# Supplementary material
Source: publisher figshare collection journal article supplement (https://gsajournals.figshare.com/ndownloader/files/20187366)
Supplement: Supplementary file 1 [file 20187366]

## Sheet: Overview
	Total	Up-regulated	Down-regulated	In Koncz list
smfab-1	6877	3957	2920	104
Share_a_ab	2541	1373	1168	49
Share_b_ab	1559	821	738	6
Share_all	634	301	333	4

## Sheet: smfab-1
Gene ID	logFC	logCPM	PValue	FDR	Direction of change	description	comp_description	IPR_domain	has SNP/indels?	SNPs/indels
AT1G01030	-0.772413	2.75941	1.25393e-06	2.05018e-05	DOWN	AP2/B3-like transcriptional factor family protein	NGATHA3 (NGA3); CONTAINS InterPro DOMAIN/s: Transcriptional factor B3 (InterPro:IPR003340); BEST Arabidopsis thaliana protein match is: AP2/B3-like transcriptional factor family protein (TAIR:AT4G01500.1)	B3 DNA binding domain | DNA-binding pseudobarrel domain	NO
AT1G01040	-0.471094	5.4553	1.26105e-05	0.000162174	DOWN	dicer-like 1	dicer-like 1 (DCL1); CONTAINS InterPro DOMAIN/s: Restriction endonuclease, type I, R subunit/Type III, Res subunit (InterPro:IPR006935), Double-stranded RNA-binding (InterPro:IPR001159), Argonaute/Dicer protein, PAZ (InterPro:IPR003100), Ribonuclease III (InterPro:IPR000999), Double-stranded RNA-binding-like (InterPro:IPR014720), DEAD-like helicase, N-terminal (InterPro:IPR014001), DNA/RNA helica…	Dicer dimerisation domain | Double-stranded RNA-binding domain | Helicase, C-terminal | Helicase, superfamily 1/2, ATP-binding domain | Helicase/UvrB domain | P-loop containing nucleoside triphosphate hydrolase | PAZ domain | Ribonuclease III | Ribonuclease III domain	NO
AT1G01060	-1.85437	5.34001	3.56367e-35	1.84658e-32	DOWN	Homeodomain-like superfamily protein	LATE ELONGATED HYPOCOTYL (LHY); CONTAINS InterPro DOMAIN/s: SANT, DNA-binding (InterPro:IPR001005), Homeodomain-like (InterPro:IPR009057), Myb, DNA-binding (InterPro:IPR014778), HTH transcriptional regulator, Myb-type, DNA-binding (InterPro:IPR017930), Myb-like DNA-binding domain, SHAQKYF class (InterPro:IPR006447); CONTAINS InterPro DOMAIN/s: SANT, DNA-binding (InterPro:IPR001005), Myb, DNA-bind…	Homeodomain-like | Myb domain | Myb domain, plants | SANT/Myb domain	NO
AT1G01080	-0.457971	5.95631	2.48309e-05	0.000295002	DOWN	RNA-binding (RRM/RBD/RNP motifs) family protein	RNA-binding (RRM/RBD/RNP motifs) family protein; FUNCTIONS IN: RNA binding, nucleotide binding, nucleic acid binding; INVOLVED IN: biological_process unknown; LOCATED IN: chloroplast; LOCATED IN: chloroplast stroma, nucleus, chloroplast, chloroplast envelope; EXPRESSED IN: 23 plant structures; EXPRESSED DURING: 13 growth stages; CONTAINS InterPro DOMAIN/s: RNA recognition motif, RNP-1 (InterPro:I…	Nucleotide-binding, alpha-beta plait | RNA recognition motif domain	NO
AT1G01090	-0.264886	7.43005	0.00426102	0.023659	DOWN	pyruvate dehydrogenase E1 alpha	pyruvate dehydrogenase E1 alpha (PDH-E1 ALPHA); FUNCTIONS IN: pyruvate dehydrogenase (acetyl-transferring) activity; INVOLVED IN: oxidation reduction, glycolysis, metabolic process; LOCATED IN: chloroplast, plastid, chloroplast envelope; EXPRESSED IN: 25 plant structures; EXPRESSED DURING: 15 growth stages; CONTAINS InterPro DOMAIN/s: Dehydrogenase, E1 component (InterPro:IPR001017), Pyruvate deh…	Dehydrogenase, E1 component | Pyruvate dehydrogenase (acetyl-transferring) E1 component, alpha subunit, subgroup y | Thiamin diphosphate-binding fold	NO
AT1G01120	0.96753	5.74951	0.00135252	0.0090691	UP	3-ketoacyl-CoA synthase 1	3-ketoacyl-CoA synthase 1 (KCS1); FUNCTIONS IN: fatty acid elongase activity, acyltransferase activity; INVOLVED IN: in 7 processes; LOCATED IN: cytosolic ribosome, endoplasmic reticulum, membrane; EXPRESSED IN: 29 plant structures; EXPRESSED DURING: 13 growth stages; CONTAINS InterPro DOMAIN/s: Thiolase-like (InterPro:IPR016039), Very-long-chain 3-ketoacyl-CoA synthase (InterPro:IPR012392), 3-Ox…	3-Oxoacyl-[acyl-carrier-protein (ACP)] synthase III C-terminal | FAE1/Type III polyketide synthase-like protein | Thiolase-like | Thiolase-like, subgroup | Very-long-chain 3-ketoacyl-CoA synthase	NO
AT1G01130	1.15033	0.428693	0.00104724	0.00733003	UP		CONTAINS InterPro DOMAIN/s: CBL-interacting protein kinase (InterPro:IPR020660), Calcium/calmodulin-dependent protein kinase-like (InterPro:IPR020636); BEST Arabidopsis thaliana protein match is: unknown protein (TAIR:AT5G47170.1)		NO
AT1G01160	0.33462	5.00015	0.00212916	0.0132727	UP	GRF1-interacting factor 2	GRF1-interacting factor 2 (GIF2); FUNCTIONS IN: protein binding, transcription coactivator activity; INVOLVED IN: cell proliferation, leaf development; LOCATED IN: nucleus; EXPRESSED IN: 22 plant structures; EXPRESSED DURING: 13 growth stages; CONTAINS InterPro DOMAIN/s: SSXT (InterPro:IPR007726); BEST Arabidopsis thaliana protein match is: GRF1-interacting factor 3 (TAIR:AT4G00850.1)	SS18 family	NO
AT1G01170	-0.275306	6.19332	0.00745215	0.0372784	DOWN	Protein of unknown function (DUF1138)	Protein of unknown function (DUF1138); FUNCTIONS IN: molecular_function unknown; INVOLVED IN: response to stress; LOCATED IN: membrane; LOCATED IN: mitochondrion, membrane; EXPRESSED IN: 23 plant structures; EXPRESSED DURING: 13 growth stages; CONTAINS InterPro DOMAIN/s: Protein of unknown function DUF1138 (InterPro:IPR009515); BEST Arabidopsis thaliana protein match is: Protein of unknown functi…	Protein of unknown function DUF1138	NO
AT1G01180	0.465705	4.01179	0.000497065	0.00389975	UP	S-adenosyl-L-methionine-dependent methyltransferases superfamily protein	S-adenosyl-L-methionine-dependent methyltransferases superfamily protein; FUNCTIONS IN: methyltransferase activity; INVOLVED IN: lipid biosynthetic process; EXPRESSED IN: sperm cell, hypocotyl; CONTAINS InterPro DOMAIN/s: Rhamnosyl O-methyltransferase/Cephalosporin hydroxylase (InterPro:IPR007072)	S-adenosyl-L-methionine-dependent methyltransferase-like	NO
AT1G01250	-1.00145	3.86626	7.90036e-07	1.34594e-05	DOWN	Integrase-type DNA-binding superfamily protein	Integrase-type DNA-binding superfamily protein; FUNCTIONS IN: DNA binding, sequence-specific DNA binding transcription factor activity; INVOLVED IN: regulation of transcription, DNA-dependent; LOCATED IN: nucleus, chloroplast; EXPRESSED IN: 10 plant structures; EXPRESSED DURING: 6 growth stages; CONTAINS InterPro DOMAIN/s: DNA-binding, integrase-type (InterPro:IPR016177), Pathogenesis-related tra…	AP2/ERF domain | DNA-binding domain	NO
AT1G01300	0.687896	4.7732	6.23833e-07	1.08474e-05	UP	Eukaryotic aspartyl protease family protein	Eukaryotic aspartyl protease family protein; FUNCTIONS IN: aspartic-type endopeptidase activity; INVOLVED IN: proteolysis, response to karrikin; LOCATED IN: membrane, plant-type cell wall; EXPRESSED IN: 22 plant structures; EXPRESSED DURING: 13 growth stages; CONTAINS InterPro DOMAIN/s: Peptidase aspartic (InterPro:IPR021109), Peptidase aspartic, catalytic (InterPro:IPR009007), Peptidase A1 (Inte…	Aspartic peptidase | Aspartic peptidase domain	NO
AT1G01350	0.402956	4.43328	0.000244126	0.00212356	UP	Zinc finger (CCCH-type/C3HC4-type RING finger) family protein	Zinc finger (CCCH-type/C3HC4-type RING finger) family protein; FUNCTIONS IN: zinc ion binding, nucleic acid binding; CONTAINS InterPro DOMAIN/s: Zinc finger, CCCH-type (InterPro:IPR000571), Zinc finger, RING-type, conserved site (InterPro:IPR017907), Zinc finger, RING-type (InterPro:IPR001841); BEST Arabidopsis thaliana protein match is: Zinc finger (CCCH-type/C3HC4-type RING finger) family prote…	Zinc finger, CCCH-type | Zinc finger, RING-type | Zinc finger, RING-type, conserved site | Zinc finger, RING/FYVE/PHD-type	NO
AT1G01390	-1.36459	1.95511	1.08447e-06	1.79225e-05	DOWN	UDP-Glycosyltransferase superfamily protein	UDP-Glycosyltransferase superfamily protein; FUNCTIONS IN: UDP-glycosyltransferase activity, transferase activity, transferring glycosyl groups; INVOLVED IN: metabolic process; EXPRESSED IN: 7 plant structures; EXPRESSED DURING: 9 growth stages; CONTAINS InterPro DOMAIN/s: UDP-glucuronosyl/UDP-glucosyltransferase (InterPro:IPR002213); BEST Arabidopsis thaliana protein match is: UDP-glucosyl trans…	UDP-glucuronosyl/UDP-glucosyltransferase	NO
AT1G01420	-0.401762	3.81811	0.00118876	0.0081396	DOWN	UDP-glucosyl transferase 72B3	UDP-glucosyl transferase 72B3 (UGT72B3); FUNCTIONS IN: quercetin 3-O-glucosyltransferase activity, UDP-glycosyltransferase activity, transferase activity, transferring glycosyl groups; INVOLVED IN: metabolic process; LOCATED IN: cellular_component unknown; EXPRESSED IN: 11 plant structures; EXPRESSED DURING: LP.04 four leaves visible, petal differentiation and expansion stage; CONTAINS InterPro D…	UDP-glucuronosyl/UDP-glucosyltransferase	NO
AT1G01440	0.370795	4.83915	0.00107392	0.00748879	UP	Protein of unknown function (DUF3133)	Protein of unknown function (DUF3133); CONTAINS InterPro DOMAIN/s: Protein of unknown function DUF3133 (InterPro:IPR021480); BEST Arabidopsis thaliana protein match is: Protein of unknown function (DUF3133) (TAIR:AT4G01090.1)	Protein of unknown function DUF3133	NO
AT1G01448	0.401554	4.51304	0.00100715	0.00709068	UP	other RNA			NO
AT1G01510	0.408871	5.38241	2.12056e-05	0.000256087	UP	NAD(P)-binding Rossmann-fold superfamily protein	ANGUSTIFOLIA (AN); CONTAINS InterPro DOMAIN/s: D-isomer specific 2-hydroxyacid dehydrogenase, NAD-binding (InterPro:IPR006140), NAD(P)-binding domain (InterPro:IPR016040); BEST Arabidopsis thaliana protein match is: D-isomer specific 2-hydroxyacid dehydrogenase family protein (TAIR:AT1G12550.1)	D-isomer specific 2-hydroxyacid dehydrogenase, NAD-binding domain | NAD(P)-binding domain	NO
AT1G01520	-2.40828	3.43492	1.63335e-23	3.17994e-21	DOWN	Homeodomain-like superfamily protein	Homeodomain-like superfamily protein; CONTAINS InterPro DOMAIN/s: SANT, DNA-binding (InterPro:IPR001005), Homeodomain-like (InterPro:IPR009057), Myb, DNA-binding (InterPro:IPR014778), Myb-like DNA-binding domain, SHAQKYF class (InterPro:IPR006447), HTH transcriptional regulator, Myb-type, DNA-binding (InterPro:IPR017930); BEST Arabidopsis thaliana protein match is: Homeodomain-like superfamily pr…	Homeodomain-like | Myb domain | Myb domain, plants | SANT/Myb domain	NO
AT1G01540	0.603762	6.19459	2.45875e-07	4.65504e-06	UP	Protein kinase superfamily protein	Protein kinase superfamily protein; FUNCTIONS IN: protein serine/threonine kinase activity, protein kinase activity, kinase activity, ATP binding; INVOLVED IN: protein amino acid phosphorylation; LOCATED IN: plasma membrane; EXPRESSED IN: 23 plant structures; EXPRESSED DURING: 13 growth stages; CONTAINS InterPro DOMAIN/s: Protein kinase, ATP binding site (InterPro:IPR017441), Serine/threonine-pro…	Protein kinase domain | Protein kinase, ATP binding site | Protein kinase-like domain | Serine/threonine-protein kinase, active site	NO
AT1G01610	0.324687	6.07003	0.00837713	0.0411444	UP	glycerol-3-phosphate acyltransferase 4	glycerol-3-phosphate acyltransferase 4 (GPAT4); FUNCTIONS IN: 1-acylglycerol-3-phosphate O-acyltransferase activity, acyltransferase activity; INVOLVED IN: metabolic process, cutin biosynthetic process; EXPRESSED IN: 25 plant structures; EXPRESSED DURING: 14 growth stages; CONTAINS InterPro DOMAIN/s: Phospholipid/glycerol acyltransferase (InterPro:IPR002123); BEST Arabidopsis thaliana protein mat…	Phospholipid/glycerol acyltransferase	NO
AT1G01620	1.26942	9.18869	3.62286e-29	1.20813e-26	UP	plasma membrane intrinsic protein 1C	plasma membrane intrinsic protein 1C (PIP1C); FUNCTIONS IN: water channel activity; INVOLVED IN: response to water deprivation, response to salt stress, transport, water transport; LOCATED IN: plasma membrane, chloroplast, membrane; LOCATED IN: plasma membrane, membrane; EXPRESSED IN: 22 plant structures; EXPRESSED DURING: 14 growth stages; CONTAINS InterPro DOMAIN/s: Major intrinsic protein, con…	Aquaporin-like | Major intrinsic protein | Major intrinsic protein, conserved site	NO
AT1G01640	0.877508	1.20531	0.00334608	0.0193276	UP	BTB/POZ domain-containing protein	BTB/POZ domain-containing protein; CONTAINS InterPro DOMAIN/s: BTB/POZ (InterPro:IPR013069), BTB/POZ fold (InterPro:IPR011333), Kelch related (InterPro:IPR013089), BTB/POZ-like (InterPro:IPR000210); BEST Arabidopsis thaliana protein match is: BTB/POZ domain-containing protein (TAIR:AT3G56230.1)	BTB/POZ | BTB/POZ fold | BTB/POZ-like	NO
AT1G01670	-1.36804	-0.0451568	6.64027e-06	9.18107e-05	DOWN	RING/U-box superfamily protein	RING/U-box superfamily protein; FUNCTIONS IN: ubiquitin-protein ligase activity; INVOLVED IN: protein ubiquitination; LOCATED IN: ubiquitin ligase complex; EXPRESSED IN: 12 plant structures; EXPRESSED DURING: 7 growth stages; CONTAINS InterPro DOMAIN/s: U box domain (InterPro:IPR003613); BEST Arabidopsis thaliana protein match is: RING/U-box superfamily protein (TAIR:AT3G61390.2)	Rossmann-like alpha/beta/alpha sandwich fold | U box domain | Zinc finger, RING/FYVE/PHD-type	NO
AT1G01695	-4.9497	-2.20033	3.81337e-06	5.5867e-05	DOWN	Phosphatidylinositol N-acetyglucosaminlytransferase subunit P-related	Phosphatidylinositol N-acetyglucosaminlytransferase subunit P-related; FUNCTIONS IN: molecular_function unknown; INVOLVED IN: biological_process unknown; LOCATED IN: cellular_component unknown; BEST Arabidopsis thaliana protein match is: Protein of unknown function (DUF3741) (TAIR:AT4G00440.1)	Domain of unknown function DUF4378	NO
AT1G01720	-0.985481	6.26401	2.67796e-06	4.0465e-05	DOWN	NAC (No Apical Meristem) domain transcriptional regulator superfamily protein	ATAF1; CONTAINS InterPro DOMAIN/s: No apical meristem (NAM) protein (InterPro:IPR003441); BEST Arabidopsis thaliana protein match is: NAC domain containing protein 32 (TAIR:AT1G77450.1)	NAC domain	NO
AT1G01740	-1.04669	2.1814	4.77477e-10	1.50721e-08	DOWN	Protein kinase protein with tetratricopeptide repeat domain	Protein kinase protein with tetratricopeptide repeat domain; FUNCTIONS IN: protein serine/threonine kinase activity, binding, protein kinase activity, kinase activity, ATP binding; INVOLVED IN: protein amino acid phosphorylation; INVOLVED IN: protein amino acid phosphorylation, N-terminal protein myristoylation; EXPRESSED IN: 22 plant structures; LOCATED IN: plasma membrane; EXPRESSED DURING: 13 …	Protein kinase domain | Protein kinase-like domain | Serine-threonine/tyrosine-protein kinase catalytic domain | Tetratricopeptide-like helical domain	NO
AT1G01770	1.20995	5.78412	1.42534e-22	2.50036e-20	UP		unknown protein; CONTAINS InterPro DOMAIN/s: Protein of unknown function DUF1446 (InterPro:IPR010839)	Protein of unknown function DUF1446	NO
AT1G01780	0.833938	4.22657	3.68518e-10	1.18323e-08	UP	GATA type zinc finger transcription factor family protein	GATA type zinc finger transcription factor family protein; FUNCTIONS IN: zinc ion binding; INVOLVED IN: biological_process unknown; LOCATED IN: cellular_component unknown; EXPRESSED IN: 23 plant structures; EXPRESSED DURING: 15 growth stages; CONTAINS InterPro DOMAIN/s: Zinc finger, LIM-type (InterPro:IPR001781); BEST Arabidopsis thaliana protein match is: GATA type zinc finger transcription fact…	Zinc finger, LIM-type	NO
AT1G01790	-0.866289	7.13601	9.43779e-16	7.0796e-14	DOWN	K+ efflux antiporter 1	K+ efflux antiporter 1 (KEA1); FUNCTIONS IN: potassium:hydrogen antiporter activity, potassium ion transmembrane transporter activity; INVOLVED IN: potassium ion transport, cation transport, metabolic process, transmembrane transport; LOCATED IN: chloroplast, chloroplast envelope; EXPRESSED IN: 23 plant structures; EXPRESSED DURING: 15 growth stages; CONTAINS InterPro DOMAIN/s: K+/H+ exchanger (I…	Cation/H+ exchanger | K+/H+ exchanger | NAD(P)-binding domain | Regulator of K+ conductance, N-terminal	NO
AT1G01830	-0.507714	4.72601	0.000792264	0.00578776	DOWN	ARM repeat superfamily protein	ARM repeat superfamily protein; FUNCTIONS IN: binding; LOCATED IN: cellular_component unknown; EXPRESSED IN: 22 plant structures; EXPRESSED DURING: 13 growth stages; CONTAINS InterPro DOMAIN/s: Armadillo-like helical (InterPro:IPR011989), Armadillo (InterPro:IPR000225), Armadillo-type fold (InterPro:IPR016024); BEST Arabidopsis thaliana protein match is: ARM repeat superfamily protein (TAIR:AT2G4…	Armadillo | Armadillo-like helical | Armadillo-type fold	NO
AT1G01840	0.770223	0.437399	0.00489258	0.0265016	UP		unknown protein		NO
AT1G01860	-0.787668	3.9978	5.68504e-09	1.50415e-07	DOWN	Ribosomal RNA adenine dimethylase family protein	PALEFACE 1 (PFC1); FUNCTIONS IN: mRNA (2'-O-methyladenosine-N6-)-methyltransferase activity; INVOLVED IN: response to cold; LOCATED IN: chloroplast; EXPRESSED IN: 22 plant structures; EXPRESSED DURING: 13 growth stages; CONTAINS InterPro DOMAIN/s: Ribosomal RNA adenine methylase transferase, N-terminal (InterPro:IPR020598), Ribosomal RNA adenine methylase transferase, conserved site (InterPro:IPR…	Ribosomal RNA adenine methylase transferase | Ribosomal RNA adenine methylase transferase, N-terminal | Ribosomal RNA adenine methylase transferase, conserved site | S-adenosyl-L-methionine-dependent methyltransferase-like | rRNA adenine dimethylase-like	NO
AT1G01910	0.308481	5.26498	0.00341795	0.0196786	UP	P-loop containing nucleoside triphosphate hydrolases superfamily protein	P-loop containing nucleoside triphosphate hydrolases superfamily protein; FUNCTIONS IN: ATP binding; INVOLVED IN: anion transport; INVOLVED IN: cellular metal ion homeostasis, anion transport; LOCATED IN: endomembrane system, membrane; LOCATED IN: membrane; EXPRESSED IN: 24 plant structures; EXPRESSED DURING: 15 growth stages; BEST Arabidopsis thaliana protein match is: P-loop containing nucleosi…	Anion-transporting ATPase-like domain | Arsenical pump ATPase, ArsA/GET3 | Arsenical pump ATPase, ArsA/GET3, eukaryotic | P-loop containing nucleoside triphosphate hydrolase	NO
AT1G01920	-0.392248	4.01329	0.00505827	0.0271979	DOWN	SET domain-containing protein	SET domain-containing protein; CONTAINS InterPro DOMAIN/s: SET domain (InterPro:IPR001214); BEST Arabidopsis thaliana protein match is: Rubisco methyltransferase family protein (TAIR:AT1G14030.1)	SET domain	NO
AT1G01930	0.311854	4.22218	0.00935604	0.0450688	UP	zinc finger protein-related	zinc finger protein-related; FUNCTIONS IN: zinc ion binding; INVOLVED IN: biological_process unknown; LOCATED IN: intracellular; EXPRESSED IN: 24 plant structures; EXPRESSED DURING: 15 growth stages; CONTAINS InterPro DOMAIN/s: Zinc finger, C2H2-like (InterPro:IPR015880), Ankyrin repeat-containing domain (InterPro:IPR020683), Ankyrin repeat (InterPro:IPR002110)	Ankyrin repeat | Ankyrin repeat-containing domain | Zinc finger, C2H2-like	NO
AT1G01970	-0.862479	4.62503	2.08885e-17	1.94888e-15	DOWN	Tetratricopeptide repeat (TPR)-like superfamily protein	Tetratricopeptide repeat (TPR)-like superfamily protein; CONTAINS InterPro DOMAIN/s: Pentatricopeptide repeat (InterPro:IPR002885); BEST Arabidopsis thaliana protein match is: pentatricopeptide (PPR) repeat-containing protein (TAIR:AT1G19520.1)	Pentatricopeptide repeat	NO
AT1G02000	0.416285	3.56185	0.00304187	0.0178801	UP	UDP-D-glucuronate 4-epimerase 2	UDP-D-glucuronate 4-epimerase 2 (GAE2); FUNCTIONS IN: UDP-glucuronate 4-epimerase activity, catalytic activity; INVOLVED IN: cellular metabolic process, carbohydrate metabolic process, nucleotide-sugar metabolic process, metabolic process; LOCATED IN: cellular_component unknown; EXPRESSED IN: 25 plant structures; EXPRESSED DURING: 15 growth stages; CONTAINS InterPro DOMAIN/s: NAD-dependent epimer…	NAD(P)-binding domain | NAD-dependent epimerase/dehydratase, N-terminal domain | Nucleotide sugar epimerase	NO
AT1G02010	-0.472547	3.97217	3.95282e-05	0.000443488	DOWN	secretory 1A	secretory 1A (SEC1A); FUNCTIONS IN: protein transporter activity; INVOLVED IN: protein secretion, vesicle-mediated transport, vesicle docking involved in exocytosis; LOCATED IN: cellular_component unknown; CONTAINS InterPro DOMAIN/s: Sec1-like protein (InterPro:IPR001619); BEST Arabidopsis thaliana protein match is: Sec1/munc18-like (SM) proteins superfamily (TAIR:AT1G12360.1)	Sec1-like protein | Sec1-like, domain 2	NO
AT1G02020	0.56647	4.71946	1.46438e-07	2.89958e-06	UP	nitroreductase family protein	nitroreductase family protein; FUNCTIONS IN: oxidoreductase activity, acting on NADH or NADPH, nitrogenous group as acceptor, oxidoreductase activity; INVOLVED IN: metabolic process; LOCATED IN: chloroplast; EXPRESSED IN: 23 plant structures; EXPRESSED DURING: 13 growth stages; CONTAINS InterPro DOMAIN/s: Nitroreductase-like (InterPro:IPR000415)	Nitroreductase | Nitroreductase-like	NO
AT1G02145	0.496498	4.92511	1.20212e-05	0.000155288	UP	homolog of asparagine-linked glycosylation 12	homolog of asparagine-linked glycosylation 12 (ALG12); FUNCTIONS IN: alpha-1,6-mannosyltransferase activity; INVOLVED IN: ER-associated protein catabolic process, protein amino acid terminal N-glycosylation; LOCATED IN: endomembrane system, intrinsic to endoplasmic reticulum membrane; LOCATED IN: intrinsic to endoplasmic reticulum membrane; CONTAINS InterPro DOMAIN/s: Alg9-like mannosyltransferas…	GPI mannosyltransferase	NO
AT1G02170	0.444045	4.3499	3.10356e-05	0.00035946	UP	metacaspase 1	metacaspase 1 (AMC1); FUNCTIONS IN: cysteine-type endopeptidase activity; INVOLVED IN: proteolysis, induction of apoptosis; LOCATED IN: chloroplast; EXPRESSED IN: 23 plant structures; EXPRESSED DURING: 15 growth stages; CONTAINS InterPro DOMAIN/s: Zinc finger, LSD1-type (InterPro:IPR005735), Peptidase C14, caspase catalytic (InterPro:IPR011600); BEST Arabidopsis thaliana protein match is: metacas…	Caspase-like domain | Peptidase C14, caspase domain | Zinc finger, LSD1-type	NO
AT1G02280	0.303197	6.193	0.00733282	0.0367963	UP	translocon at the outer envelope membrane of chloroplasts 33	translocon at the outer envelope membrane of chloroplasts 33 (TOC33); FUNCTIONS IN: protein binding, GTP binding, GTPase activity, protein homodimerization activity; INVOLVED IN: protein targeting to chloroplast; LOCATED IN: chloroplast outer membrane, chloroplast; LOCATED IN: chloroplast outer membrane, chloroplast, chloroplast envelope; EXPRESSED IN: 23 plant structures; EXPRESSED DURING: 13 gr…	AIG1 | Chloroplast protein import component Toc34 | P-loop containing nucleoside triphosphate hydrolase	NO
AT1G02330	0.386012	4.5338	0.000690514	0.00514881	UP		CONTAINS InterPro DOMAIN/s: Hepatocellular carcinoma-associated antigen 59 (InterPro:IPR010756)	Hepatocellular carcinoma-associated antigen 59	NO
AT1G02340	-0.554056	5.19646	0.000899428	0.0064386	DOWN	basic helix-loop-helix (bHLH) DNA-binding superfamily protein	LONG HYPOCOTYL IN FAR-RED (HFR1); CONTAINS InterPro DOMAIN/s: Helix-loop-helix DNA-binding domain (InterPro:IPR001092), Helix-loop-helix DNA-binding (InterPro:IPR011598); BEST Arabidopsis thaliana protein match is: phytochrome interacting factor 3 (TAIR:AT1G09530.2)	Myc-type, basic helix-loop-helix (bHLH) domain	NO
AT1G02380	1.89621	3.17599	5.96883e-12	2.52241e-10	UP		unknown protein; BEST Arabidopsis thaliana protein match is: unknown protein (TAIR:AT4G01960.1)		NO
AT1G02390	-1.12131	3.82569	0.000510434	0.00398885	DOWN	glycerol-3-phosphate acyltransferase 2	glycerol-3-phosphate acyltransferase 2 (GPAT2); FUNCTIONS IN: acyltransferase activity; INVOLVED IN: metabolic process; EXPRESSED IN: 13 plant structures; EXPRESSED DURING: 8 growth stages; CONTAINS InterPro DOMAIN/s: Phospholipid/glycerol acyltransferase (InterPro:IPR002123); BEST Arabidopsis thaliana protein match is: glycerol-3-phosphate acyltransferase 3 (TAIR:AT4G01950.1)	Phospholipid/glycerol acyltransferase	NO
AT1G02470	-2.22345	0.130584	1.99503e-05	0.00024253	DOWN	Polyketide cyclase/dehydrase and lipid transport superfamily protein	Polyketide cyclase/dehydrase and lipid transport superfamily protein; FUNCTIONS IN: molecular_function unknown; INVOLVED IN: biological_process unknown; LOCATED IN: chloroplast; EXPRESSED IN: 10 plant structures; EXPRESSED DURING: 4 anthesis, C globular stage, petal differentiation and expansion stage; CONTAINS InterPro DOMAIN/s: Streptomyces cyclase/dehydrase (InterPro:IPR005031); BEST Arabidops…	START-like domain | Streptomyces cyclase/dehydrase	NO
AT1G02475	-0.61924	5.73299	3.17706e-08	7.24977e-07	DOWN	Polyketide cyclase/dehydrase and lipid transport superfamily protein	Polyketide cyclase/dehydrase and lipid transport superfamily protein; FUNCTIONS IN: molecular_function unknown; INVOLVED IN: biological_process unknown; LOCATED IN: chloroplast; EXPRESSED IN: 22 plant structures; EXPRESSED DURING: 13 growth stages; CONTAINS InterPro DOMAIN/s: Streptomyces cyclase/dehydrase (InterPro:IPR005031); BEST Arabidopsis thaliana protein match is: Polyketide cyclase / dehy…	START-like domain | Streptomyces cyclase/dehydrase	NO
AT1G02610	1.69767	4.95049	1.05955e-12	5.13476e-11	UP	RING/FYVE/PHD zinc finger superfamily protein	RING/FYVE/PHD zinc finger superfamily protein; FUNCTIONS IN: zinc ion binding; CONTAINS InterPro DOMAIN/s: Protein of unknown function DUF3675 (InterPro:IPR022143), Zinc finger, C3HC4 RING-type (InterPro:IPR018957), Zinc finger, RING-CH-type (InterPro:IPR011016); BEST Arabidopsis thaliana protein match is: RING/FYVE/PHD zinc finger superfamily protein (TAIR:AT4G02075.1)	Protein of unknown function DUF3675 | Zinc finger, RING-CH-type | Zinc finger, RING/FYVE/PHD-type	NO
AT1G02620	3.15503	1.92977	7.94025e-16	6.02332e-14	UP	Ras-related small GTP-binding family protein	Ras-related small GTP-binding family protein; FUNCTIONS IN: GTP binding; INVOLVED IN: intracellular protein transport; LOCATED IN: endomembrane system, intracellular; CONTAINS InterPro DOMAIN/s: Small GTPase SAR1-type (InterPro:IPR006687), ARF/SAR superfamily (InterPro:IPR006689); BEST Arabidopsis thaliana protein match is: secretion-associated RAS super family 2 (TAIR:AT4G02080.1)	P-loop containing nucleoside triphosphate hydrolase | Small GTPase superfamily, ARF/SAR type | Small GTPase superfamily, SAR1-type	NO
AT1G02640	3.11903	5.40726	3.44701e-13	1.79719e-11	UP	beta-xylosidase 2	beta-xylosidase 2 (BXL2); FUNCTIONS IN: hydrolase activity, hydrolyzing O-glycosyl compounds; INVOLVED IN: carbohydrate metabolic process; LOCATED IN: plant-type cell wall; EXPRESSED IN: 23 plant structures; EXPRESSED DURING: 13 growth stages; CONTAINS InterPro DOMAIN/s: Glycoside hydrolase, family 3, N-terminal (InterPro:IPR001764), Glycoside hydrolase, family 3, C-terminal (InterPro:IPR002772),…	Fibronectin type III-like domain | Glycoside hydrolase family 3 | Glycoside hydrolase family 3 C-terminal domain | Glycoside hydrolase, family 3, N-terminal | Glycoside hydrolase, superfamily	NO
AT1G02650	2.31955	1.12764	3.70067e-08	8.30395e-07	UP	Tetratricopeptide repeat (TPR)-like superfamily protein	Tetratricopeptide repeat (TPR)-like superfamily protein; FUNCTIONS IN: heat shock protein binding, binding; INVOLVED IN: protein folding; LOCATED IN: cellular_component unknown; CONTAINS InterPro DOMAIN/s: Tetratricopeptide-like helical (InterPro:IPR011990), Heat shock protein DnaJ, N-terminal (InterPro:IPR001623); BEST Arabidopsis thaliana protein match is: Heat shock protein DnaJ with tetratric…	DnaJ domain | Tetratricopeptide-like helical domain	NO
AT1G02660	2.52024	5.4914	4.3875e-19	5.43292e-17	UP	alpha/beta-Hydrolases superfamily protein	alpha/beta-Hydrolases superfamily protein; FUNCTIONS IN: triglyceride lipase activity; INVOLVED IN: lipid metabolic process; LOCATED IN: cellular_component unknown; EXPRESSED IN: 24 plant structures; EXPRESSED DURING: 15 growth stages; CONTAINS InterPro DOMAIN/s: Lipase, class 3 (InterPro:IPR002921); BEST Arabidopsis thaliana protein match is: alpha/beta-Hydrolases superfamily protein (TAIR:AT3G6…	Alpha/Beta hydrolase fold | Fungal lipase-like domain	NO
AT1G02750	0.37791	3.98631	0.00180012	0.0115442	UP	Drought-responsive family protein	Drought-responsive family protein; FUNCTIONS IN: zinc ion binding; INVOLVED IN: response to water deprivation; EXPRESSED IN: 22 plant structures; EXPRESSED DURING: 13 growth stages; LOCATED IN: intracellular; CONTAINS InterPro DOMAIN/s: Drought induced 19/ RING finger protein 114 (InterPro:IPR008598); BEST Arabidopsis thaliana protein match is: Drought-responsive family protein (TAIR:AT4G02200.1)…	Drought induced 19 protein-like, zinc-binding domain | Protein dehydration-induced 19, C-terminal | Zinc finger, C2H2-like	NO
AT1G02800	-0.91917	0.325135	0.00420708	0.0234213	DOWN	cellulase 2	cellulase 2 (CEL2); FUNCTIONS IN: cellulase activity, hydrolase activity, hydrolyzing O-glycosyl compounds; INVOLVED IN: response to nematode, pattern specification process; LOCATED IN: endomembrane system; EXPRESSED IN: 11 plant structures; EXPRESSED DURING: 6 growth stages; CONTAINS InterPro DOMAIN/s: Six-hairpin glycosidase (InterPro:IPR012341), Glycoside hydrolase, family 9, active site (Inte…	Glycoside hydrolase, family 9 | Glycoside hydrolase, family 9, active site | Six-hairpin glycosidase | Six-hairpin glycosidase-like	NO
AT1G02810	0.82032	2.14512	0.000163924	0.00150275	UP	Plant invertase/pectin methylesterase inhibitor superfamily	Plant invertase/pectin methylesterase inhibitor superfamily; FUNCTIONS IN: enzyme inhibitor activity, pectinesterase activity; INVOLVED IN: cell wall modification; LOCATED IN: endomembrane system, cell wall, plant-type cell wall; EXPRESSED IN: 14 plant structures; EXPRESSED DURING: 6 growth stages; CONTAINS InterPro DOMAIN/s: Pectinesterase, active site (InterPro:IPR018040), Pectin lyase fold/vir…	Pectin lyase fold | Pectin lyase fold/virulence factor | Pectinesterase inhibitor domain | Pectinesterase, active site | Pectinesterase, catalytic	NO
AT1G02820	-1.04369	4.56754	1.67581e-06	2.65989e-05	DOWN	Late embryogenesis abundant 3 (LEA3) family protein	Late embryogenesis abundant 3 (LEA3) family protein; FUNCTIONS IN: molecular_function unknown; INVOLVED IN: embryo development, response to stress; EXPRESSED IN: 16 plant structures; EXPRESSED DURING: 8 growth stages; CONTAINS InterPro DOMAIN/s: Late embryogenesis abundant protein, group 3 (InterPro:IPR004926); BEST Arabidopsis thaliana protein match is: senescence-associated gene 21 (TAIR:AT4G02…	Late embryogenesis abundant protein, LEA-5	NO
AT1G02860	0.701319	4.67605	4.84832e-10	1.52756e-08	UP	SPX (SYG1/Pho81/XPR1) domain-containing protein	nitrogen limitation adaptation (NLA); CONTAINS InterPro DOMAIN/s: Zinc finger, RING-type, conserved site (InterPro:IPR017907), Zinc finger, RING-type (InterPro:IPR001841), SPX, N-terminal (InterPro:IPR004331); BEST Arabidopsis thaliana protein match is: SPX (SYG1/Pho81/XPR1) domain-containing protein / zinc finger (C3HC4-type RING finger) protein-related (TAIR:AT2G38920.1); BEST Arabidopsis thali…	SPX, N-terminal | Zinc finger, RING-type | Zinc finger, RING-type, conserved site | Zinc finger, RING/FYVE/PHD-type	NO
AT1G02870	0.425641	3.67274	0.00209515	0.0130921	UP		FUNCTIONS IN: molecular_function unknown; INVOLVED IN: biological_process unknown; EXPRESSED IN: 23 plant structures; EXPRESSED DURING: 13 growth stages; CONTAINS InterPro DOMAIN/s: Ribosome biogenesis protein Nop16 (InterPro:IPR019002)	Ribosome biogenesis protein Nop16	NO
AT1G02900	0.601278	2.44706	0.00149172	0.00985343	UP	rapid alkalinization factor 1	rapid alkalinization factor 1 (RALF1); CONTAINS InterPro DOMAIN/s: Rapid ALkalinization Factor (InterPro:IPR008801); BEST Arabidopsis thaliana protein match is: ralf-like 33 (TAIR:AT4G15800.1)	Rapid ALkalinization Factor	NO
AT1G02910	-0.323501	5.89443	0.00110865	0.00769665	DOWN	tetratricopeptide repeat (TPR)-containing protein	LOW PSII ACCUMULATION1 (LPA1); FUNCTIONS IN: binding; INVOLVED IN: photosystem II oxygen evolving complex assembly; LOCATED IN: chloroplast; EXPRESSED IN: 22 plant structures; EXPRESSED DURING: 13 growth stages; CONTAINS InterPro DOMAIN/s: Protein of unknown function DUF3493 (InterPro:IPR021883), Tetratricopeptide-like helical (InterPro:IPR011990), Tetratricopeptide repeat-containing (InterPro:IP…	Protein of unknown function DUF3493 | Tetratricopeptide TPR1 | Tetratricopeptide TPR2 | Tetratricopeptide repeat | Tetratricopeptide repeat-containing domain | Tetratricopeptide-like helical domain	NO
AT1G02920	-1.13396	3.02467	0.00393749	0.0221696	DOWN	glutathione S-transferase 7	glutathione S-transferase 7 (GSTF7); FUNCTIONS IN: glutathione transferase activity, copper ion binding, cobalt ion binding, glutathione binding; INVOLVED IN: defense response to fungus, incompatible interaction, response to cadmium ion, response to salt stress, defense response to bacterium, toxin catabolic process; LOCATED IN: nucleus, vacuole, cytoplasm; EXPRESSED IN: root, cultured cell, leaf…	Glutathione S-transferase, C-terminal | Glutathione S-transferase, C-terminal-like | Glutathione S-transferase, N-terminal | Thioredoxin-like fold	NO
AT1G02930	-1.09974	2.99865	0.00911942	0.044165	DOWN	glutathione S-transferase 6	glutathione S-transferase 6 (GSTF6); FUNCTIONS IN: glutathione transferase activity, cobalt ion binding; FUNCTIONS IN: glutathione transferase activity, copper ion binding, cobalt ion binding, glutathione binding; INVOLVED IN: in 7 processes; INVOLVED IN: response to oxidative stress, response to water deprivation, toxin catabolic process, response to stress; LOCATED IN: mitochondrion, cell wall,…	Glutathione S-transferase, C-terminal | Glutathione S-transferase, C-terminal-like | Glutathione S-transferase, N-terminal | Thioredoxin-like fold	NO
AT1G02970	-0.923537	0.560758	0.000298831	0.00252698	DOWN	WEE1 kinase homolog	WEE1 kinase homolog (WEE1); CONTAINS InterPro DOMAIN/s: Protein kinase, ATP binding site (InterPro:IPR017441), Protein kinase, catalytic domain (InterPro:IPR000719), Serine/threonine-protein kinase-like domain (InterPro:IPR017442), Protein kinase-like domain (InterPro:IPR011009), Serine/threonine-protein kinase, active site (InterPro:IPR008271); BEST Arabidopsis thaliana protein match is: Protein…	Protein kinase domain | Protein kinase, ATP binding site | Protein kinase-like domain | Serine/threonine-protein kinase, active site	NO
AT1G02990	-0.464665	4.76899	6.20675e-05	0.000653485	DOWN		FUNCTIONS IN: molecular_function unknown; INVOLVED IN: biological_process unknown; LOCATED IN: cellular_component unknown; BEST Arabidopsis thaliana protein match is: CW-type Zinc Finger (TAIR:AT3G62900.1)		NO
AT1G03055	-1.07171	2.72523	3.09197e-08	7.07478e-07	DOWN		unknown protein; BEST Arabidopsis thaliana protein match is: unknown protein (TAIR:AT1G64680.1)	Domain of unknown function DUF4033	NO
AT1G03090	1.63642	7.30766	1.68134e-30	6.22299e-28	UP	methylcrotonyl-CoA carboxylase alpha chain, mitochondrial / 3-methylcrotonyl-CoA carboxylase 1 (MCCA)	MCCA; FUNCTIONS IN: cobalt ion binding, methylcrotonoyl-CoA carboxylase activity; INVOLVED IN: leucine catabolic process; LOCATED IN: mitochondrion, cytosolic ribosome; EXPRESSED IN: 26 plant structures; EXPRESSED DURING: 13 growth stages; CONTAINS InterPro DOMAIN/s: Single hybrid motif (InterPro:IPR011053), Biotin/lipoyl attachment (InterPro:IPR000089), Carbamoyl phosphate synthase, large subuni…	ATP-grasp fold | ATP-grasp fold, subdomain 1 | ATP-grasp fold, subdomain 2 | Biotin carboxylase, C-terminal | Biotin carboxylation domain | Biotin-binding site | Biotin/lipoyl attachment | Carbamoyl-phosphate synthase, large subunit, N-terminal | Carbamoyl-phosphate synthetase large subunit-like, ATP-binding domain | Pre-ATP-grasp domain | Rudiment single hybrid motif | Single hybrid motif	NO
AT1G03140	0.483832	5.7265	9.59505e-07	1.60144e-05	UP	splicing factor Prp18 family protein	splicing factor Prp18 family protein; INVOLVED IN: RNA splicing; LOCATED IN: spliceosomal complex; EXPRESSED IN: male gametophyte, cultured cell, pollen tube; EXPRESSED DURING: L mature pollen stage, M germinated pollen stage; CONTAINS InterPro DOMAIN/s: Pre-mRNA processing factor 4 (PRP4) like (InterPro:IPR014906), Splicing factor motif (InterPro:IPR003648), Prp18 (InterPro:IPR004098); BEST Arab…	Pre-mRNA processing factor 4 (PRP4)-like | Prp18 | Splicing factor motif	NO
AT1G03160	-0.486074	5.82056	3.73171e-07	6.78659e-06	DOWN	FZO-like	FZO-like (FZL); FUNCTIONS IN: thiamin-phosphate diphosphorylase activity, GTP binding; FUNCTIONS IN: thiamin-phosphate diphosphorylase activity, GTP binding, GTPase activity; INVOLVED IN: vegetative to reproductive phase transition of meristem, thylakoid membrane organization; LOCATED IN: chloroplast membrane, chloroplast; EXPRESSED IN: 23 plant structures; EXPRESSED DURING: 13 growth stages; CON…	Aldolase-type TIM barrel | GTP binding domain | P-loop containing nucleoside triphosphate hydrolase | Thiamin phosphate synthase superfamily | Thiamine phosphate synthase	NO
AT1G03200	-0.557353	2.42269	0.00119312	0.00816443	DOWN		unknown protein; BEST Arabidopsis thaliana protein match is: unknown protein (TAIR:AT1G03240.1)		NO
AT1G03220	0.57507	6.38655	3.09647e-05	0.000359009	UP	Eukaryotic aspartyl protease family protein	Eukaryotic aspartyl protease family protein; FUNCTIONS IN: aspartic-type endopeptidase activity; INVOLVED IN: response to salt stress; LOCATED IN: cell wall, plasma membrane, membrane, plant-type cell wall; EXPRESSED IN: 6 plant structures; CONTAINS InterPro DOMAIN/s: Peptidase aspartic (InterPro:IPR021109), Peptidase aspartic, catalytic (InterPro:IPR009007), Peptidase A1 (InterPro:IPR001461); BE…	Aspartic peptidase | Aspartic peptidase domain	NO
AT1G03230	0.518265	4.52966	7.32558e-06	0.000100054	UP	Eukaryotic aspartyl protease family protein	Eukaryotic aspartyl protease family protein; FUNCTIONS IN: aspartic-type endopeptidase activity; INVOLVED IN: response to salt stress; LOCATED IN: cell wall, plant-type cell wall; EXPRESSED IN: stem, root; CONTAINS InterPro DOMAIN/s: Peptidase aspartic (InterPro:IPR021109), Peptidase aspartic, catalytic (InterPro:IPR009007), Peptidase A1 (InterPro:IPR001461); BEST Arabidopsis thaliana protein mat…	Aspartic peptidase | Aspartic peptidase domain	NO
AT1G03300	1.49404	2.78633	1.65367e-09	4.81811e-08	UP	DOMAIN OF UNKNOWN FUNCTION 724 1	DOMAIN OF UNKNOWN FUNCTION 724 1 (ATDUF1); FUNCTIONS IN: RNA binding; INVOLVED IN: biological_process unknown; LOCATED IN: nucleus; EXPRESSED IN: 30 plant structures; EXPRESSED DURING: 14 growth stages; CONTAINS InterPro DOMAIN/s: Tudor-like, plant (InterPro:IPR014002), Agenet (InterPro:IPR008395), Protein of unknown function DUF724 (InterPro:IPR007930); BEST Arabidopsis thaliana protein match is…	Agenet-like domain | Protein of unknown function DUF724 | Tudor-like, plant	NO
AT1G03310	-0.694427	6.28032	4.39659e-12	1.90827e-10	DOWN	debranching enzyme 1	debranching enzyme 1 (DBE1); FUNCTIONS IN: isoamylase activity, alpha-amylase activity; INVOLVED IN: carbohydrate metabolic process, amylopectin biosynthetic process; LOCATED IN: chloroplast; EXPRESSED IN: 22 plant structures; EXPRESSED DURING: 13 growth stages; CONTAINS InterPro DOMAIN/s: Glycoside hydrolase, family 13, N-terminal (InterPro:IPR004193), Immunoglobulin E-set (InterPro:IPR014756), …	Glycoside hydrolase, catalytic domain | Glycoside hydrolase, family 13 | Glycoside hydrolase, family 13, N-terminal | Glycoside hydrolase, superfamily | Glycosyl hydrolase, family 13, all-beta | Glycosyl hydrolase, family 13, catalytic domain | Immunoglobulin E-set | Immunoglobulin-like fold	NO
AT1G03360	0.530627	2.70354	0.001005	0.00707852	UP	ribosomal RNA processing 4	ribosomal RNA processing 4 (RRP4); FUNCTIONS IN: exonuclease activity; LOCATED IN: mitochondrion; EXPRESSED IN: 20 plant structures; EXPRESSED DURING: 13 growth stages; CONTAINS InterPro DOMAIN/s: Nucleic acid-binding, OB-fold-like (InterPro:IPR016027)	Exosome complex RNA-binding protein 1/RRP40/RRP4 | K Homology domain, type 1 | Nucleic acid-binding, OB-fold | RNA-binding domain, S1	NO
AT1G03410	-2.72134	3.75437	1.23917e-57	3.47803e-54	DOWN	2-oxoglutarate (2OG) and Fe(II)-dependent oxygenase superfamily protein	2A6; FUNCTIONS IN: oxidoreductase activity; LOCATED IN: endomembrane system; EXPRESSED IN: 17 plant structures; EXPRESSED DURING: 10 growth stages; CONTAINS InterPro DOMAIN/s: Oxoglutarate/iron-dependent oxygenase (InterPro:IPR005123); BEST Arabidopsis thaliana protein match is: 2-oxoglutarate (2OG) and Fe(II)-dependent oxygenase superfamily protein (TAIR:AT1G03400.1)	Isopenicillin N synthase-like | Non-haem dioxygenase N-terminal domain | Oxoglutarate/iron-dependent dioxygenase	NO
AT1G03440	-0.575405	5.45853	8.08273e-05	0.000824454	DOWN	Leucine-rich repeat (LRR) family protein	Leucine-rich repeat (LRR) family protein; INVOLVED IN: signal transduction; LOCATED IN: endomembrane system; EXPRESSED IN: 23 plant structures; EXPRESSED DURING: 13 growth stages; CONTAINS InterPro DOMAIN/s: Leucine-rich repeat-containing N-terminal domain, type 2 (InterPro:IPR013210), Leucine-rich repeat (InterPro:IPR001611); BEST Arabidopsis thaliana protein match is: RNI-like superfamily prote…	Leucine rich repeat 4 | Leucine-rich repeat | Leucine-rich repeat-containing N-terminal, type 2	YES	1:854093:C-CT;exonic_variant
AT1G03457	1.52457	2.98014	2.48439e-12	1.12772e-10	UP	RNA-binding (RRM/RBD/RNP motifs) family protein	RNA-binding (RRM/RBD/RNP motifs) family protein; FUNCTIONS IN: RNA binding, nucleotide binding, nucleic acid binding; INVOLVED IN: biological_process unknown; LOCATED IN: cellular_component unknown; EXPRESSED IN: 17 plant structures; EXPRESSED DURING: 14 growth stages; CONTAINS InterPro DOMAIN/s: RNA recognition motif, RNP-1 (InterPro:IPR000504), Ribonucleoprotein, BRUNO-like (InterPro:IPR015903)…	Nucleotide-binding, alpha-beta plait | Paraneoplastic encephalomyelitis antigen | RNA recognition motif domain	YES	1:863646:G-GA;intronic_variant,1:863622:G-GA;intronic_variant,1:863622:G-GA;exonic_variant,1:863646:G-GA;exonic_variant
AT1G03470	1.01582	2.78354	4.38241e-08	9.65364e-07	UP	Kinase interacting (KIP1-like) family protein	Kinase interacting (KIP1-like) family protein; CONTAINS InterPro DOMAIN/s: KIP1-like (InterPro:IPR011684); BEST Arabidopsis thaliana protein match is: Kinase interacting (KIP1-like) family protein (TAIR:AT2G47920.1)	KIP1-like	NO
AT1G03550	-1.6589	3.05978	1.02652e-24	2.28969e-22	DOWN	Secretory carrier membrane protein (SCAMP) family protein	Secretory carrier membrane protein (SCAMP) family protein; FUNCTIONS IN: transmembrane transporter activity; INVOLVED IN: protein transport; LOCATED IN: integral to membrane; EXPRESSED IN: 23 plant structures; EXPRESSED DURING: 15 growth stages; CONTAINS InterPro DOMAIN/s: SCAMP (InterPro:IPR007273); BEST Arabidopsis thaliana protein match is: Secretory carrier membrane protein (SCAMP) family pro…	SCAMP	YES	1:886544:G-GT;splice_donor_region_variant
AT1G03580	1.36178	2.42035	5.56595e-09	1.47728e-07	UP		pseudogene, meprin and TRAF homology (MATH) domain protein -related, weak similarity to ubiquitin-specific protease 12 (Arabidopsis thaliana) GI:11993471; contains weak hit to Pfam PF00917: MATH domain		NO
AT1G03590	0.581084	5.17902	1.55967e-07	3.0738e-06	UP	Protein phosphatase 2C family protein	Protein phosphatase 2C family protein; FUNCTIONS IN: protein serine/threonine phosphatase activity, catalytic activity; INVOLVED IN: N-terminal protein myristoylation; LOCATED IN: plasma membrane; EXPRESSED IN: 23 plant structures; EXPRESSED DURING: 13 growth stages; CONTAINS InterPro DOMAIN/s: Protein phosphatase 2C-related (InterPro:IPR001932), Protein phosphatase 2C (InterPro:IPR015655), Prote…	Protein phosphatase 2C | Protein phosphatase 2C (PP2C)-like domain	YES	1:895475:G-GA;splice_acceptor_region_variant
AT1G03610	0.84382	6.7488	1.32925e-11	5.38107e-10	UP	Protein of unknown function (DUF789)	Protein of unknown function (DUF789); CONTAINS InterPro DOMAIN/s: Protein of unknown function DUF789 (InterPro:IPR008507); BEST Arabidopsis thaliana protein match is: Protein of unknown function (DUF789) (TAIR:AT4G03420.1)	Protein of unknown function DUF789	NO
AT1G03620	0.878007	1.58014	0.000331764	0.00276246	UP	ELMO/CED-12 family protein	ELMO/CED-12 family protein; FUNCTIONS IN: molecular_function unknown; INVOLVED IN: phagocytosis; LOCATED IN: cytoskeleton; EXPRESSED IN: 16 plant structures; EXPRESSED DURING: 6 growth stages; CONTAINS InterPro DOMAIN/s: Engulfment/cell motility, ELMO (InterPro:IPR006816); BEST Arabidopsis thaliana protein match is: ELMO/CED-12 family protein (TAIR:AT3G03610.1)	Engulfment/cell motility, ELMO	YES	1:904216:TG-T;exonic_variant
AT1G03630	-0.251324	7.81079	0.00722019	0.0363532	DOWN	protochlorophyllide oxidoreductase C	protochlorophyllide oxidoreductase C (POR C); FUNCTIONS IN: oxidoreductase activity, NADPH dehydrogenase activity, protochlorophyllide reductase activity; INVOLVED IN: chlorophyll biosynthetic process; LOCATED IN: chloroplast thylakoid membrane, chloroplast; LOCATED IN: chloroplast thylakoid membrane, chloroplast, chloroplast envelope; EXPRESSED IN: 22 plant structures; EXPRESSED DURING: 13 growt…	Glucose/ribitol dehydrogenase | Light-dependent protochlorophyllide reductase | NAD(P)-binding domain | Short-chain dehydrogenase/reductase SDR	NO
AT1G03680	-0.332465	7.89803	0.00041696	0.00336052	DOWN	thioredoxin M-type 1	thioredoxin M-type 1 (THM1); FUNCTIONS IN: enzyme activator activity; INVOLVED IN: response to oxidative stress, response to cold, positive regulation of catalytic activity; LOCATED IN: thylakoid, apoplast, stromule, chloroplast, chloroplast stroma; EXPRESSED IN: 24 plant structures; EXPRESSED DURING: 14 growth stages; CONTAINS InterPro DOMAIN/s: Thioredoxin fold (InterPro:IPR012335), Thioredoxin…	Thioredoxin | Thioredoxin domain | Thioredoxin, conserved site | Thioredoxin-like fold	NO
AT1G03710	-2.45237	-3.05682	0.00869441	0.0424454	DOWN	Cystatin/monellin superfamily protein	Cystatin/monellin superfamily protein; FUNCTIONS IN: cysteine-type endopeptidase inhibitor activity; INVOLVED IN: biological_process unknown; LOCATED IN: cellular_component unknown; EXPRESSED IN: 10 plant structures; EXPRESSED DURING: 8 growth stages; CONTAINS InterPro DOMAIN/s: Proteinase inhibitor I25, cystatin (InterPro:IPR000010), Proteinase inhibitor I25, cystatin, conserved region (InterPro…	Cystatin-related, plant | Proteinase inhibitor I25, cystatin | Proteinase inhibitor I25, cystatin, conserved region	NO
AT1G03740	0.299982	4.99348	0.00817416	0.0403213	UP	Protein kinase superfamily protein	Protein kinase superfamily protein; FUNCTIONS IN: protein serine/threonine kinase activity, protein kinase activity, kinase activity, ATP binding; INVOLVED IN: protein amino acid phosphorylation; INVOLVED IN: protein amino acid phosphorylation, N-terminal protein myristoylation; EXPRESSED IN: 24 plant structures; EXPRESSED DURING: 13 growth stages; CONTAINS InterPro DOMAIN/s: Protein kinase, ATP …	Protein kinase domain | Protein kinase, ATP binding site | Protein kinase-like domain | Serine/threonine-protein kinase, active site | Serine/threonine/dual specificity protein kinase, catalytic domain	NO
AT1G03760	0.509103	3.21582	0.00153141	0.01008	UP	Prefoldin chaperone subunit family protein	Prefoldin chaperone subunit family protein; FUNCTIONS IN: unfolded protein binding; INVOLVED IN: protein folding; LOCATED IN: prefoldin complex; EXPRESSED IN: pollen tube; CONTAINS InterPro DOMAIN/s: Prefoldin alpha-like (InterPro:IPR004127), Prefoldin (InterPro:IPR009053)	Prefoldin | Prefoldin alpha-like	NO
AT1G03850	0.734169	2.86303	0.000515707	0.00401806	UP	Glutaredoxin family protein	Glutaredoxin family protein; FUNCTIONS IN: electron carrier activity, protein disulfide oxidoreductase activity; INVOLVED IN: response to cytokinin stimulus; EXPRESSED IN: 14 plant structures; EXPRESSED DURING: 9 growth stages; CONTAINS InterPro DOMAIN/s: Glutaredoxin-like, plant II (InterPro:IPR011905), Thioredoxin fold (InterPro:IPR012335), Glutaredoxin (InterPro:IPR002109), Thioredoxin-like fo…	Glutaredoxin | Glutaredoxin-like, plant II | Thioredoxin-like fold	NO
AT1G03870	2.99875	6.20288	9.54596e-13	4.64714e-11	UP	FASCICLIN-like arabinoogalactan 9	FASCICLIN-like arabinoogalactan 9 (FLA9); LOCATED IN: anchored to plasma membrane, plasma membrane, anchored to membrane; EXPRESSED IN: 23 plant structures; EXPRESSED DURING: 14 growth stages; CONTAINS InterPro DOMAIN/s: FAS1 domain (InterPro:IPR000782); BEST Arabidopsis thaliana protein match is: FASCICLIN-like arabinogalactan protein 13 precursor (TAIR:AT5G44130.1)	FAS1 domain	NO
AT1G03910	0.495541	5.85951	2.92636e-07	5.44846e-06	UP		EXPRESSED IN: 24 plant structures; EXPRESSED IN: 25 plant structures; EXPRESSED DURING: 13 growth stages; CONTAINS InterPro DOMAIN/s: Cactin protein, cactus-binding domain, C-terminal (InterPro:IPR019134), Cactin, central region (InterPro:IPR018816); BEST Arabidopsis thaliana protein match is: unknown protein (TAIR:AT2G36815.2)	Cactin, C-terminal | Cactin, central domain	NO
AT1G03930	-0.327535	5.21665	0.00146565	0.00971171	DOWN	dual specificity kinase 1	dual specificity kinase 1 (ADK1); CONTAINS InterPro DOMAIN/s: Protein kinase, ATP binding site (InterPro:IPR017441), Protein kinase, catalytic domain (InterPro:IPR000719), Serine/threonine-protein kinase-like domain (InterPro:IPR017442), Protein kinase-like domain (InterPro:IPR011009), Serine/threonine-protein kinase, active site (InterPro:IPR008271); BEST Arabidopsis thaliana protein match is: c…	Protein kinase domain | Protein kinase, ATP binding site | Protein kinase-like domain | Serine/threonine-protein kinase, active site	NO
AT1G03935	-0.757251	0.867972	0.00335593	0.0193712	DOWN	snoRNA	snoRNA		NO
AT1G03970	0.649686	5.00325	5.27921e-11	1.9561e-09	UP	G-box binding factor 4	G-box binding factor 4 (GBF4); FUNCTIONS IN: sequence-specific DNA binding, DNA binding, sequence-specific DNA binding transcription factor activity; INVOLVED IN: regulation of transcription, DNA-dependent; LOCATED IN: nucleus; EXPRESSED IN: 22 plant structures; EXPRESSED DURING: 13 growth stages; CONTAINS InterPro DOMAIN/s: Basic-leucine zipper (bZIP) transcription factor (InterPro:IPR004827), b…	Basic-leucine zipper domain	NO
AT1G04000	-1.15067	3.16807	1.69056e-12	7.9083e-11	DOWN		unknown protein; BEST Arabidopsis thaliana protein match is: unknown protein (TAIR:AT5G44060.1)		NO
AT1G04020	-0.575774	2.43679	0.0104703	0.0495505	DOWN	breast cancer associated RING 1	breast cancer associated RING 1 (BARD1); FUNCTIONS IN: transcription coactivator activity, DNA binding; INVOLVED IN: DNA repair, regulation of meristem structural organization, leaf development; LOCATED IN: intracellular; EXPRESSED IN: 21 plant structures; EXPRESSED DURING: 12 growth stages; CONTAINS InterPro DOMAIN/s: Zinc finger, RING-type, conserved site (InterPro:IPR017907), Zinc finger, RING…	BRCT domain | Breast cancer type 1 susceptibility protein (BRCA1) | Zinc finger, PHD-type | Zinc finger, RING-type | Zinc finger, RING-type, conserved site | Zinc finger, RING/FYVE/PHD-type	NO
AT1G04040	1.05095	4.78568	4.31495e-07	7.75931e-06	UP	HAD superfamily, subfamily IIIB acid phosphatase	HAD superfamily, subfamily IIIB acid phosphatase ; FUNCTIONS IN: acid phosphatase activity; INVOLVED IN: biological_process unknown; LOCATED IN: cell wall, plasma membrane, vacuole, plant-type cell wall; EXPRESSED IN: 19 plant structures; EXPRESSED DURING: 9 growth stages; CONTAINS InterPro DOMAIN/s: Acid phosphatase (Class B) (InterPro:IPR005519), Vegetative storage protein/acid phosphatase (Int…	Acid phosphatase (Class B) | Acid phosphatase, plant | HAD-like domain | Vegetative storage protein/acid phosphatase	NO
AT1G04090	-2.08025	-1.86735	0.000368872	0.00301846	DOWN	Plant protein of unknown function (DUF946)	Plant protein of unknown function (DUF946); CONTAINS InterPro DOMAIN/s: Protein of unknown function DUF946 (InterPro:IPR009291); BEST Arabidopsis thaliana protein match is: Plant protein of unknown function (DUF946) (TAIR:AT5G43950.1)	Vacuolar protein sorting-associated protein 62	YES	1:1058892:G-A;protein_coding;missense;AGG>AAG;R>K
AT1G04130	0.44552	3.49937	0.000726607	0.00537629	UP	Tetratricopeptide repeat (TPR)-like superfamily protein	Tetratricopeptide repeat (TPR)-like superfamily protein; FUNCTIONS IN: binding; INVOLVED IN: biological_process unknown; LOCATED IN: cellular_component unknown; EXPRESSED IN: 22 plant structures; EXPRESSED DURING: 13 growth stages; CONTAINS InterPro DOMAIN/s: Tetratricopeptide-like helical (InterPro:IPR011990), Tetratricopeptide repeat-containing (InterPro:IPR013026), Tetratricopeptide repeat (In…	Tetratricopeptide repeat-containing domain | Tetratricopeptide-like helical domain	NO
AT1G04190	0.373463	4.45398	0.000615356	0.00466272	UP	Tetratricopeptide repeat (TPR)-like superfamily protein	Tetratricopeptide repeat (TPR)-like superfamily protein; FUNCTIONS IN: binding; INVOLVED IN: biological_process unknown; LOCATED IN: cellular_component unknown; EXPRESSED IN: 22 plant structures; EXPRESSED DURING: 13 growth stages; CONTAINS InterPro DOMAIN/s: Tetratricopeptide TPR-1 (InterPro:IPR001440), Tetratricopeptide-like helical (InterPro:IPR011990), Tetratricopeptide repeat-containing (Int…	Tetratricopeptide TPR1 | Tetratricopeptide repeat | Tetratricopeptide repeat-containing domain | Tetratricopeptide-like helical domain	NO
AT1G04220	-0.524859	4.70586	0.00285274	0.0169758	DOWN	3-ketoacyl-CoA synthase 2	3-ketoacyl-CoA synthase 2 (KCS2); FUNCTIONS IN: fatty acid elongase activity; INVOLVED IN: response to wounding, response to osmotic stress, suberin biosynthetic process; LOCATED IN: membrane; EXPRESSED IN: 17 plant structures; EXPRESSED DURING: 6 growth stages; CONTAINS InterPro DOMAIN/s: Thiolase-like (InterPro:IPR016039), Very-long-chain 3-ketoacyl-CoA synthase (InterPro:IPR012392), 3-Oxoacyl-…	3-Oxoacyl-[acyl-carrier-protein (ACP)] synthase III C-terminal | FAE1/Type III polyketide synthase-like protein | Thiolase-like | Thiolase-like, subgroup | Very-long-chain 3-ketoacyl-CoA synthase	NO
AT1G04240	1.41288	5.56013	2.4745e-12	1.12475e-10	UP	AUX/IAA transcriptional regulator family protein	SHORT HYPOCOTYL 2 (SHY2); FUNCTIONS IN: sequence-specific DNA binding transcription factor activity; INVOLVED IN: response to auxin stimulus, response to cyclopentenone, response to brassinosteroid stimulus; LOCATED IN: nucleus; EXPRESSED IN: 22 plant structures; EXPRESSED DURING: 13 growth stages; CONTAINS InterPro DOMAIN/s: Aux/IAA-ARF-dimerisation (InterPro:IPR011525), AUX/IAA protein (InterPr…		NO
AT1G04290	-0.444702	3.65791	0.00136438	0.00912682	DOWN	Thioesterase superfamily protein	Thioesterase superfamily protein; FUNCTIONS IN: hydrolase activity, acting on ester bonds, acyl-CoA thioesterase activity; INVOLVED IN: biological_process unknown; LOCATED IN: peroxisome; EXPRESSED IN: 24 plant structures; EXPRESSED DURING: 15 growth stages; CONTAINS InterPro DOMAIN/s: Thioesterase superfamily (InterPro:IPR006683), Phenylacetic acid degradation-related protein (InterPro:IPR003736…	HotDog domain | Phenylacetic acid degradation-related domain | Thioesterase superfamily	NO
AT1G04300	0.416979	6.47508	1.70454e-05	0.000210526	UP	TRAF-like superfamily protein	TRAF-like superfamily protein; CONTAINS InterPro DOMAIN/s: TRAF-like (InterPro:IPR008974), MATH (InterPro:IPR002083), TRAF-type (InterPro:IPR013322); FUNCTIONS IN: molecular_function unknown; INVOLVED IN: biological_process unknown; EXPRESSED IN: 24 plant structures; LOCATED IN: endomembrane system; EXPRESSED DURING: 15 growth stages; CONTAINS InterPro DOMAIN/s: TRAF-like (InterPro:IPR008974), MA…	MATH | TRAF-like	NO
AT1G04310	0.345953	5.40606	0.0105001	0.0496566	UP	ethylene response sensor 2	ethylene response sensor 2 (ERS2); FUNCTIONS IN: ethylene binding, protein histidine kinase activity, receptor activity, glycogen synthase kinase 3 activity; INVOLVED IN: negative regulation of ethylene mediated signaling pathway; LOCATED IN: endomembrane system, membrane; EXPRESSED IN: 22 plant structures; EXPRESSED DURING: 9 growth stages; CONTAINS InterPro DOMAIN/s: Signal transduction histidi…	GAF domain | GAF domain-like | Signal transduction histidine kinase EnvZ-like, dimerisation/phosphoacceptor domain | Signal transduction histidine kinase, homodimeric domain	NO
AT1G04330	0.72434	0.6793	0.00303945	0.0178722	UP		unknown protein; FUNCTIONS IN: molecular_function unknown; INVOLVED IN: biological_process unknown; LOCATED IN: chloroplast; BEST Arabidopsis thaliana protein match is: unknown protein (TAIR:AT3G23170.1)		NO
AT1G04350	-0.977692	6.55368	2.05716e-25	4.84525e-23	DOWN	2-oxoglutarate (2OG) and Fe(II)-dependent oxygenase superfamily protein	2-oxoglutarate (2OG) and Fe(II)-dependent oxygenase superfamily protein; CONTAINS InterPro DOMAIN/s: Oxoglutarate/iron-dependent oxygenase (InterPro:IPR005123); BEST Arabidopsis thaliana protein match is: 2-oxoglutarate (2OG) and Fe(II)-dependent oxygenase superfamily protein (TAIR:AT5G59540.1)	Isopenicillin N synthase-like | Non-haem dioxygenase N-terminal domain | Oxoglutarate/iron-dependent dioxygenase	NO
AT1G04420	-0.269226	6.88274	0.00272279	0.0162946	DOWN	NAD(P)-linked oxidoreductase superfamily protein	NAD(P)-linked oxidoreductase superfamily protein; FUNCTIONS IN: oxidoreductase activity, aldo-keto reductase activity; INVOLVED IN: oxidation reduction; LOCATED IN: chloroplast, chloroplast stroma, chloroplast envelope; EXPRESSED IN: 23 plant structures; EXPRESSED DURING: 13 growth stages; CONTAINS InterPro DOMAIN/s: Aldo/keto reductase (InterPro:IPR001395); BEST Arabidopsis thaliana protein matc…	Aldo/keto reductase | NADP-dependent oxidoreductase domain	NO
AT1G04430	1.0223	6.49547	9.50985e-15	6.21944e-13	UP	S-adenosyl-L-methionine-dependent methyltransferases superfamily protein	S-adenosyl-L-methionine-dependent methyltransferases superfamily protein; INVOLVED IN: biological_process unknown; LOCATED IN: Golgi apparatus, plasma membrane; EXPRESSED IN: 26 plant structures; EXPRESSED DURING: 15 growth stages; CONTAINS InterPro DOMAIN/s: Protein of unknown function DUF248, methyltransferase putative (InterPro:IPR004159); BEST Arabidopsis thaliana protein match is: S-adenosyl…	Putative S-adenosyl-L-methionine-dependent methyltransferase | S-adenosyl-L-methionine-dependent methyltransferase-like	NO
AT1G04440	0.314778	6.56812	0.000666911	0.00500086	UP	casein kinase like 13	casein kinase like 13 (CKL13); FUNCTIONS IN: protein serine/threonine kinase activity, protein kinase activity, kinase activity, ATP binding; INVOLVED IN: protein amino acid phosphorylation; LOCATED IN: cellular_component unknown; EXPRESSED IN: 22 plant structures; EXPRESSED DURING: 12 growth stages; CONTAINS InterPro DOMAIN/s: Protein kinase, ATP binding site (InterPro:IPR017441), Protein kinase…	Protein kinase domain | Protein kinase, ATP binding site | Protein kinase-like domain | Serine/threonine-protein kinase, active site	NO
AT1G04445	-4.5764	-3.57586	0.0102986	0.0488623	DOWN	C2H2-like zinc finger protein	C2H2-like zinc finger protein; FUNCTIONS IN: zinc ion binding, nucleic acid binding; INVOLVED IN: biological_process unknown; LOCATED IN: intracellular; CONTAINS InterPro DOMAIN/s: Zinc finger, C2H2-like (InterPro:IPR015880), Zinc finger, C2H2-type (InterPro:IPR007087)	Zinc finger, C2H2 | Zinc finger, C2H2-like	NO
AT1G04530	-0.528742	5.86846	8.60433e-08	1.7889e-06	DOWN	Tetratricopeptide repeat (TPR)-like superfamily protein	Tetratricopeptide repeat (TPR)-like superfamily protein; FUNCTIONS IN: binding; EXPRESSED IN: 22 plant structures; EXPRESSED DURING: 13 growth stages; CONTAINS InterPro DOMAIN/s: Tetratricopeptide-like helical (InterPro:IPR011990), Tetratricopeptide repeat-containing (InterPro:IPR013026); BEST Arabidopsis thaliana protein match is: Tetratricopeptide repeat (TPR)-like superfamily protein (TAIR:AT4…	Tetratricopeptide repeat | Tetratricopeptide repeat-containing domain | Tetratricopeptide-like helical domain	NO
AT1G04550	-0.480106	4.43911	8.33477e-06	0.000112244	DOWN	AUX/IAA transcriptional regulator family protein	indole-3-acetic acid inducible 12 (IAA12); FUNCTIONS IN: transcription repressor activity, sequence-specific DNA binding transcription factor activity; INVOLVED IN: xylem and phloem pattern formation, response to auxin stimulus, embryonic pattern specification, root development; LOCATED IN: nucleus; EXPRESSED IN: 22 plant structures; EXPRESSED DURING: 13 growth stages; CONTAINS InterPro DOMAIN/s:…	AUX/IAA protein | Aux/IAA-ARF-dimerisation	NO
AT1G04590	-0.35817	4.08949	0.00621553	0.0321575	DOWN		BEST Arabidopsis thaliana protein match is: Pentatricopeptide repeat (PPR) superfamily protein (TAIR:AT4G18975.4); BEST Arabidopsis thaliana protein match is: Pentatricopeptide repeat (PPR) superfamily protein (TAIR:AT4G21190.1)		NO
AT1G04620	0.644297	3.01145	5.36273e-05	0.000578176	UP	coenzyme F420 hydrogenase family / dehydrogenase, beta subunit family	coenzyme F420 hydrogenase family / dehydrogenase, beta subunit family; FUNCTIONS IN: coenzyme F420 hydrogenase activity; INVOLVED IN: biological_process unknown; LOCATED IN: chloroplast; EXPRESSED IN: 22 plant structures; EXPRESSED DURING: 13 growth stages; CONTAINS InterPro DOMAIN/s: Coenzyme F420 hydrogenase/dehydrogenase beta subunit, C-terminal (InterPro:IPR007525), Coenzyme F420 hydrogenase/…	Coenzyme F420 hydrogenase/dehydrogenase beta subunit, C-terminal | Coenzyme F420 hydrogenase/dehydrogenase beta subunit, N-terminal	NO
AT1G04640	-0.281739	4.59427	0.00782849	0.0388905	DOWN	lipoyltransferase 2	lipoyltransferase 2 (LIP2); CONTAINS InterPro DOMAIN/s: Octanoyltransferase (InterPro:IPR000544), Octanoyltransferase, conserved site (InterPro:IPR020605), Biotin/lipoate A/B protein ligase (InterPro:IPR004143); BEST Arabidopsis thaliana protein match is: Biotin/lipoate A/B protein ligase family (TAIR:AT4G31050.1)	Biotin/lipoate A/B protein ligase | Octanoyltransferase | Octanoyltransferase, conserved site	NO
AT1G04650	-0.627729	2.03811	0.000508884	0.00397765	DOWN		unknown protein	Protein of unknown function DUF4487	NO
AT1G04680	0.477304	4.937	0.00512158	0.0274988	UP	Pectin lyase-like superfamily protein	Pectin lyase-like superfamily protein; FUNCTIONS IN: lyase activity, pectate lyase activity; INVOLVED IN: biological_process unknown; LOCATED IN: membrane; EXPRESSED IN: 23 plant structures; EXPRESSED DURING: 13 growth stages; CONTAINS InterPro DOMAIN/s: Pectin lyase fold/virulence factor (InterPro:IPR011050), AmbAllergen (InterPro:IPR018082), Pectate lyase/Amb allergen (InterPro:IPR002022), Pect…	AmbAllergen | Pectate lyase/Amb allergen | Pectin lyase fold | Pectin lyase fold/virulence factor	NO
AT1G04780	0.316365	5.86216	0.00138608	0.00925181	UP	Ankyrin repeat family protein	Ankyrin repeat family protein; FUNCTIONS IN: molecular_function unknown; INVOLVED IN: biological_process unknown; LOCATED IN: plasma membrane; EXPRESSED IN: 24 plant structures; EXPRESSED DURING: 13 growth stages; CONTAINS InterPro DOMAIN/s: Ankyrin repeat-containing domain (InterPro:IPR020683), Protein of unknown function DUF3424 (InterPro:IPR021832), Ankyrin repeat (InterPro:IPR002110); BEST Ar…	Ankyrin repeat | Ankyrin repeat domain-containing protein 13 | Ankyrin repeat-containing domain	NO
AT1G04810	0.305571	5.90212	0.00245492	0.0149384	UP	26S proteasome regulatory complex, non-ATPase subcomplex, Rpn2/Psmd1 subunit	26S proteasome regulatory complex, non-ATPase subcomplex, Rpn2/Psmd1 subunit; FUNCTIONS IN: enzyme regulator activity, binding; INVOLVED IN: protein catabolic process, ubiquitin-dependent protein catabolic process; LOCATED IN: proteasome regulatory particle, base subcomplex, proteasome complex, nucleus, plasma membrane; EXPRESSED IN: 23 plant structures; EXPRESSED DURING: 13 growth stages; CONTAI…	26S proteasome regulatory complex, non-ATPase subcomplex, Rpn2/Psmd1 subunit | Armadillo-like helical | Armadillo-type fold | Proteasome/cyclosome repeat	NO
AT1G04840	0.712414	0.879804	0.00344156	0.019801	UP	Tetratricopeptide repeat (TPR)-like superfamily protein	Tetratricopeptide repeat (TPR)-like superfamily protein; CONTAINS InterPro DOMAIN/s: Pentatricopeptide repeat (InterPro:IPR002885); BEST Arabidopsis thaliana protein match is: Tetratricopeptide repeat (TPR)-like superfamily protein (TAIR:AT1G74630.1)	Pentatricopeptide repeat | Tetratricopeptide-like helical domain	NO
AT1G04860	0.459922	5.19266	5.22111e-05	0.000565259	UP	ubiquitin-specific protease 2	ubiquitin-specific protease 2 (UBP2); FUNCTIONS IN: ubiquitin-specific protease activity; INVOLVED IN: ubiquitin-dependent protein catabolic process; LOCATED IN: proteasome complex, chloroplast; EXPRESSED IN: 24 plant structures; EXPRESSED DURING: 13 growth stages; CONTAINS InterPro DOMAIN/s: Zinc finger, UBP-type (InterPro:IPR001607), Peptidase C19, ubiquitin carboxyl-terminal hydrolase 2, conse…	Peptidase C19, ubiquitin carboxyl-terminal hydrolase | Peptidase C19, ubiquitin carboxyl-terminal hydrolase, conserved site | Ubiquitin carboxyl-terminal hydrolase-like domain | Zinc finger, RING/FYVE/PHD-type | Zinc finger, UBP-type	NO
AT1G04870	0.472192	4.80744	0.000617063	0.0046725	UP	protein arginine methyltransferase 10	protein arginine methyltransferase 10 (PRMT10); FUNCTIONS IN: histone-arginine N-methyltransferase activity, methyltransferase activity, protein-arginine omega-N asymmetric methyltransferase activity, [myelin basic protein]-arginine N-methyltransferase activity, protein-arginine omega-N monomethyltransferase activity; FUNCTIONS IN: methyltransferase activity; INVOLVED IN: vegetative to reproducti…	Protein arginine N-methyltransferase | S-adenosyl-L-methionine-dependent methyltransferase-like	NO
AT1G04880	-1.37556	-1.54361	0.00460632	0.0252237	DOWN	HMG (high mobility group) box protein with ARID/BRIGHT DNA-binding domain	HMG (high mobility group) box protein with ARID/BRIGHT DNA-binding domain; FUNCTIONS IN: sequence-specific DNA binding transcription factor activity; INVOLVED IN: regulation of transcription; LOCATED IN: intracellular, nucleus; EXPRESSED IN: 10 plant structures; EXPRESSED DURING: 7 growth stages; CONTAINS InterPro DOMAIN/s: High mobility group, superfamily (InterPro:IPR009071), High mobility grou…	ARID/BRIGHT DNA-binding domain | High mobility group box domain	YES	1:1377051:C-CA;intronic_variant
AT1G04910	0.292271	5.06119	0.00307183	0.0180374	UP	O-fucosyltransferase family protein	O-fucosyltransferase family protein; CONTAINS InterPro DOMAIN/s: GDP-fucose protein O-fucosyltransferase (InterPro:IPR019378); BEST Arabidopsis thaliana protein match is: O-fucosyltransferase family protein (TAIR:AT1G22460.1)	GDP-fucose protein O-fucosyltransferase | O-fucosyltransferase, plant	NO
AT1G04940	-0.351768	5.57913	0.000313385	0.00262687	DOWN	translocon at the inner envelope membrane of chloroplasts 20	translocon at the inner envelope membrane of chloroplasts 20 (TIC20); CONTAINS InterPro DOMAIN/s: Uncharacterised conserved protein ycf60 (InterPro:IPR019109), Chloroplast protein import component Tic20 (InterPro:IPR005691); BEST Arabidopsis thaliana protein match is: HIT-type Zinc finger family protein (TAIR:AT1G04945.3)	Chloroplast protein import component Tic20	NO
AT1G05020	1.63116	2.02818	1.10365e-12	5.31031e-11	UP	ENTH/ANTH/VHS superfamily protein	ENTH/ANTH/VHS superfamily protein; FUNCTIONS IN: phospholipid binding, clathrin binding, binding, phosphatidylinositol binding; INVOLVED IN: clathrin coat assembly; LOCATED IN: clathrin coat; EXPRESSED IN: 11 plant structures; EXPRESSED DURING: L mature pollen stage, M germinated pollen stage, 4 anthesis, petal differentiation and expansion stage, LP.08 eight leaves visible; CONTAINS InterPro DOM…	AP180 N-terminal homology (ANTH) domain | Clathrin adaptor, phosphoinositide-binding, GAT-like | ENTH/VHS | Epsin-like, N-terminal	NO
AT1G05065	-1.09647	0.289853	7.01384e-05	0.000728665	DOWN	CLAVATA3/ESR-RELATED 20	CLAVATA3/ESR-RELATED 20 (CLE20)		NO
AT1G05140	-0.64801	6.28734	3.9019e-11	1.47167e-09	DOWN	Peptidase M50 family protein	Peptidase M50 family protein; FUNCTIONS IN: metalloendopeptidase activity; INVOLVED IN: proteolysis; LOCATED IN: chloroplast, plastid; EXPRESSED IN: 22 plant structures; EXPRESSED DURING: 13 growth stages; CONTAINS InterPro DOMAIN/s: Peptidase M50 (InterPro:IPR008915), PDZ/DHR/GLGF (InterPro:IPR001478), Peptidase M50, putative membrane-associated zinc metallopeptidase (InterPro:IPR004387); BEST A…	PDZ domain | Peptidase M50	NO
AT1G05170	-0.865542	4.35454	1.2933e-10	4.53273e-09	DOWN	Galactosyltransferase family protein	Galactosyltransferase family protein; FUNCTIONS IN: transferase activity, transferring hexosyl groups, transferase activity, transferring glycosyl groups; INVOLVED IN: protein amino acid glycosylation; LOCATED IN: endomembrane system, membrane; LOCATED IN: membrane; EXPRESSED IN: 14 plant structures; EXPRESSED DURING: 4 anthesis, C globular stage, 4 leaf senescence stage, petal differentiation an…	Domain of unknown function DUF4094 | Glycosyl transferase, family 31	NO
AT1G05180	0.539385	5.05718	3.36755e-07	6.19456e-06	UP	NAD(P)-binding Rossmann-fold superfamily protein	AUXIN RESISTANT 1 (AXR1); CONTAINS InterPro DOMAIN/s: Molybdenum cofactor biosynthesis, MoeB (InterPro:IPR009036), NAD(P)-binding domain (InterPro:IPR016040); CONTAINS InterPro DOMAIN/s: Molybdenum cofactor biosynthesis, MoeB (InterPro:IPR009036), UBA/THIF-type NAD/FAD binding fold (InterPro:IPR000594), NAD(P)-binding domain (InterPro:IPR016040); BEST Arabidopsis thaliana protein match is: AXR1-l…	Molybdenum cofactor biosynthesis, MoeB | NAD(P)-binding domain | UBA/THIF-type NAD/FAD binding fold	NO
AT1G05200	-0.36727	5.55764	0.000173104	0.00157662	DOWN	glutamate receptor 3.4	glutamate receptor 3.4 (GLR3.4); FUNCTIONS IN: protein binding, intracellular ligand-gated ion channel activity; INVOLVED IN: cellular calcium ion homeostasis, response to light stimulus; LOCATED IN: integral to membrane, membrane; EXPRESSED IN: 20 plant structures; EXPRESSED DURING: 13 growth stages; CONTAINS InterPro DOMAIN/s: Extracellular solute-binding protein, family 3 (InterPro:IPR001638),…	Extracellular ligand-binding receptor | Extracellular solute-binding protein, family 3 | Ionotropic glutamate receptor | Ionotropic glutamate receptor, plant | Periplasmic binding protein-like I	NO
AT1G05260	0.961393	3.95129	1.09026e-07	2.22317e-06	UP	Peroxidase superfamily protein	RARE COLD INDUCIBLE GENE 3 (RCI3); FUNCTIONS IN: peroxidase activity; INVOLVED IN: response to desiccation, response to cold, hyperosmotic salinity response; LOCATED IN: endoplasmic reticulum; EXPRESSED IN: 12 plant structures; EXPRESSED DURING: 4 anthesis, petal differentiation and expansion stage, E expanded cotyledon stage; CONTAINS InterPro DOMAIN/s: Haem peroxidase (InterPro:IPR010255), Plan…	Haem peroxidase | Haem peroxidase, plant/fungal/bacterial | Peroxidase, active site | Peroxidases heam-ligand binding site | Plant peroxidase	NO
AT1G05270	0.373879	5.08321	0.000274063	0.00234639	UP	TraB family protein	TraB family protein; CONTAINS InterPro DOMAIN/s: Pheromone shutdown-related, TraB (InterPro:IPR002816); BEST Arabidopsis thaliana protein match is: TraB family protein (TAIR:AT2G32340.1)	Pheromone shutdown, TraB	NO
AT1G05280	1.54267	-1.5349	0.00261485	0.0157438	UP	Protein of unknown function (DUF604)	Protein of unknown function (DUF604); CONTAINS InterPro DOMAIN/s: Protein of unknown function DUF604 (InterPro:IPR006740); BEST Arabidopsis thaliana protein match is: Protein of unknown function (DUF604) (TAIR:AT4G15240.1)	Protein of unknown function DUF604	NO
AT1G05310	-1.47781	2.4695	8.77873e-06	0.000117612	DOWN	Pectin lyase-like superfamily protein	Pectin lyase-like superfamily protein; FUNCTIONS IN: pectinesterase activity; INVOLVED IN: cell wall modification; LOCATED IN: endomembrane system, cell wall, plant-type cell wall; EXPRESSED IN: 12 plant structures; EXPRESSED DURING: 6 growth stages; CONTAINS InterPro DOMAIN/s: Pectinesterase, active site (InterPro:IPR018040), Pectin lyase fold/virulence factor (InterPro:IPR011050), Pectinesteras…	Pectin lyase fold | Pectin lyase fold/virulence factor | Pectinesterase, active site | Pectinesterase, catalytic	NO
AT1G05385	-0.8963	4.13817	1.30138e-11	5.28093e-10	DOWN	photosystem II 11 kDa protein-related	LOW PSII ACCUMULATION 19 (LPA19); FUNCTIONS IN: molecular_function unknown; INVOLVED IN: photosystem II assembly; LOCATED IN: chloroplast thylakoid lumen, chloroplast; EXPRESSED IN: 24 plant structures; EXPRESSED DURING: 15 growth stages	Photosystem II Pbs27	NO
AT1G05400	-0.995358	-0.290227	0.00175568	0.0113	DOWN		unknown protein; INVOLVED IN: biological_process unknown; LOCATED IN: cellular_component unknown; EXPRESSED IN: sperm cell; BEST Arabidopsis thaliana protein match is: unknown protein (TAIR:AT1G06810.1)		NO
AT1G05560	-1.02574	5.52012	3.41482e-11	1.2996e-09	DOWN	UDP-glucosyltransferase 75B1	UDP-glucosyltransferase 75B1 (UGT75B1); CONTAINS InterPro DOMAIN/s: UDP-glucuronosyl/UDP-glucosyltransferase (InterPro:IPR002213); BEST Arabidopsis thaliana protein match is: UDP-glucosyl transferase 75B2 (TAIR:AT1G05530.1)		NO
AT1G05562	-1.08903	3.96603	1.5552e-15	1.13871e-13	DOWN				NO
AT1G05600	0.563036	3.81836	2.16787e-05	0.000261425	UP	Tetratricopeptide repeat (TPR)-like superfamily protein	Tetratricopeptide repeat (TPR)-like superfamily protein; FUNCTIONS IN: molecular_function unknown; INVOLVED IN: biological_process unknown; LOCATED IN: cellular_component unknown; EXPRESSED IN: 21 plant structures; EXPRESSED DURING: 13 growth stages; CONTAINS InterPro DOMAIN/s: Pentatricopeptide repeat (InterPro:IPR002885); BEST Arabidopsis thaliana protein match is: Pentatricopeptide repeat (PPR…	Pentatricopeptide repeat | Tetratricopeptide-like helical domain	NO
AT1G05630	0.608825	3.91046	1.27668e-05	0.000164122	UP	Endonuclease/exonuclease/phosphatase family protein	5PTASE13; CONTAINS InterPro DOMAIN/s: Inositol polyphosphate related phosphatase (InterPro:IPR000300), WD40 repeat-like-containing domain (InterPro:IPR011046), WD40/YVTN repeat-like-containing domain (InterPro:IPR015943), WD40 repeat (InterPro:IPR001680), Endonuclease/exonuclease/phosphatase (InterPro:IPR005135); CONTAINS InterPro DOMAIN/s: WD40 repeat-like-containing domain (InterPro:IPR011046),…	Endonuclease/exonuclease/phosphatase | Inositol polyphosphate-related phosphatase | WD40 repeat | WD40/YVTN repeat-like-containing domain	NO
AT1G05660	1.24991	0.00928582	0.000510771	0.00398963	UP	Pectin lyase-like superfamily protein	Pectin lyase-like superfamily protein; FUNCTIONS IN: polygalacturonase activity; INVOLVED IN: carbohydrate metabolic process; LOCATED IN: endomembrane system; CONTAINS InterPro DOMAIN/s: Pectin lyase fold/virulence factor (InterPro:IPR011050), Pectin lyase fold (InterPro:IPR012334), Glycoside hydrolase, family 28 (InterPro:IPR000743), Parallel beta-helix repeat (InterPro:IPR006626); BEST Arabidop…	Glycoside hydrolase, family 28 | Parallel beta-helix repeat | Pectin lyase fold | Pectin lyase fold/virulence factor	NO
AT1G05670	-0.523956	2.95162	0.00480093	0.0261017	DOWN	Pentatricopeptide repeat (PPR-like) superfamily protein	Pentatricopeptide repeat (PPR-like) superfamily protein; CONTAINS InterPro DOMAIN/s: Pentatricopeptide repeat (InterPro:IPR002885); BEST Arabidopsis thaliana protein match is: Tetratricopeptide repeat (TPR)-like superfamily protein (TAIR:AT5G01110.1)	Pentatricopeptide repeat | Tetratricopeptide-like helical domain	NO
AT1G05680	-1.1589	3.39138	0.00296791	0.017525	DOWN	Uridine diphosphate glycosyltransferase 74E2	Uridine diphosphate glycosyltransferase 74E2 (UGT74E2); CONTAINS InterPro DOMAIN/s: UDP-glucuronosyl/UDP-glucosyltransferase (InterPro:IPR002213); BEST Arabidopsis thaliana protein match is: UDP-Glycosyltransferase superfamily protein (TAIR:AT1G05675.1)	UDP-glucuronosyl/UDP-glucosyltransferase	NO
AT1G05690	-1.03625	2.69893	2.17981e-10	7.29804e-09	DOWN	BTB and TAZ domain protein 3	BTB and TAZ domain protein 3 (BT3); FUNCTIONS IN: transcription regulator activity; INVOLVED IN: embryo sac development, pollen development; LOCATED IN: nucleus, chloroplast; EXPRESSED IN: 15 plant structures; EXPRESSED DURING: 8 growth stages; CONTAINS InterPro DOMAIN/s: BTB/POZ (InterPro:IPR013069), Zinc finger, TAZ-type (InterPro:IPR000197), BTB/POZ fold (InterPro:IPR011333), Kelch related (In…	BTB/POZ | BTB/POZ fold | BTB/POZ-like | Zinc finger, TAZ-type	NO
AT1G05820	-0.866744	1.03707	0.000207915	0.00184343	DOWN	SIGNAL PEPTIDE PEPTIDASE-LIKE 5	SIGNAL PEPTIDE PEPTIDASE-LIKE 5 (SPPL5); FUNCTIONS IN: peptidase activity, aspartic-type endopeptidase activity; INVOLVED IN: proteolysis; LOCATED IN: endomembrane system, integral to membrane; CONTAINS InterPro DOMAIN/s: Protease-associated PA (InterPro:IPR003137), Peptidase A22, presenilin signal peptide (InterPro:IPR006639), Peptidase A22B, signal peptide peptidase (InterPro:IPR007369); BEST A…	Peptidase A22B, signal peptide peptidase | Presenilin/signal peptide peptidase | Protease-associated domain, PA	NO
AT1G05835	-0.655615	3.0074	0.00722555	0.0363718	DOWN	PHD finger protein	PHD finger protein; LOCATED IN: endomembrane system; BEST Arabidopsis thaliana protein match is: unknown protein (TAIR:AT1G32583.1)		NO
AT1G05860	0.385341	3.69706	0.0020794	0.0130082	UP		unknown protein; FUNCTIONS IN: molecular_function unknown; INVOLVED IN: biological_process unknown; LOCATED IN: chloroplast; EXPRESSED IN: 20 plant structures; EXPRESSED DURING: 11 growth stages; BEST Arabidopsis thaliana protein match is: unknown protein (TAIR:AT2G31600.1)	Potential DNA-binding domain	NO
AT1G05870	-0.894661	5.54069	2.91499e-08	6.7017e-07	DOWN	Protein of unknown function (DUF1685)	Protein of unknown function (DUF1685); FUNCTIONS IN: molecular_function unknown; INVOLVED IN: N-terminal protein myristoylation; LOCATED IN: cellular_component unknown; CONTAINS InterPro DOMAIN/s: Protein of unknown function DUF1685 (InterPro:IPR012881); BEST Arabidopsis thaliana protein match is: Protein of unknown function (DUF1685) (TAIR:AT2G31560.2)	Protein of unknown function DUF1685	NO
AT1G05890	0.354656	6.6785	0.000168748	0.00154152	UP	RING/U-box superfamily protein	ARIADNE 5 (ARI5); FUNCTIONS IN: zinc ion binding; FUNCTIONS IN: zinc ion binding, nucleic acid binding; EXPRESSED IN: 23 plant structures; EXPRESSED IN: 24 plant structures; EXPRESSED DURING: 15 growth stages; CONTAINS InterPro DOMAIN/s: Zinc finger, C6HC-type (InterPro:IPR002867), Zinc finger, RING-type (InterPro:IPR001841); CONTAINS InterPro DOMAIN/s: Zinc finger, C6HC-type (InterPro:IPR002867)…	Zinc finger, C6HC-type | Zinc finger, CCHC-type | Zinc finger, RING-type | Zinc finger, RING/FYVE/PHD-type	NO
AT1G05900	-0.945135	4.59516	1.68867e-17	1.58872e-15	DOWN	endonuclease III 2	endonuclease III 2 (NTH2); CONTAINS InterPro DOMAIN/s: DNA glycosylase (InterPro:IPR011257), Helix-hairpin-helix DNA-binding motif, class 1 (InterPro:IPR003583), Endonuclease III, conserved site-2 (InterPro:IPR004036), Helix-hairpin-helix motif (InterPro:IPR000445), HhH-GPD domain (InterPro:IPR003265); CONTAINS InterPro DOMAIN/s: DNA glycosylase (InterPro:IPR011257), Helix-hairpin-helix DNA-bindi…	DNA glycosylase | Endonuclease III-like, conserved site-2 | Endonuclease III-like, iron-sulphur cluster loop motif | Helix-hairpin-helix DNA-binding motif, class 1 | Helix-hairpin-helix motif | Helix-turn-helix, base-excision DNA repair, C-terminal | HhH-GPD domain	NO
AT1G05940	-0.71611	5.25548	1.22298e-12	5.82617e-11	DOWN	cationic amino acid transporter 9	cationic amino acid transporter 9 (CAT9); FUNCTIONS IN: cationic amino acid transmembrane transporter activity; INVOLVED IN: amino acid transport, transport, transmembrane transport; LOCATED IN: plasma membrane; EXPRESSED IN: 25 plant structures; EXPRESSED DURING: 15 growth stages; CONTAINS InterPro DOMAIN/s: Cationic amino acid transporter (InterPro:IPR015606), Amino acid/polyamine transporter I…	Amino acid/polyamine transporter I | Cationic amino acid transporter, C-terminal	NO
AT1G06000	-0.558203	3.01916	0.000370088	0.0030262	DOWN	UDP-Glycosyltransferase superfamily protein	UDP-Glycosyltransferase superfamily protein; CONTAINS InterPro DOMAIN/s: UDP-glucuronosyl/UDP-glucosyltransferase (InterPro:IPR002213); BEST Arabidopsis thaliana protein match is: UDP-glucosyl transferase 89B1 (TAIR:AT1G73880.1)	UDP-glucuronosyl/UDP-glucosyltransferase	NO
AT1G06040	-0.531634	8.54165	4.85944e-07	8.62334e-06	DOWN	B-box zinc finger family protein	SALT TOLERANCE (STO); CONTAINS InterPro DOMAIN/s: Zinc finger, B-box (InterPro:IPR000315); BEST Arabidopsis thaliana protein match is: salt tolerance homologue (TAIR:AT2G31380.1)	Zinc finger, B-box	NO
AT1G06070	0.288889	4.46469	0.00695196	0.0352157	UP	Basic-leucine zipper (bZIP) transcription factor family protein	Basic-leucine zipper (bZIP) transcription factor family protein; FUNCTIONS IN: DNA binding, sequence-specific DNA binding transcription factor activity; INVOLVED IN: regulation of transcription, DNA-dependent; LOCATED IN: chloroplast; EXPRESSED IN: 23 plant structures; EXPRESSED DURING: 13 growth stages; CONTAINS InterPro DOMAIN/s: Basic-leucine zipper (bZIP) transcription factor (InterPro:IPR004…	Basic-leucine zipper domain	NO
AT1G06090	1.14262	0.793668	0.000180887	0.00163731	UP	Fatty acid desaturase family protein	Fatty acid desaturase family protein; FUNCTIONS IN: oxidoreductase activity, oxidoreductase activity, acting on paired donors, with oxidation of a pair of donors resulting in the reduction of molecular oxygen to two molecules of water; INVOLVED IN: oxidation reduction, lipid metabolic process; LOCATED IN: cellular_component unknown; CONTAINS InterPro DOMAIN/s: Fatty acid desaturase, type 1, core …	Fatty acid desaturase, type 1 | Fatty acid desaturase, type 1, core	NO
AT1G06200	0.259851	5.82134	0.00617735	0.0319993	UP	Peptidase S24/S26A/S26B/S26C family protein	Peptidase S24/S26A/S26B/S26C family protein; CONTAINS InterPro DOMAIN/s: Peptidase S24/S26A/S26B/S26C, beta-ribbon domain (InterPro:IPR011056), Peptidase S24/S26A/S26B/S26C (InterPro:IPR015927); BEST Arabidopsis thaliana protein match is: Peptidase S24/S26A/S26B/S26C family protein (TAIR:AT2G31140.1)		NO
AT1G06320	5.51396	-3.17434	7.86874e-05	0.000804819	UP		unknown protein		NO
AT1G06360	1.24505	5.63056	2.93325e-21	4.55276e-19	UP	Fatty acid desaturase family protein	Fatty acid desaturase family protein; FUNCTIONS IN: oxidoreductase activity, oxidoreductase activity, acting on paired donors, with oxidation of a pair of donors resulting in the reduction of molecular oxygen to two molecules of water; INVOLVED IN: oxidation reduction, lipid metabolic process; CONTAINS InterPro DOMAIN/s: Fatty acid desaturase, type 1, core (InterPro:IPR015876), Fatty acid desatur…	Fatty acid desaturase, type 1 | Fatty acid desaturase, type 1, core	NO
AT1G06400	0.59266	5.96798	1.59797e-09	4.68012e-08	UP	Ras-related small GTP-binding family protein	ARA-2; FUNCTIONS IN: GTP binding; INVOLVED IN: protein transport, small GTPase mediated signal transduction; LOCATED IN: plasma membrane; EXPRESSED IN: 22 plant structures; EXPRESSED DURING: 13 growth stages; CONTAINS InterPro DOMAIN/s: Ras GTPase (InterPro:IPR001806), Small GTP-binding protein (InterPro:IPR005225), Small GTPase (InterPro:IPR020851), Ras (InterPro:IPR013753), Ras small GTPase, Ra…	P-loop containing nucleoside triphosphate hydrolase | Small GTP-binding protein domain | Small GTPase superfamily | Small GTPase superfamily, Rab type	NO
AT1G06410	0.311825	7.19168	0.00684394	0.0347679	UP	trehalose-phosphatase/synthase 7	trehalose-phosphatase/synthase 7 (TPS7); FUNCTIONS IN: transferase activity, transferring glycosyl groups, trehalose-phosphatase activity; INVOLVED IN: trehalose biosynthetic process, metabolic process; EXPRESSED IN: 27 plant structures; EXPRESSED DURING: 15 growth stages; CONTAINS InterPro DOMAIN/s: HAD-superfamily hydrolase, subfamily IIB (InterPro:IPR006379), Glycosyl transferase, family 20 (I…	Glycosyl transferase, family 20 | HAD-like domain | HAD-superfamily hydrolase, subfamily IIB | Trehalose-phosphatase	NO
AT1G06440	0.661152	1.12227	0.00186741	0.0119105	UP	Ubiquitin carboxyl-terminal hydrolase family protein	Ubiquitin carboxyl-terminal hydrolase family protein; LOCATED IN: mitochondrion; EXPRESSED IN: shoot apex, root; CONTAINS InterPro DOMAIN/s: RNA recognition domain, plant (InterPro:IPR021099); BEST Arabidopsis thaliana protein match is: Ubiquitin carboxyl-terminal hydrolase family protein (TAIR:AT4G33495.1)	Plant organelle RNA recognition domain	NO
AT1G06450	0.625761	2.25779	0.00068764	0.00513307	UP	Polynucleotidyl transferase, ribonuclease H-like superfamily protein	Polynucleotidyl transferase, ribonuclease H-like superfamily protein; FUNCTIONS IN: ribonuclease activity, nucleic acid binding; INVOLVED IN: RNA modification; LOCATED IN: nucleus; EXPRESSED IN: 24 plant structures; EXPRESSED DURING: 14 growth stages; CONTAINS InterPro DOMAIN/s: Ribonuclease CAF1 (InterPro:IPR006941), Polynucleotidyl transferase, ribonuclease H fold (InterPro:IPR012337); BEST Ara…	Ribonuclease CAF1 | Ribonuclease H-like domain	NO
AT1G06475	1.7159	-0.357303	0.000284764	0.00242506	UP		unknown protein		NO
AT1G06510	-0.310239	4.77867	0.00766093	0.0381698	DOWN		unknown protein; FUNCTIONS IN: molecular_function unknown; INVOLVED IN: biological_process unknown; LOCATED IN: chloroplast; EXPRESSED IN: 21 plant structures; EXPRESSED DURING: 13 growth stages		NO
AT1G06515	0.34105	4.02642	0.00690078	0.0349985	UP	Protein of unknown function (DUF3317)	Protein of unknown function (DUF3317); FUNCTIONS IN: molecular_function unknown; INVOLVED IN: biological_process unknown; LOCATED IN: mitochondrion; BEST Arabidopsis thaliana protein match is: Protein of unknown function (DUF3317) (TAIR:AT2G30942.1)	Small subunit of serine palmitoyltransferase-like	NO
AT1G06530	0.422319	5.66673	5.27238e-05	0.000570077	UP	Tropomyosin-related	Tropomyosin-related; LOCATED IN: mitochondrion, plasma membrane, plastid; EXPRESSED IN: 25 plant structures; EXPRESSED DURING: 14 growth stages; BEST Arabidopsis thaliana protein match is: Tropomyosin-related (TAIR:AT3G58840.2)		NO
AT1G06560	0.591461	3.51409	7.40801e-05	0.000763492	UP	NOL1/NOP2/sun family protein	NOL1/NOP2/sun family protein; FUNCTIONS IN: methyltransferase activity, RNA binding; INVOLVED IN: biological_process unknown; LOCATED IN: cellular_component unknown; EXPRESSED IN: 23 plant structures; EXPRESSED DURING: 13 growth stages; CONTAINS InterPro DOMAIN/s: Bacterial Fmu (Sun)/eukaryotic nucleolar NOL1/Nop2p (InterPro:IPR001678), Pseudouridine synthase/archaeosine transglycosylase-like (In…	Bacterial Fmu (Sun)/eukaryotic nucleolar NOL1/Nop2p | Bacterial Fmu (Sun)/eukaryotic nucleolar NOL1/Nop2p, conserved site | PUA domain | PUA-like domain | RNA (C5-cytosine) methyltransferase | S-adenosyl-L-methionine-dependent methyltransferase-like	NO
AT1G06570	0.647038	7.86884	6.53789e-08	1.39811e-06	UP	phytoene desaturation 1	phytoene desaturation 1 (PDS1); CONTAINS InterPro DOMAIN/s: 4-hydroxyphenylpyruvate dioxygenase (InterPro:IPR005956), Glyoxalase/bleomycin resistance protein/dioxygenase (InterPro:IPR004360)	4-hydroxyphenylpyruvate dioxygenase | Glyoxalase/Bleomycin resistance protein/Dihydroxybiphenyl dioxygenase | Glyoxalase/fosfomycin resistance/dioxygenase domain	NO
AT1G06590	0.403302	3.47032	0.00437848	0.0241876	UP		unknown protein	Apc5/TPR19 domain | Tetratricopeptide-like helical domain	NO
AT1G06630	0.53998	4.48624	1.54774e-06	2.47645e-05	UP	F-box/RNI-like superfamily protein	F-box/RNI-like superfamily protein; FUNCTIONS IN: molecular_function unknown; INVOLVED IN: biological_process unknown; LOCATED IN: cellular_component unknown; EXPRESSED IN: 24 plant structures; EXPRESSED DURING: 13 growth stages; CONTAINS InterPro DOMAIN/s: F-box domain, cyclin-like (InterPro:IPR001810), F-box domain, Skp2-like (InterPro:IPR022364); BEST Arabidopsis thaliana protein match is: F-b…	F-box domain	YES	1:2028552:G-A;protein_coding;missense;GGA>GAA;G>E
AT1G06670	0.268576	5.2674	0.00916325	0.0443303	UP	nuclear DEIH-boxhelicase	nuclear DEIH-boxhelicase (NIH); CONTAINS InterPro DOMAIN/s: Helicase-associated domain (InterPro:IPR007502), DNA/RNA helicase, DEAD/DEAH box type, N-terminal (InterPro:IPR011545), Ankyrin repeat-containing domain (InterPro:IPR020683), DEAD-like helicase, N-terminal (InterPro:IPR014001), DNA/RNA helicase, C-terminal (InterPro:IPR001650), Single-stranded nucleic acid binding R3H (InterPro:IPR001374…		NO
AT1G06680	-0.462086	11.8774	3.69675e-06	5.42852e-05	DOWN	photosystem II subunit P-1	photosystem II subunit P-1 (PSBP-1); FUNCTIONS IN: poly(U) RNA binding; INVOLVED IN: photosynthesis, light reaction, defense response to bacterium, response to light intensity; LOCATED IN: in 12 components; LOCATED IN: in 9 components; EXPRESSED IN: 24 plant structures; EXPRESSED IN: 27 plant structures; EXPRESSED DURING: 15 growth stages; CONTAINS InterPro DOMAIN/s: Photosystem II oxygen evolvin…	Mog1/PsbP, alpha/beta/alpha sandwich | Photosystem II PsbP, oxygen evolving complex	NO
AT1G06720	0.479717	4.18465	0.000287787	0.00244772	UP	P-loop containing nucleoside triphosphate hydrolases superfamily protein	P-loop containing nucleoside triphosphate hydrolases superfamily protein; FUNCTIONS IN: GTP binding, GTPase activity; INVOLVED IN: ribosome biogenesis; LOCATED IN: nucleus; EXPRESSED IN: 21 plant structures; EXPRESSED DURING: 13 growth stages; CONTAINS InterPro DOMAIN/s: AARP2CN (InterPro:IPR012948), Protein synthesis factor, GTP-binding (InterPro:IPR000795), Protein of unknown function DUF663 (I…	AARP2CN | Elongation factor, GTP-binding domain | P-loop containing nucleoside triphosphate hydrolase | Ribosome biogenesis protein BMS1/TSR1, C-terminal	NO
AT1G06730	0.422716	3.78704	0.00117305	0.00804508	UP	pfkB-like carbohydrate kinase family protein	pfkB-like carbohydrate kinase family protein; FUNCTIONS IN: kinase activity; INVOLVED IN: D-ribose catabolic process; LOCATED IN: nucleus, cytoplasm; EXPRESSED IN: 22 plant structures; EXPRESSED DURING: 13 growth stages; CONTAINS InterPro DOMAIN/s: Carbohydrate/purine kinase (InterPro:IPR011611); BEST Arabidopsis thaliana protein match is: pfkB-like carbohydrate kinase family protein (TAIR:AT3G59…	Carbohydrate kinase PfkB | Ribokinase-like	NO
AT1G06740	0.506268	2.38361	0.00957468	0.0459707	UP	transposable element gene	Mutator-like transposase family, has a 2.7e-53 P-value blast match to GB:AAA21566 mudrA of transposon="MuDR" (MuDr-element) (Zea mays)	MULE transposase domain | Transposase, MuDR, plant | Zinc finger, CCHC-type | Zinc finger, PMZ-type | Zinc finger, SWIM-type	NO
AT1G06760	-0.336432	7.36976	0.00188568	0.0120037	DOWN	winged-helix DNA-binding transcription factor family protein	winged-helix DNA-binding transcription factor family protein; FUNCTIONS IN: DNA binding; INVOLVED IN: nucleosome assembly; LOCATED IN: nucleus, nucleosome; EXPRESSED IN: 23 plant structures; EXPRESSED DURING: 13 growth stages; CONTAINS InterPro DOMAIN/s: Winged helix-turn-helix transcription repressor DNA-binding (InterPro:IPR011991), Histone H5 (InterPro:IPR005819), Histone H1/H5 (InterPro:IPR00…	Histone H5 | Linker histone H1/H5, domain H15 | Winged helix-turn-helix DNA-binding domain	NO
AT1G06770	0.357114	3.51057	0.00721815	0.0363509	UP	DREB2A-interacting protein 1	DREB2A-interacting protein 1 (DRIP1); BEST Arabidopsis thaliana protein match is: DREB2A-interacting protein 2 (TAIR:AT2G30580.1); CONTAINS InterPro DOMAIN/s: Zinc finger, RING-type, conserved site (InterPro:IPR017907), Zinc finger, RING-type (InterPro:IPR001841), Zinc finger, C3HC4 RING-type (InterPro:IPR018957)	Zinc finger, C3HC4 RING-type | Zinc finger, RING-type | Zinc finger, RING-type, conserved site | Zinc finger, RING/FYVE/PHD-type	NO
AT1G06820	-0.2619	5.49083	0.00484885	0.0263028	DOWN	carotenoid isomerase	carotenoid isomerase (CRTISO); CONTAINS InterPro DOMAIN/s: Fumarate reductase/succinate dehydrogenase flavoprotein, N-terminal (InterPro:IPR003953), Carotene isomerase (InterPro:IPR014101); BEST Arabidopsis thaliana protein match is: FAD/NAD(P)-binding oxidoreductase family protein (TAIR:AT1G57770.1)	Carotene isomerase	NO
AT1G06870	0.437087	3.84808	0.00118967	0.00814415	UP	Peptidase S24/S26A/S26B/S26C family protein	Peptidase S24/S26A/S26B/S26C family protein; FUNCTIONS IN: serine-type peptidase activity, peptidase activity; INVOLVED IN: proteolysis; LOCATED IN: integral to membrane, membrane; EXPRESSED IN: male gametophyte, pollen tube; EXPRESSED DURING: L mature pollen stage; CONTAINS InterPro DOMAIN/s: Peptidase S24/S26A/S26B/S26C, beta-ribbon domain (InterPro:IPR011056), Peptidase S24/S26A/S26B/S26C (Int…	Peptidase S24/S26, beta-ribbon domain | Peptidase S24/S26A/S26B/S26C | Peptidase S26 | Peptidase S26A, signal peptidase I | Peptidase S26A, signal peptidase I, conserved site | Peptidase S26A, signal peptidase I, serine active site	NO
AT1G06890	0.298321	5.41258	0.00459083	0.0251663	UP	nodulin MtN21 /EamA-like transporter family protein	nodulin MtN21 /EamA-like transporter family protein; CONTAINS InterPro DOMAIN/s: Protein of unknown function DUF250 (InterPro:IPR004853); BEST Arabidopsis thaliana protein match is: Nucleotide/sugar transporter family protein (TAIR:AT2G30460.2)	Triose-phosphate transporter domain	NO
AT1G06900	0.330826	5.67899	0.00198138	0.0125159	UP	Insulinase (Peptidase family M16) family protein	Insulinase (Peptidase family M16) family protein; FUNCTIONS IN: metalloendopeptidase activity, catalytic activity, zinc ion binding, metal ion binding; INVOLVED IN: proteolysis; LOCATED IN: cellular_component unknown; EXPRESSED IN: 23 plant structures; EXPRESSED DURING: 13 growth stages; CONTAINS InterPro DOMAIN/s: Peptidase M16, zinc-binding site (InterPro:IPR001431), Peptidase M16, C-terminal (…	Metalloenzyme, LuxS/M16 peptidase-like | Peptidase M16 domain | Peptidase M16, C-terminal domain | Peptidase M16, N-terminal | Peptidase M16, zinc-binding site	NO
AT1G06910	-0.479807	2.57734	0.00629406	0.032464	DOWN	TRF-like 7	TRF-like 7 (TRFL7); FUNCTIONS IN: DNA binding, sequence-specific DNA binding transcription factor activity; INVOLVED IN: response to jasmonic acid stimulus, response to salicylic acid stimulus; EXPRESSED IN: cultured cell; CONTAINS InterPro DOMAIN/s: SANT, DNA-binding (InterPro:IPR001005), Homeodomain-like (InterPro:IPR009057), Myb, DNA-binding (InterPro:IPR014778), HTH transcriptional regulator,…	Homeodomain-like | Myb domain | SANT/Myb domain	NO
AT1G06930	2.15264	-2.48592	0.00156058	0.010251	UP		unknown protein		NO
AT1G07010	-1.07638	6.68352	9.33661e-25	2.09644e-22	DOWN	Calcineurin-like metallo-phosphoesterase superfamily protein	Calcineurin-like metallo-phosphoesterase superfamily protein; BEST Arabidopsis thaliana protein match is: Calcineurin-like metallo-phosphoesterase superfamily protein (TAIR:AT1G18480.1); FUNCTIONS IN: hydrolase activity, protein serine/threonine phosphatase activity; INVOLVED IN: biological_process unknown; EXPRESSED IN: 21 plant structures; LOCATED IN: peroxisome; EXPRESSED DURING: 13 growth sta…	Calcineurin-like phosphoesterase domain, apaH type | Metallo-dependent phosphatase-like	NO
AT1G07020	0.579996	3.2915	2.35192e-05	0.000281004	UP		unknown protein		NO
AT1G07040	0.572176	5.86098	2.91083e-07	5.42255e-06	UP		unknown protein; INVOLVED IN: biological_process unknown; LOCATED IN: chloroplast; EXPRESSED IN: 24 plant structures; EXPRESSED DURING: 14 growth stages; BEST Arabidopsis thaliana protein match is: unknown protein (TAIR:AT1G27030.1)	Domain of unknown function DUF1338	NO
AT1G07110	-0.300149	7.03434	0.00146268	0.00969583	DOWN	fructose-2,6-bisphosphatase	fructose-2,6-bisphosphatase (F2KP); FUNCTIONS IN: fructose-2,6-bisphosphate 2-phosphatase activity; INVOLVED IN: N-terminal protein myristoylation, fructose metabolic process; LOCATED IN: cytosol, plasma membrane; EXPRESSED IN: 24 plant structures; EXPRESSED DURING: 14 growth stages; CONTAINS InterPro DOMAIN/s: Bifunctional 6-phosphofructo-2-kinase/fructose-2, 6-bisphosphate 2-phosphatase (InterP…	6-phosphofructo-2-kinase | Bifunctional 6-phosphofructo-2-kinase/fructose-2, 6-bisphosphate 2-phosphatase | Carbohydrate binding module family 20 | Carbohydrate-binding-like fold | Fructose-2,6-bisphosphatase | Histidine phosphatase superfamily | Histidine phosphatase superfamily, clade-1 | Immunoglobulin-like fold | P-loop containing nucleoside triphosphate hydrolase | Phosphoglycerate/bisphosph…	NO
AT1G07140	0.32025	6.61359	0.000585131	0.00447905	UP	Pleckstrin homology (PH) domain superfamily protein	SIRANBP; FUNCTIONS IN: Ran GTPase binding; INVOLVED IN: intracellular transport, protein import into nucleus, translocation; LOCATED IN: cellular_component unknown; EXPRESSED IN: 23 plant structures; EXPRESSED DURING: 16 growth stages; CONTAINS InterPro DOMAIN/s: Ran binding protein 1 (InterPro:IPR000156), Pleckstrin homology-type (InterPro:IPR011993); BEST Arabidopsis thaliana protein match is: …	Pleckstrin homology-like domain | Ran binding domain	NO
AT1G07170	0.477427	4.02147	0.000505233	0.00395095	UP	PHF5-like protein	PHF5-like protein; LOCATED IN: cellular_component unknown; EXPRESSED IN: 24 plant structures; EXPRESSED DURING: 15 growth stages; CONTAINS InterPro DOMAIN/s: PHF5-like (InterPro:IPR005345); BEST Arabidopsis thaliana protein match is: PHF5-like protein (TAIR:AT2G30000.1)	PHF5-like	NO
AT1G07180	-0.676887	6.75433	5.42345e-08	1.17395e-06	DOWN	alternative NAD(P)H dehydrogenase 1	alternative NAD(P)H dehydrogenase 1 (NDA1); FUNCTIONS IN: NADH dehydrogenase activity; INVOLVED IN: oxidation reduction; LOCATED IN: intrinsic to mitochondrial inner membrane, mitochondrion; EXPRESSED IN: 20 plant structures; EXPRESSED DURING: 10 growth stages; CONTAINS InterPro DOMAIN/s: FAD-dependent pyridine nucleotide-disulphide oxidoreductase (InterPro:IPR013027), Pyridine nucleotide-disulph…	FAD-dependent pyridine nucleotide-disulphide oxidoreductase | Pyridine nucleotide-disulphide oxidoreductase, FAD/NAD(P)-binding domain | Pyridine nucleotide-disulphide oxidoreductase, NAD-binding domain	NO
AT1G07230	0.288912	6.01794	0.00302143	0.0177848	UP	non-specific phospholipase C1	non-specific phospholipase C1 (NPC1); FUNCTIONS IN: hydrolase activity, acting on ester bonds; LOCATED IN: endomembrane system; EXPRESSED IN: 23 plant structures; EXPRESSED DURING: 13 growth stages; CONTAINS InterPro DOMAIN/s: Phosphoesterase (InterPro:IPR007312); BEST Arabidopsis thaliana protein match is: non-specific phospholipase C2 (TAIR:AT2G26870.1)	Phosphoesterase	NO
AT1G07260	0.961227	0.548704	0.000196814	0.0017602	UP	UDP-glucosyl transferase 71C3	UDP-glucosyl transferase 71C3 (UGT71C3); FUNCTIONS IN: quercetin 3-O-glucosyltransferase activity, UDP-glycosyltransferase activity, transferase activity, transferring glycosyl groups; INVOLVED IN: metabolic process; LOCATED IN: cellular_component unknown; EXPRESSED IN: 7 plant structures; EXPRESSED DURING: F mature embryo stage, petal differentiation and expansion stage, E expanded cotyledon sta…	UDP-glucuronosyl/UDP-glucosyltransferase	NO
AT1G07300	1.2683	1.84096	2.06436e-07	3.96441e-06	UP	josephin protein-related	josephin protein-related; BEST Arabidopsis thaliana protein match is: JOSEPHIN-like protein (TAIR:AT2G29640.1)		NO
AT1G07310	0.456482	5.5462	1.07239e-06	1.77489e-05	UP	Calcium-dependent lipid-binding (CaLB domain) family protein	Calcium-dependent lipid-binding (CaLB domain) family protein; CONTAINS InterPro DOMAIN/s: C2 membrane targeting protein (InterPro:IPR018029), C2 calcium/lipid-binding domain, CaLB (InterPro:IPR008973), C2 calcium-dependent membrane targeting (InterPro:IPR000008); BEST Arabidopsis thaliana protein match is: Calcium-dependent lipid-binding (CaLB domain) family protein (TAIR:AT5G23950.1)	C2 domain	NO
AT1G07390	-0.690055	3.28856	1.14411e-06	1.88895e-05	DOWN	receptor like protein 1	receptor like protein 1 (RLP1); CONTAINS InterPro DOMAIN/s: Leucine-rich repeat, typical subtype (InterPro:IPR003591), Leucine-rich repeat (InterPro:IPR001611); CONTAINS InterPro DOMAIN/s: Leucine-rich repeat, typical subtype (InterPro:IPR003591), Leucine-rich repeat-containing N-terminal domain, type 2 (InterPro:IPR013210), Leucine-rich repeat (InterPro:IPR001611); BEST Arabidopsis thaliana prot…	Leucine rich repeat 4 | Leucine-rich repeat	NO
AT1G07400	1.45108	2.04363	0.000777096	0.00569481	UP	HSP20-like chaperones superfamily protein	HSP20-like chaperones superfamily protein; CONTAINS InterPro DOMAIN/s: Heat shock protein Hsp20 (InterPro:IPR002068), HSP20-like chaperone (InterPro:IPR008978); BEST Arabidopsis thaliana protein match is: HSP20-like chaperones superfamily protein (TAIR:AT1G59860.1)	Alpha crystallin/Hsp20 domain | HSP20-like chaperone	NO
AT1G07430	-1.30714	3.97508	0.000115684	0.00112319	DOWN	highly ABA-induced PP2C gene 2	highly ABA-induced PP2C gene 2 (HAI2); FUNCTIONS IN: protein serine/threonine phosphatase activity, catalytic activity; INVOLVED IN: protein amino acid dephosphorylation; LOCATED IN: protein serine/threonine phosphatase complex; EXPRESSED IN: 17 plant structures; EXPRESSED DURING: 9 growth stages; CONTAINS InterPro DOMAIN/s: Protein phosphatase 2C, manganese/magnesium aspartate binding site (Inte…	Protein phosphatase 2C | Protein phosphatase 2C (PP2C)-like domain | Protein phosphatase 2C, manganese/magnesium aspartate binding site	NO
AT1G07450	-0.884822	1.53235	0.0013698	0.0091523	DOWN	NAD(P)-binding Rossmann-fold superfamily protein	NAD(P)-binding Rossmann-fold superfamily protein; FUNCTIONS IN: oxidoreductase activity, binding, catalytic activity; INVOLVED IN: oxidation reduction, metabolic process; EXPRESSED IN: 20 plant structures; EXPRESSED DURING: 10 growth stages; CONTAINS InterPro DOMAIN/s: Short-chain dehydrogenase/reductase, conserved site (InterPro:IPR020904), NAD(P)-binding domain (InterPro:IPR016040), Glucose/rib…	Glucose/ribitol dehydrogenase | NAD(P)-binding domain | Short-chain dehydrogenase/reductase SDR | Short-chain dehydrogenase/reductase, conserved site	NO
AT1G07485	-1.15047	-1.07046	0.00894381	0.0434059	DOWN		unknown protein; FUNCTIONS IN: molecular_function unknown; INVOLVED IN: biological_process unknown; LOCATED IN: cellular_component unknown; EXPRESSED IN: shoot apex, embryo, leaf whorl, pedicel; EXPRESSED DURING: 4 anthesis, D bilateral stage		NO
AT1G07490	-0.820531	0.839371	0.00399824	0.0224366	DOWN	ROTUNDIFOLIA like 3	ROTUNDIFOLIA like 3 (RTFL3); FUNCTIONS IN: molecular_function unknown; INVOLVED IN: shoot development; LOCATED IN: chloroplast; CONTAINS InterPro DOMAIN/s: DVL (InterPro:IPR012552); BEST Arabidopsis thaliana protein match is: ROTUNDIFOLIA like 5 (TAIR:AT5G59510.1)	DVL	NO
AT1G07520	0.67716	3.77318	1.1801e-05	0.000152756	UP	GRAS family transcription factor	GRAS family transcription factor; CONTAINS InterPro DOMAIN/s: Transcription factor GRAS (InterPro:IPR005202); BEST Arabidopsis thaliana protein match is: GRAS family transcription factor (TAIR:AT2G29065.1)	Transcription factor GRAS	NO
AT1G07530	0.397028	5.93193	7.0191e-05	0.000728762	UP	SCARECROW-like 14	SCARECROW-like 14 (SCL14); CONTAINS InterPro DOMAIN/s: Transcription factor GRAS (InterPro:IPR005202); BEST Arabidopsis thaliana protein match is: GRAS family transcription factor (TAIR:AT2G29060.1)	Transcription factor GRAS	NO
AT1G07550	-2.2016	-1.43638	1.58321e-05	0.000197477	DOWN	Leucine-rich repeat protein kinase family protein	Leucine-rich repeat protein kinase family protein; FUNCTIONS IN: kinase activity; INVOLVED IN: protein amino acid phosphorylation; LOCATED IN: endomembrane system; EXPRESSED IN: root, leaf; EXPRESSED DURING: LP.08 eight leaves visible; CONTAINS InterPro DOMAIN/s: Protein kinase, ATP binding site (InterPro:IPR017441), Protein kinase, catalytic domain (InterPro:IPR000719), Leucine-rich repeat (Inte…	Concanavalin A-like lectin/glucanase, subgroup | Leucine-rich repeat | Malectin-like carbohydrate-binding domain | Protein kinase domain | Protein kinase, ATP binding site | Protein kinase-like domain | Serine/threonine-protein kinase, active site	NO
AT1G07570	-0.551922	5.28214	1.62535e-06	2.58468e-05	DOWN	Protein kinase superfamily protein	APK1A; FUNCTIONS IN: protein serine/threonine kinase activity, kinase activity; INVOLVED IN: protein amino acid phosphorylation; INVOLVED IN: protein amino acid phosphorylation, N-terminal protein myristoylation; EXPRESSED IN: 20 plant structures; LOCATED IN: plasma membrane; EXPRESSED DURING: 8 growth stages; CONTAINS InterPro DOMAIN/s: Protein kinase, ATP binding site (InterPro:IPR017441), Seri…	Concanavalin A-like lectin/glucanase, subgroup | Protein kinase domain | Protein kinase, ATP binding site | Protein kinase-like domain | Serine-threonine/tyrosine-protein kinase catalytic domain | Serine/threonine-protein kinase, active site	NO
AT1G07600	-0.734161	2.34544	7.03512e-05	0.000730199	DOWN	metallothionein 1A	metallothionein 1A (MT1A); BEST Arabidopsis thaliana protein match is: metallothionein 1C (TAIR:AT1G07610.1)		NO
AT1G07640	-0.566132	4.67004	5.67676e-05	0.000606981	DOWN	Dof-type zinc finger DNA-binding family protein	OBP2; CONTAINS InterPro DOMAIN/s: Zinc finger, Dof-type (InterPro:IPR003851); BEST Arabidopsis thaliana protein match is: Dof-type zinc finger DNA-binding family protein (TAIR:AT2G28810.1); BEST Arabidopsis thaliana protein match is: Dof-type zinc finger DNA-binding family protein (TAIR:AT2G28810.2)	Zinc finger, Dof-type	NO
AT1G07650	-0.589388	5.16589	6.94157e-08	1.47694e-06	DOWN	Leucine-rich repeat transmembrane protein kinase	Leucine-rich repeat transmembrane protein kinase; FUNCTIONS IN: protein serine/threonine kinase activity, kinase activity, ATP binding; INVOLVED IN: protein amino acid phosphorylation, transmembrane receptor protein tyrosine kinase signaling pathway; INVOLVED IN: transmembrane receptor protein tyrosine kinase signaling pathway, protein amino acid phosphorylation; LOCATED IN: endomembrane system; …	Concanavalin A-like lectin/glucanase, subgroup | Leucine-rich repeat | Malectin | Protein kinase domain | Protein kinase, ATP binding site | Protein kinase-like domain | Serine-threonine/tyrosine-protein kinase catalytic domain | Serine/threonine-protein kinase, active site	NO
AT1G07670	0.435202	5.18419	0.000703432	0.00523009	UP	endomembrane-type CA-ATPase 4	endomembrane-type CA-ATPase 4 (ECA4); FUNCTIONS IN: calcium-transporting ATPase activity; INVOLVED IN: cation transport, calcium ion transport, metabolic process, ATP biosynthetic process; LOCATED IN: endoplasmic reticulum, plasma membrane; EXPRESSED IN: guard cell, callus, cultured cell; CONTAINS InterPro DOMAIN/s: ATPase, P-type, ATPase-associated domain (InterPro:IPR008250), ATPase, P-type, ca…	Cation-transporting P-type ATPase | Cation-transporting P-type ATPase, C-terminal | Cation-transporting P-type ATPase, N-terminal | HAD-like domain | P-type ATPase, transmembrane domain | P-type ATPase, A domain | P-type ATPase, cytoplasmic domain N | P-type ATPase, phosphorylation site	NO
AT1G07700	-0.545921	5.92654	8.25142e-09	2.1215e-07	DOWN	Thioredoxin superfamily protein	Thioredoxin superfamily protein; INVOLVED IN: cell redox homeostasis; LOCATED IN: chloroplast; LOCATED IN: chloroplast stroma, chloroplast; EXPRESSED IN: 24 plant structures; EXPRESSED DURING: 15 growth stages; CONTAINS InterPro DOMAIN/s: Thioredoxin fold (InterPro:IPR012335), Thioredoxin, core (InterPro:IPR015467), Thioredoxin domain (InterPro:IPR013766), Thioredoxin-like fold (InterPro:IPR01233…	Thioredoxin | Thioredoxin domain | Thioredoxin-like fold	NO
AT1G07720	-0.430782	5.71996	0.00620388	0.032112	DOWN	3-ketoacyl-CoA synthase 3	3-ketoacyl-CoA synthase 3 (KCS3); FUNCTIONS IN: transferase activity, transferring acyl groups other than amino-acyl groups, catalytic activity, acyltransferase activity; INVOLVED IN: response to cold, response to light stimulus, response to osmotic stress; LOCATED IN: endoplasmic reticulum; EXPRESSED IN: 24 plant structures; EXPRESSED DURING: 13 growth stages; CONTAINS InterPro DOMAIN/s: Thiolas…		NO
AT1G07780	-0.779961	3.58007	2.41802e-05	0.000288084	DOWN	phosphoribosylanthranilate isomerase 1	phosphoribosylanthranilate isomerase 1 (PAI1); CONTAINS InterPro DOMAIN/s: N-(5&apos;phosphoribosyl)anthranilate isomerase (PRAI) (InterPro:IPR001240), Aldolase-type TIM barrel (InterPro:IPR013785), Ribulose-phosphate binding barrel (InterPro:IPR011060); BEST Arabidopsis thaliana protein match is: phosphoribosylanthranilate isomerase 2 (TAIR:AT5G05590.1)	Aldolase-type TIM barrel | N-(5'phosphoribosyl) anthranilate isomerase (PRAI) like domain | Ribulose-phosphate binding barrel	NO
AT1G07810	0.328204	5.88637	0.000431315	0.00345719	UP	ER-type Ca2+-ATPase 1	ER-type Ca2+-ATPase 1 (ECA1); FUNCTIONS IN: calcium-transporting ATPase activity; INVOLVED IN: manganese ion transport, response to cadmium ion, cellular manganese ion homeostasis, calcium ion transport, response to manganese ion; LOCATED IN: endoplasmic reticulum, plasma membrane, endoplasmic reticulum membrane; EXPRESSED IN: guard cell, callus, cultured cell; CONTAINS InterPro DOMAIN/s: ATPase,…	Cation-transporting P-type ATPase | Cation-transporting P-type ATPase, C-terminal | Cation-transporting P-type ATPase, N-terminal | HAD-like domain | P-type ATPase, transmembrane domain | P-type ATPase, A domain | P-type ATPase, cytoplasmic domain N | P-type ATPase, phosphorylation site	NO
AT1G07820	0.470309	6.13024	0.000104613	0.00102965	UP	Histone superfamily protein	Histone superfamily protein; FUNCTIONS IN: DNA binding; INVOLVED IN: nucleosome assembly; LOCATED IN: nucleus, nucleosome; CONTAINS InterPro DOMAIN/s: Histone H4, conserved site (InterPro:IPR019809), Histone-fold (InterPro:IPR009072), Histone core (InterPro:IPR007125), Histone H4 (InterPro:IPR001951); CONTAINS InterPro DOMAIN/s: Histone-fold (InterPro:IPR009072), Histone H4, conserved site (Inter…	Histone H4 | Histone H4, conserved site | Histone core | Histone-fold	NO
AT1G07870	0.57597	3.54263	1.08161e-05	0.00014142	UP	Protein kinase superfamily protein	Protein kinase superfamily protein; FUNCTIONS IN: protein serine/threonine kinase activity, protein kinase activity, kinase activity, ATP binding; INVOLVED IN: response to salt stress; INVOLVED IN: response to salt stress, N-terminal protein myristoylation; EXPRESSED IN: 23 plant structures; LOCATED IN: plasma membrane; EXPRESSED DURING: 13 growth stages; EXPRESSED IN: 24 plant structures; CONTAI…	Concanavalin A-like lectin/glucanase, subgroup | Protein kinase domain | Protein kinase, ATP binding site | Protein kinase-like domain | Serine/threonine-protein kinase, active site	NO
AT1G07890	-0.494677	8.68729	9.17718e-05	0.000921301	DOWN	ascorbate peroxidase 1	ascorbate peroxidase 1 (APX1); FUNCTIONS IN: L-ascorbate peroxidase activity; INVOLVED IN: in 6 processes; INVOLVED IN: response to reactive oxygen species, response to salt stress, response to heat, hydrogen peroxide catabolic process, embryo development ending in seed dormancy; LOCATED IN: cytosol, cell wall, chloroplast, plasma membrane; LOCATED IN: cytosol, cell wall, chloroplast, plasma memb…	Haem peroxidase | Haem peroxidase, plant/fungal/bacterial | Peroxidase, active site | Peroxidases heam-ligand binding site | Plant ascorbate peroxidase	NO
AT1G07902	-1.17978	-0.939719	0.00085613	0.00617855	DOWN				NO
AT1G07970	0.371486	4.10407	0.00190271	0.0120961	UP		CONTAINS InterPro DOMAIN/s: Cytochrome B561-related, N-terminal (InterPro:IPR019176)	Cytochrome B561-related	NO
AT1G07985	0.89635	3.9551	0.00186254	0.0118878	UP	Expressed protein	Expressed protein; FUNCTIONS IN: molecular_function unknown; INVOLVED IN: biological_process unknown; LOCATED IN: chloroplast		NO
AT1G08070	0.802713	1.1927	0.000197936	0.00176835	UP	Tetratricopeptide repeat (TPR)-like superfamily protein	ORGANELLE TRANSCRIPT PROCESSING 82 (OTP82); CONTAINS InterPro DOMAIN/s: Pentatricopeptide repeat (InterPro:IPR002885); BEST Arabidopsis thaliana protein match is: Tetratricopeptide repeat (TPR)-like superfamily protein (TAIR:AT2G29760.1)	Pentatricopeptide repeat | Tetratricopeptide-like helical domain	NO
AT1G08180	-0.512542	2.47375	0.003206	0.0186837	DOWN		unknown protein		NO
AT1G08210	0.455331	4.59506	8.18617e-05	0.000834204	UP	Eukaryotic aspartyl protease family protein	Eukaryotic aspartyl protease family protein; FUNCTIONS IN: aspartic-type endopeptidase activity; INVOLVED IN: proteolysis; LOCATED IN: anchored to membrane, plant-type cell wall; EXPRESSED IN: 22 plant structures; EXPRESSED DURING: 13 growth stages; CONTAINS InterPro DOMAIN/s: Peptidase aspartic (InterPro:IPR021109), Peptidase aspartic, catalytic (InterPro:IPR009007), Peptidase A1 (InterPro:IPR00…		NO
AT1G08230	-1.10156	4.5034	2.39232e-19	3.04059e-17	DOWN	Transmembrane amino acid transporter family protein	Transmembrane amino acid transporter family protein; EXPRESSED IN: 22 plant structures; EXPRESSED DURING: 10 growth stages; CONTAINS InterPro DOMAIN/s: Amino acid transporter, transmembrane (InterPro:IPR013057); BEST Arabidopsis thaliana protein match is: Transmembrane amino acid transporter family protein (TAIR:AT5G41800.1)	Amino acid transporter, transmembrane	NO
AT1G08250	-0.956458	3.62772	1.12702e-07	2.28807e-06	DOWN	arogenate dehydratase 6	arogenate dehydratase 6 (ADT6); FUNCTIONS IN: arogenate dehydratase activity, prephenate dehydratase activity; INVOLVED IN: L-phenylalanine biosynthetic process; LOCATED IN: chloroplast; EXPRESSED IN: 21 plant structures; EXPRESSED DURING: 13 growth stages; CONTAINS InterPro DOMAIN/s: Prephenate dehydratase (InterPro:IPR001086), Prephenate dehydratase, conserved site (InterPro:IPR018528); BEST Ar…	ACT domain | Prephenate dehydratase | Prephenate dehydratase, conserved site	NO
AT1G08270	-1.41304	-0.592348	4.55672e-06	6.53641e-05	DOWN		CONTAINS InterPro DOMAIN/s: MIT (InterPro:IPR007330); BEST Arabidopsis thaliana protein match is: AAA-type ATPase family protein (TAIR:AT2G27600.1)	MIT | P-loop containing nucleoside triphosphate hydrolase	NO
AT1G08315	0.654555	3.35044	7.25503e-05	0.000749791	UP	ARM repeat superfamily protein	ARM repeat superfamily protein; FUNCTIONS IN: binding; INVOLVED IN: biological_process unknown; LOCATED IN: cellular_component unknown; EXPRESSED IN: 22 plant structures; EXPRESSED DURING: 13 growth stages; CONTAINS InterPro DOMAIN/s: Armadillo-like helical (InterPro:IPR011989), Armadillo (InterPro:IPR000225), Armadillo-type fold (InterPro:IPR016024); BEST Arabidopsis thaliana protein match is: R…	Armadillo | Armadillo-like helical | Armadillo-type fold	NO
AT1G08320	0.544912	2.2985	0.00652357	0.0334125	UP	bZIP transcription factor family protein	bZIP transcription factor family protein; FUNCTIONS IN: DNA binding, sequence-specific DNA binding transcription factor activity; INVOLVED IN: regulation of transcription, DNA-dependent; EXPRESSED IN: 9 plant structures; LOCATED IN: chloroplast; EXPRESSED DURING: 6 growth stages; CONTAINS InterPro DOMAIN/s: Basic-leucine zipper (bZIP) transcription factor (InterPro:IPR004827), bZIP transcription …	Basic-leucine zipper domain | Transcription factor TGA like domain	NO
AT1G08340	0.777599	1.40131	0.000359964	0.00295923	UP	Rho GTPase activating protein with PAK-box/P21-Rho-binding domain	Rho GTPase activating protein with PAK-box/P21-Rho-binding domain; FUNCTIONS IN: Rac GTPase activator activity; INVOLVED IN: signal transduction; LOCATED IN: intracellular; EXPRESSED IN: 23 plant structures; EXPRESSED DURING: 13 growth stages; CONTAINS InterPro DOMAIN/s: PAK-box/P21-Rho-binding (InterPro:IPR000095), Rho GTPase activation protein (InterPro:IPR008936), RhoGAP (InterPro:IPR000198); …	CRIB domain | Rho GTPase activation protein | Rho GTPase-activating protein domain	NO
AT1G08380	-0.299273	11.0732	0.00134078	0.00901194	DOWN	photosystem I subunit O	photosystem I subunit O (PSAO); FUNCTIONS IN: molecular_function unknown; INVOLVED IN: response to salt stress, photosynthesis, light harvesting in photosystem I; LOCATED IN: thylakoid, photosystem I, chloroplast; EXPRESSED IN: 21 plant structures; EXPRESSED DURING: 13 growth stages; CONTAINS InterPro DOMAIN/s: Photosystem I PsaO (InterPro:IPR017498)	Photosystem I PsaO	NO
AT1G08410	0.488208	3.66889	0.000618065	0.00467799	UP	P-loop containing nucleoside triphosphate hydrolases superfamily protein	P-loop containing nucleoside triphosphate hydrolases superfamily protein; FUNCTIONS IN: GTP binding; INVOLVED IN: biological_process unknown; LOCATED IN: intracellular; EXPRESSED IN: 18 plant structures; EXPRESSED DURING: 13 growth stages; CONTAINS InterPro DOMAIN/s: GTP1/OBG (InterPro:IPR006073), GTP-binding protein, HSR1-related (InterPro:IPR002917); BEST Arabidopsis thaliana protein match is: …	GTP binding domain | P-loop containing nucleoside triphosphate hydrolase	NO
AT1G08420	0.314013	6.1006	0.00101881	0.0071608	UP	BRI1 suppressor 1 (BSU1)-like 2	BRI1 suppressor 1 (BSU1)-like 2 (BSL2); FUNCTIONS IN: hydrolase activity, manganese ion binding, protein serine/threonine phosphatase activity, iron ion binding, phosphoprotein phosphatase activity; FUNCTIONS IN: hydrolase activity, manganese ion binding, protein serine/threonine phosphatase activity, phosphoprotein phosphatase activity, iron ion binding; INVOLVED IN: biological_process unknown; …	Calcineurin-like phosphoesterase domain, apaH type | Kelch repeat type 2 | Kelch-type beta propeller | Metallo-dependent phosphatase-like | Serine/threonine protein phosphatase, BSU1 | Serine/threonine-specific protein phosphatase/bis(5-nucleosyl)-tetraphosphatase	YES	1:2655014:G-A;intronic_variant
AT1G08460	-0.410325	4.80399	0.000132683	0.00125707	DOWN	histone deacetylase 8	histone deacetylase 8 (HDA08); CONTAINS InterPro DOMAIN/s: Histone deacetylase superfamily (InterPro:IPR000286); BEST Arabidopsis thaliana protein match is: histone deacetylase 5 (TAIR:AT5G61060.1)	Histone deacetylase domain | Histone deacetylase superfamily	NO
AT1G08530	-0.514685	3.1306	0.0002478	0.00215162	DOWN		unknown protein; FUNCTIONS IN: molecular_function unknown; INVOLVED IN: biological_process unknown; LOCATED IN: chloroplast; BEST Arabidopsis thaliana protein match is: unknown protein (TAIR:AT5G09995.2)		NO
AT1G08540	-0.36843	6.71375	0.000352916	0.0029091	DOWN	RNApolymerase sigma subunit 2	RNApolymerase sigma subunit 2 (SIG2); CONTAINS InterPro DOMAIN/s: RNA polymerase sigma factor, region 2 (InterPro:IPR013325), Winged helix-turn-helix transcription repressor DNA-binding (InterPro:IPR011991), RNA polymerase sigma-70 region 3 (InterPro:IPR007624), RNA polymerase sigma-70 (InterPro:IPR014284), RNA polymerase sigma factor, region 3/4 (InterPro:IPR013324), RNA polymerase sigma-70 regi…	RNA polymerase sigma factor, SigB/SigC/SigD, plastid | RNA polymerase sigma factor, region 2 | RNA polymerase sigma factor, region 3/4 | RNA polymerase sigma-70 | RNA polymerase sigma-70 like domain | RNA polymerase sigma-70 region 1.2 | RNA polymerase sigma-70 region 2 | RNA polymerase sigma-70 region 3 | RNA polymerase sigma-70 region 4 | Winged helix-turn-helix DNA-binding domain	NO
AT1G08570	-1.31918	7.21744	2.74834e-19	3.47996e-17	DOWN	atypical CYS HIS rich thioredoxin 4	atypical CYS HIS rich thioredoxin 4 (ACHT4); FUNCTIONS IN: oxidoreductase activity, acting on sulfur group of donors, disulfide as acceptor; INVOLVED IN: cell redox homeostasis; LOCATED IN: chloroplast membrane, chloroplast, chloroplast stroma; EXPRESSED IN: 22 plant structures; EXPRESSED DURING: 13 growth stages; CONTAINS InterPro DOMAIN/s: Thioredoxin fold (InterPro:IPR012335), Thioredoxin, cor…	Thioredoxin | Thioredoxin domain | Thioredoxin-like fold	NO
AT1G08590	1.04997	1.37798	0.00036117	0.00296624	UP	Leucine-rich receptor-like protein kinase family protein	Leucine-rich receptor-like protein kinase family protein; FUNCTIONS IN: kinase activity; INVOLVED IN: protein amino acid phosphorylation; LOCATED IN: endomembrane system; EXPRESSED IN: hypocotyl, root, leaf; EXPRESSED DURING: LP.08 eight leaves visible; CONTAINS InterPro DOMAIN/s: Protein kinase, catalytic domain (InterPro:IPR000719), Leucine-rich repeat-containing N-terminal domain, type 2 (Inte…	Leucine rich repeat 4 | Leucine-rich repeat | Leucine-rich repeat-containing N-terminal, type 2 | Protein kinase domain | Protein kinase-like domain | Serine/threonine-protein kinase, active site	NO
AT1G08630	0.75805	3.87927	0.000310443	0.00260535	UP	threonine aldolase 1	threonine aldolase 1 (THA1); CONTAINS InterPro DOMAIN/s: Pyridoxal phosphate-dependent transferase, major domain (InterPro:IPR015424), Aromatic amino acid beta-eliminating lyase/threonine aldolase (InterPro:IPR001597), Pyridoxal phosphate-dependent transferase, major region, subdomain 1 (InterPro:IPR015421), Pyridoxal phosphate-dependent transferase, major region, subdomain 2 (InterPro:IPR015422)…	Aromatic amino acid beta-eliminating lyase/threonine aldolase | Pyridoxal phosphate-dependent transferase | Pyridoxal phosphate-dependent transferase, major region, subdomain 1 | Pyridoxal phosphate-dependent transferase, major region, subdomain 2 | Threonine aldolase	NO
AT1G08640	-0.514615	6.33501	1.66114e-06	2.63786e-05	DOWN	Chloroplast J-like domain 1	Chloroplast J-like domain 1 (CJD1); LOCATED IN: chloroplast, chloroplast envelope; EXPRESSED IN: 23 plant structures; EXPRESSED DURING: 14 growth stages		YES	1:2749759:G-A;exonic_variant,1:2749759:G-A;protein_coding;sense;CTG>TTG;L>L
AT1G08650	-0.881062	4.37475	1.52491e-05	0.000191572	DOWN	phosphoenolpyruvate carboxylase kinase 1	phosphoenolpyruvate carboxylase kinase 1 (PPCK1); FUNCTIONS IN: protein serine/threonine kinase activity, kinase activity; INVOLVED IN: protein amino acid phosphorylation; LOCATED IN: cellular_component unknown; EXPRESSED IN: 20 plant structures; EXPRESSED DURING: 13 growth stages; CONTAINS InterPro DOMAIN/s: Protein kinase, ATP binding site (InterPro:IPR017441), Protein kinase, catalytic domain …	Protein kinase domain | Protein kinase, ATP binding site | Protein kinase-like domain | Serine/threonine-protein kinase, active site | Serine/threonine/dual specificity protein kinase, catalytic domain	NO
AT1G08680	0.266501	5.71408	0.00537509	0.0285955	UP	ARF GAP-like zinc finger-containing protein ZIGA4	ARF GAP-like zinc finger-containing protein ZIGA4 (ZIGA4); FUNCTIONS IN: ARF GTPase activator activity, DNA binding, zinc ion binding; INVOLVED IN: regulation of ARF GTPase activity; LOCATED IN: nucleus; LOCATED IN: nucleus, plasma membrane; EXPRESSED IN: 22 plant structures; EXPRESSED IN: 23 plant structures; EXPRESSED DURING: 13 growth stages; CONTAINS InterPro DOMAIN/s: Arf GTPase activating p…	Arf GTPase activating protein	NO
AT1G08770	0.299603	3.99805	0.0096516	0.0462938	UP	prenylated RAB acceptor 1.E	prenylated RAB acceptor 1.E (PRA1.E); CONTAINS InterPro DOMAIN/s: Prenylated rab acceptor PRA1 (InterPro:IPR004895); BEST Arabidopsis thaliana protein match is: PRA1 (Prenylated rab acceptor) family protein (TAIR:AT1G55190.1)	Prenylated rab acceptor PRA1	NO
AT1G08800	-0.495579	4.65182	1.00818e-06	1.67686e-05	DOWN	Protein of unknown function, DUF593	Protein of unknown function, DUF593; INVOLVED IN: response to salt stress; INVOLVED IN: response to salt stress, N-terminal protein myristoylation; LOCATED IN: endomembrane system; EXPRESSED IN: 20 plant structures; EXPRESSED DURING: 12 growth stages; CONTAINS InterPro DOMAIN/s: Protein of unknown function DUF593 (InterPro:IPR007656); BEST Arabidopsis thaliana protein match is: Protein of unknown…	Zein-binding domain	YES	1:2812857:C-CT;exonic_variant
AT1G08810	-0.523437	3.35349	0.00444699	0.0245085	DOWN	myb domain protein 60	myb domain protein 60 (MYB60); CONTAINS InterPro DOMAIN/s: Homeodomain-like (InterPro:IPR009057), Myb, DNA-binding (InterPro:IPR014778), HTH transcriptional regulator, Myb-type, DNA-binding (InterPro:IPR017930), Homeodomain-related (InterPro:IPR012287), Myb transcription factor (InterPro:IPR015495); CONTAINS InterPro DOMAIN/s: SANT, DNA-binding (InterPro:IPR001005), Homeodomain-like (InterPro:IPR…	Homeodomain-like | Myb domain | SANT/Myb domain	NO
AT1G08820	0.36489	5.35137	0.000182334	0.00164732	UP	vamp/synaptobrevin-associated protein 27-2	vamp/synaptobrevin-associated protein 27-2 (VAP27-2); FUNCTIONS IN: structural molecule activity; INVOLVED IN: intracellular transport; LOCATED IN: plasma membrane, endoplasmic reticulum membrane; EXPRESSED IN: cultured cell; CONTAINS InterPro DOMAIN/s: PapD-like (InterPro:IPR008962), Major sperm protein (InterPro:IPR000535); BEST Arabidopsis thaliana protein match is: vesicle associated protein …	MSP domain | PapD-like	NO
AT1G08890	0.643817	4.84333	2.84462e-06	4.27149e-05	UP	Major facilitator superfamily protein	Major facilitator superfamily protein; FUNCTIONS IN: carbohydrate transmembrane transporter activity, sugar:hydrogen symporter activity; INVOLVED IN: transport, transmembrane transport; LOCATED IN: chloroplast, membrane; CONTAINS InterPro DOMAIN/s: Sugar transporter, conserved site (InterPro:IPR005829), Major facilitator superfamily (InterPro:IPR020846), General substrate transporter (InterPro:IP…	General substrate transporter | Major facilitator superfamily domain | Major facilitator superfamily domain, general substrate transporter | Sugar transporter, conserved site | Sugar/inositol transporter	NO
AT1G08910	0.340595	4.79444	0.0013835	0.00923643	UP	zinc ion binding;zinc ion binding	embryo defective 3001 (EMB3001); FUNCTIONS IN: zinc ion binding; INVOLVED IN: embryo development ending in seed dormancy; LOCATED IN: cellular_component unknown; CONTAINS InterPro DOMAIN/s: Zinc finger, MIZ-type (InterPro:IPR004181); BEST Arabidopsis thaliana protein match is: RING/U-box superfamily protein (TAIR:AT5G41580.1)	E3 SUMO protein ligase | Zinc finger, MIZ-type	YES	1:2859036:A-AC;exonic_variant,1:2859036:A-AC;exonic_variant&protein_coding
AT1G08920	1.23481	4.92023	1.3834e-16	1.15332e-14	UP	ERD (early response to dehydration) six-like 1	ERD (early response to dehydration) six-like 1 (ESL1); CONTAINS InterPro DOMAIN/s: Sugar transporter, conserved site (InterPro:IPR005829), Major facilitator superfamily (InterPro:IPR020846), General substrate transporter (InterPro:IPR005828), Sugar/inositol transporter (InterPro:IPR003663), Major facilitator superfamily, general substrate transporter (InterPro:IPR016196); BEST Arabidopsis thalian…	General substrate transporter | Major facilitator superfamily domain | Major facilitator superfamily domain, general substrate transporter | Sugar transporter, conserved site | Sugar/inositol transporter	NO
AT1G08930	2.5759	6.13093	2.62526e-11	1.01634e-09	UP	Major facilitator superfamily protein	EARLY RESPONSE TO DEHYDRATION 6 (ERD6); FUNCTIONS IN: carbohydrate transmembrane transporter activity, sugar:hydrogen symporter activity, sugar transmembrane transporter activity; INVOLVED IN: response to water deprivation, response to salt stress, response to cold, response to chitin, response to abscisic acid stimulus; LOCATED IN: integral to membrane, membrane; EXPRESSED IN: 30 plant structure…	General substrate transporter | Major facilitator superfamily domain | Major facilitator superfamily domain, general substrate transporter | Sugar transporter, conserved site | Sugar/inositol transporter	NO
AT1G08980	0.697761	6.34733	2.26081e-09	6.35083e-08	UP	amidase 1	amidase 1 (AMI1); FUNCTIONS IN: amidase activity, hydrolase activity, acting on carbon-nitrogen (but not peptide) bonds, indoleacetamide hydrolase activity; INVOLVED IN: indoleacetic acid biosynthetic process; LOCATED IN: cytoplasm; EXPRESSED IN: 25 plant structures; EXPRESSED DURING: 13 growth stages; CONTAINS InterPro DOMAIN/s: Amidase, conserved site (InterPro:IPR020556), Amidase (InterPro:IPR…	Amidase | Amidase signature domain | Amidase, conserved site	NO
AT1G08990	0.764883	1.98685	0.000360641	0.00296349	UP	plant glycogenin-like starch initiation protein 5	plant glycogenin-like starch initiation protein 5 (PGSIP5); FUNCTIONS IN: transferase activity, transferring glycosyl groups; INVOLVED IN: biosynthetic process; LOCATED IN: endomembrane system; EXPRESSED IN: root; CONTAINS InterPro DOMAIN/s: Glycosyl transferase, family 8 (InterPro:IPR002495); BEST Arabidopsis thaliana protein match is: plant glycogenin-like starch initiation protein 4 (TAIR:AT1G…	Glycosyl transferase, family 8 | Nucleotide-diphospho-sugar transferases	NO
AT1G09000	1.59945	2.31324	2.61186e-18	2.8016e-16	UP	NPK1-related protein kinase 1	NPK1-related protein kinase 1 (NP1); CONTAINS InterPro DOMAIN/s: Protein kinase, ATP binding site (InterPro:IPR017441), Serine/threonine-protein kinase domain (InterPro:IPR002290), Serine/threonine-protein kinase-like domain (InterPro:IPR017442), Serine/threonine-protein kinase, active site (InterPro:IPR008271), Protein kinase-like domain (InterPro:IPR011009), Mitogen activated protein kinase kin…	Protein kinase domain | Protein kinase, ATP binding site | Protein kinase-like domain | Serine/threonine-protein kinase, active site | Serine/threonine/dual specificity protein kinase, catalytic domain	NO
AT1G09080	2.37097	-0.805509	0.000260516	0.00224424	UP	Heat shock protein 70 (Hsp 70) family protein	BIP3; FUNCTIONS IN: ATP binding; INVOLVED IN: protein folding, response to heat, pollen tube growth; LOCATED IN: endoplasmic reticulum lumen; EXPRESSED IN: 10 plant structures; EXPRESSED DURING: 10 growth stages; CONTAINS InterPro DOMAIN/s: Heat shock protein 70, conserved site (InterPro:IPR018181), Heat shock protein Hsp70 (InterPro:IPR001023), Heat shock protein 70 (InterPro:IPR013126); BEST Ar…	Heat shock protein 70 family | Heat shock protein 70, conserved site | Heat shock protein 70kD, C-terminal domain | Heat shock protein 70kD, peptide-binding domain	NO
AT1G09090	1.3063	0.334995	1.91787e-06	2.97539e-05	UP	respiratory burst oxidase homolog B	respiratory burst oxidase homolog B (RBOHB); FUNCTIONS IN: NAD(P)H oxidase activity; INVOLVED IN: response to heat, seed germination, defense response; LOCATED IN: integral to membrane, membrane; EXPRESSED IN: embryo, root; EXPRESSED DURING: imbibition; CONTAINS InterPro DOMAIN/s: Ferredoxin reductase-type FAD-binding domain (InterPro:IPR017927), Cytochrome b245, heavy chain (InterPro:IPR000778),…	Cytochrome b245, heavy chain | EF-hand domain | EF-hand domain pair | FAD-binding 8 | Ferredoxin reductase-type FAD-binding domain | Ferric reductase transmembrane component-like domain | Ferric reductase, NAD binding | NADPH oxidase Respiratory burst | Respiratory burst oxidase homologue protein B | Riboflavin synthase-like beta-barrel	NO
AT1G09155	1.35323	-0.756995	0.000153129	0.00142159	UP	phloem protein 2-B15	phloem protein 2-B15 (PP2-B15); FUNCTIONS IN: carbohydrate binding; LOCATED IN: endomembrane system; EXPRESSED IN: 6 plant structures; EXPRESSED DURING: 4 anthesis, C globular stage, petal differentiation and expansion stage; BEST Arabidopsis thaliana protein match is: phloem protein 2-B13 (TAIR:AT1G56240.1)	F-box domain | Phloem protein 2-like	NO
AT1G09180	-0.656612	1.41842	0.00271859	0.0162724	DOWN	secretion-associated RAS super family 1	secretion-associated RAS super family 1 (SARA1A); FUNCTIONS IN: GTP binding; INVOLVED IN: intracellular protein transport; LOCATED IN: chloroplast; EXPRESSED IN: 15 plant structures; EXPRESSED DURING: 8 growth stages; CONTAINS InterPro DOMAIN/s: Small GTP-binding protein (InterPro:IPR005225), Small GTPase SAR1-type (InterPro:IPR006687), ARF/SAR superfamily (InterPro:IPR006689); BEST Arabidopsis t…	P-loop containing nucleoside triphosphate hydrolase | Small GTP-binding protein domain | Small GTPase superfamily, ARF/SAR type | Small GTPase superfamily, SAR1-type	NO
AT1G09190	0.844452	1.25349	5.87477e-05	0.00062419	UP	Tetratricopeptide repeat (TPR)-like superfamily protein	Tetratricopeptide repeat (TPR)-like superfamily protein; FUNCTIONS IN: molecular_function unknown; INVOLVED IN: biological_process unknown; LOCATED IN: mitochondrion; EXPRESSED IN: shoot apex, embryo, sperm cell, flower, seed; EXPRESSED DURING: petal differentiation and expansion stage, E expanded cotyledon stage, D bilateral stage; CONTAINS InterPro DOMAIN/s: Pentatricopeptide repeat (InterPro:I…	Pentatricopeptide repeat | Tetratricopeptide-like helical domain	NO
AT1G09290	0.492752	3.35839	0.000807617	0.00588774	UP		unknown protein		NO
AT1G09310	-0.522082	9.78105	0.000286942	0.00244115	DOWN	Protein of unknown function, DUF538	Protein of unknown function, DUF538; INVOLVED IN: biological_process unknown; LOCATED IN: apoplast; EXPRESSED IN: 22 plant structures; EXPRESSED DURING: 14 growth stages; CONTAINS InterPro DOMAIN/s: Protein of unknown function DUF538 (InterPro:IPR007493); BEST Arabidopsis thaliana protein match is: Protein of unknown function, DUF538 (TAIR:AT1G56580.1)	Protein of unknown function DUF538	NO
AT1G09320	0.790339	3.32797	1.34789e-08	3.32344e-07	UP	agenet domain-containing protein	agenet domain-containing protein; FUNCTIONS IN: RNA binding; INVOLVED IN: biological_process unknown; LOCATED IN: chloroplast; EXPRESSED IN: 24 plant structures; EXPRESSED DURING: 15 growth stages; CONTAINS InterPro DOMAIN/s: Tudor-like, plant (InterPro:IPR014002), Agenet (InterPro:IPR008395); BEST Arabidopsis thaliana protein match is: agenet domain-containing protein (TAIR:AT3G06520.1)	Agenet-like domain | Tudor-like, plant	NO
AT1G09340	-0.655335	9.41697	7.54328e-11	2.71728e-09	DOWN	chloroplast RNA binding	chloroplast RNA binding (CRB); FUNCTIONS IN: coenzyme binding, binding, catalytic activity; INVOLVED IN: in 6 processes; LOCATED IN: in 10 components; EXPRESSED IN: 24 plant structures; EXPRESSED DURING: 14 growth stages; CONTAINS InterPro DOMAIN/s: NAD-dependent epimerase/dehydratase (InterPro:IPR001509), NAD(P)-binding domain (InterPro:IPR016040); BEST Arabidopsis thaliana protein match is: chl…	NAD(P)-binding domain	NO
AT1G09430	0.458303	6.13276	2.52375e-06	3.83067e-05	UP	ATP-citrate lyase A-3	ATP-citrate lyase A-3 (ACLA-3); CONTAINS InterPro DOMAIN/s: ATP-grasp fold, subdomain 2 (InterPro:IPR013816), ATP-grasp fold, succinyl-CoA synthetase-type (InterPro:IPR013650), Succinyl-CoA synthetase-like (InterPro:IPR016102); BEST Arabidopsis thaliana protein match is: ATP-citrate lyase A-1 (TAIR:AT1G10670.4)	ATP-grasp fold, subdomain 2 | ATP-grasp fold, succinyl-CoA synthetase-type | Succinyl-CoA synthetase-like	NO
AT1G09460	0.793067	1.83012	0.000319996	0.00267638	UP	Carbohydrate-binding X8 domain superfamily protein	Carbohydrate-binding X8 domain superfamily protein; LOCATED IN: endomembrane system; EXPRESSED IN: 19 plant structures; EXPRESSED DURING: 12 growth stages; CONTAINS InterPro DOMAIN/s: X8 (InterPro:IPR012946); BEST Arabidopsis thaliana protein match is: Carbohydrate-binding X8 domain superfamily protein (TAIR:AT2G30933.1)	X8	NO
AT1G09480	-2.17831	1.02335	5.9216e-18	5.9536e-16	DOWN	NAD(P)-binding Rossmann-fold superfamily protein	NAD(P)-binding Rossmann-fold superfamily protein; FUNCTIONS IN: alcohol dehydrogenase (NAD) activity, cinnamyl-alcohol dehydrogenase activity; INVOLVED IN: lignin biosynthetic process, cellular metabolic process, metabolic process; LOCATED IN: cellular_component unknown; CONTAINS InterPro DOMAIN/s: NAD-dependent epimerase/dehydratase (InterPro:IPR001509), NAD(P)-binding domain (InterPro:IPR016040…	NAD(P)-binding domain | NAD-dependent epimerase/dehydratase, N-terminal domain	NO
AT1G09486	-0.987608	-0.0497585	0.00056142	0.00432803	DOWN		pseudogene, 60S ribosomal protein L21 (RPL21B), temporary automated functional assignment; blastp match of 67% identity and 2.0e-52 P-value to GP|3885884|gb|AAC78102.1||AF093630 60S ribosomal protein L21 {Oryza sativa}		NO
AT1G09510	2.48653	-2.46762	0.00025615	0.00221272	UP	NAD(P)-binding Rossmann-fold superfamily protein	NAD(P)-binding Rossmann-fold superfamily protein; FUNCTIONS IN: alcohol dehydrogenase (NAD) activity, cinnamyl-alcohol dehydrogenase activity; INVOLVED IN: lignin biosynthetic process, cellular metabolic process, metabolic process; LOCATED IN: cellular_component unknown; EXPRESSED IN: 8 plant structures; EXPRESSED DURING: LP.04 four leaves visible, 4 anthesis, C globular stage, F mature embryo st…	NAD(P)-binding domain | NAD-dependent epimerase/dehydratase, N-terminal domain	NO
AT1G09520	0.441906	4.40657	0.0011351	0.00783909	UP		LOCATED IN: chloroplast; EXPRESSED IN: 21 plant structures; EXPRESSED DURING: 12 growth stages; CONTAINS InterPro DOMAIN/s: Zinc finger, PHD-type, conserved site (InterPro:IPR019786); BEST Arabidopsis thaliana protein match is: PHD finger family protein (TAIR:AT3G17460.1)	Zinc finger, PHD-type, conserved site	NO
AT1G09570	0.527627	7.61201	6.40826e-07	1.11313e-05	UP	phytochrome A	phytochrome A (PHYA); CONTAINS InterPro DOMAIN/s: PAC motif (InterPro:IPR001610), Phytochrome, central region (InterPro:IPR013515), Signal transduction histidine kinase, core (InterPro:IPR005467), PAS fold (InterPro:IPR013767), PAS (InterPro:IPR000014), Phytochrome chromophore attachment domain (InterPro:IPR016132), ATPase-like, ATP-binding domain (InterPro:IPR003594), PAS fold-2 (InterPro:IPR013…	GAF domain | GAF domain-like | Histidine kinase-like ATPase, C-terminal domain | PAC motif | PAS domain | PAS fold | PAS fold-2 | Phytochrome | Phytochrome A/B/C/D/E | Phytochrome chromophore attachment domain | Phytochrome chromophore binding site | Phytochrome, central region | Signal transduction histidine kinase EnvZ-like, dimerisation/phosphoacceptor domain | Signal transduction histidine ki…	NO
AT1G09575	1.60081	2.95729	5.8891e-16	4.52855e-14	UP	Protein of unknown function (DUF607)	Protein of unknown function (DUF607); FUNCTIONS IN: molecular_function unknown; INVOLVED IN: biological_process unknown; LOCATED IN: mitochondrion; EXPRESSED IN: 17 plant structures; EXPRESSED DURING: 9 growth stages; CONTAINS InterPro DOMAIN/s: Protein of unknown function DUF607 (InterPro:IPR006769); BEST Arabidopsis thaliana protein match is: Protein of unknown function (DUF607) (TAIR:AT1G57610…	Coiled-coil domain containing protein 109, C-terminal	NO
AT1G09660	0.604157	4.54333	3.23354e-07	5.97087e-06	UP	RNA-binding KH domain-containing protein	RNA-binding KH domain-containing protein; FUNCTIONS IN: RNA binding, nucleic acid binding; INVOLVED IN: biological_process unknown; LOCATED IN: cellular_component unknown; EXPRESSED IN: 23 plant structures; EXPRESSED DURING: 13 growth stages; CONTAINS InterPro DOMAIN/s: K Homology (InterPro:IPR004087); BEST Arabidopsis thaliana protein match is: RNA-binding KH domain-containing protein (TAIR:AT4G…	K Homology domain | K Homology domain, type 1	NO
AT1G09680	0.63041	1.22904	0.00696982	0.0352849	UP	Pentatricopeptide repeat (PPR) superfamily protein	Pentatricopeptide repeat (PPR) superfamily protein; CONTAINS InterPro DOMAIN/s: Pentatricopeptide repeat (InterPro:IPR002885); BEST Arabidopsis thaliana protein match is: Tetratricopeptide repeat (TPR)-like superfamily protein (TAIR:AT5G39710.1)	Pentatricopeptide repeat	NO
AT1G09700	0.662234	3.31807	7.0167e-06	9.63799e-05	UP	dsRNA-binding domain-like superfamily protein	HYPONASTIC LEAVES 1 (HYL1); CONTAINS InterPro DOMAIN/s: Double-stranded RNA-binding (InterPro:IPR001159), Double-stranded RNA-binding-like (InterPro:IPR014720); BEST Arabidopsis thaliana protein match is: dsRNA-binding protein 2 (TAIR:AT2G28380.1)	Double-stranded RNA-binding domain | Ribonuclease III	NO
AT1G09710	0.671909	3.21039	1.03043e-05	0.000135518	UP	Homeodomain-like superfamily protein	Homeodomain-like superfamily protein; FUNCTIONS IN: DNA binding; INVOLVED IN: regulation of transcription; CONTAINS InterPro DOMAIN/s: SANT, DNA-binding (InterPro:IPR001005), Homeodomain-like (InterPro:IPR009057), Myb, DNA-binding (InterPro:IPR014778), HTH transcriptional regulator, Myb-type, DNA-binding (InterPro:IPR017930), Homeodomain-related (InterPro:IPR012287), Myb transcription factor (Int…	Homeodomain-like | Myb domain | SANT/Myb domain	NO
AT1G09730	0.430414	5.61612	4.29914e-06	6.19595e-05	UP	Cysteine proteinases superfamily protein	Cysteine proteinases superfamily protein; FUNCTIONS IN: cysteine-type peptidase activity; INVOLVED IN: proteolysis; LOCATED IN: cellular_component unknown; EXPRESSED IN: 23 plant structures; EXPRESSED IN: 24 plant structures; EXPRESSED DURING: 14 growth stages; CONTAINS InterPro DOMAIN/s: Peptidase C48, SUMO/Sentrin/Ubl1 (InterPro:IPR003653); BEST Arabidopsis thaliana protein match is: Cysteine p…	Peptidase C48, SUMO/Sentrin/Ubl1	NO
AT1G09750	0.558632	6.78859	1.20368e-06	1.97762e-05	UP	Eukaryotic aspartyl protease family protein	Eukaryotic aspartyl protease family protein; FUNCTIONS IN: aspartic-type endopeptidase activity; INVOLVED IN: proteolysis; LOCATED IN: apoplast, cell wall, plant-type cell wall; EXPRESSED IN: 22 plant structures; EXPRESSED DURING: 14 growth stages; CONTAINS InterPro DOMAIN/s: Peptidase aspartic (InterPro:IPR021109), Peptidase aspartic, catalytic (InterPro:IPR009007), Peptidase A1 (InterPro:IPR001…	Aspartic peptidase | Aspartic peptidase domain	NO
AT1G09770	0.434087	7.06631	2.03917e-05	0.0002475	UP	cell division cycle 5	cell division cycle 5 (CDC5); FUNCTIONS IN: DNA binding, sequence-specific DNA binding transcription factor activity; INVOLVED IN: defense response signaling pathway, resistance gene-independent, defense response signaling pathway, resistance gene-dependent, defense response to bacterium, defense response to fungus, regulation of transcription; LOCATED IN: chloroplast; EXPRESSED IN: 24 plant stru…	Domain of unknown function DUF3351 | Homeodomain-like | Myb domain | SANT/Myb domain	NO
AT1G09810	0.451829	3.33173	0.00701094	0.0354443	UP	evolutionarily conserved C-terminal region 11	evolutionarily conserved C-terminal region 11 (ECT11); CONTAINS InterPro DOMAIN/s: YTH domain (InterPro:IPR007275); BEST Arabidopsis thaliana protein match is: evolutionarily conserved C-terminal region 8 (TAIR:AT1G79270.1)	YTH domain	NO
AT1G09812	-0.959663	-0.597117	0.00361963	0.0206632	DOWN		unknown protein; BEST Arabidopsis thaliana protein match is: unknown protein (TAIR:AT1G58007.2)		NO
AT1G09820	-0.742513	2.59529	1.55244e-05	0.000194523	DOWN	Pentatricopeptide repeat (PPR-like) superfamily protein	Pentatricopeptide repeat (PPR-like) superfamily protein; CONTAINS InterPro DOMAIN/s: Pentatricopeptide repeat (InterPro:IPR002885); BEST Arabidopsis thaliana protein match is: Tetratricopeptide repeat (TPR)-like superfamily protein (TAIR:AT5G39710.1)	Pentatricopeptide repeat | Tetratricopeptide-like helical domain	NO
AT1G09940	0.49628	4.4535	3.49657e-06	5.16073e-05	UP	Glutamyl-tRNA reductase family protein	HEMA2; FUNCTIONS IN: glutamyl-tRNA reductase activity; INVOLVED IN: response to oxidative stress, heme biosynthetic process, tetrapyrrole biosynthetic process, porphyrin biosynthetic process; LOCATED IN: cytoplasm; EXPRESSED IN: 23 plant structures; EXPRESSED DURING: 15 growth stages; CONTAINS InterPro DOMAIN/s: Quinate/shikimate 5-dehydrogenase/glutamyl-tRNA reductase (InterPro:IPR006151), Tetra…	Glutamyl-tRNA reductase, conserved site | NAD(P)-binding domain | Quinate/shikimate 5-dehydrogenase/glutamyl-tRNA reductase | Tetrapyrrole biosynthesis, glutamyl-tRNA reductase | Tetrapyrrole biosynthesis, glutamyl-tRNA reductase, N-terminal | Tetrapyrrole biosynthesis, glutamyl-tRNA reductase, dimerisation domain	NO
AT1G09950	1.89987	-1.65374	0.00303083	0.0178339	UP	RESPONSE TO ABA AND SALT 1	RESPONSE TO ABA AND SALT 1 (RAS1); FUNCTIONS IN: molecular_function unknown; INVOLVED IN: biological_process unknown; LOCATED IN: endomembrane system; EXPRESSED IN: leaf apex, root, flower, leaf; EXPRESSED DURING: petal differentiation and expansion stage; BEST Arabidopsis thaliana protein match is: transcription factor-related (TAIR:AT1G58330.1)	Transcription factor TGA like domain	NO
AT1G09960	0.512872	2.22161	0.0101919	0.0484643	UP	sucrose transporter 4	sucrose transporter 4 (SUT4); FUNCTIONS IN: sucrose transmembrane transporter activity, carbohydrate transmembrane transporter activity, sugar:hydrogen symporter activity, sucrose:hydrogen symporter activity; INVOLVED IN: sucrose transport, transmembrane transport; LOCATED IN: plasma membrane, vacuole, membrane; EXPRESSED IN: 24 plant structures; EXPRESSED DURING: 13 growth stages; CONTAINS Inter…	Major facilitator superfamily domain, general substrate transporter | Sucrose/H+ symporter, plant	NO
AT1G09970	0.566294	6.50654	1.50631e-06	2.4182e-05	UP	Leucine-rich receptor-like protein kinase family protein	LRR XI-23; FUNCTIONS IN: protein serine/threonine kinase activity, protein kinase activity, kinase activity, ATP binding; INVOLVED IN: protein amino acid phosphorylation, transmembrane receptor protein tyrosine kinase signaling pathway, protein amino acid autophosphorylation; LOCATED IN: plasma membrane; EXPRESSED IN: 22 plant structures; EXPRESSED DURING: 14 growth stages; CONTAINS InterPro DOMA…	Leucine rich repeat 4 | Leucine-rich repeat | Leucine-rich repeat-containing N-terminal, type 2 | Protein kinase domain | Protein kinase-like domain | Serine/threonine-protein kinase, active site	NO
AT1G10020	2.53698	4.66748	1.14806e-23	2.28803e-21	UP	Protein of unknown function (DUF1005)	Protein of unknown function (DUF1005); CONTAINS InterPro DOMAIN/s: Protein of unknown function DUF1005 (InterPro:IPR010410); BEST Arabidopsis thaliana protein match is: Protein of unknown function (DUF1005) (TAIR:AT4G29310.1)	Protein of unknown function DUF1005	NO
AT1G10070	2.21972	5.66708	3.60952e-21	5.55124e-19	UP	branched-chain amino acid transaminase 2	branched-chain amino acid transaminase 2 (BCAT-2); FUNCTIONS IN: branched-chain-amino-acid transaminase activity, catalytic activity; INVOLVED IN: branched chain family amino acid metabolic process, metabolic process; LOCATED IN: chloroplast; EXPRESSED IN: 21 plant structures; EXPRESSED DURING: 14 growth stages; CONTAINS InterPro DOMAIN/s: Aminotransferase, class IV (InterPro:IPR001544), Aminotra…	Aminotransferase, class IV | Aminotransferase, class IV, conserved site | Branched-chain amino acid aminotransferase II	NO
AT1G10095	0.564962	2.99466	0.000560383	0.00432117	UP	Protein prenylyltransferase superfamily protein	Protein prenylyltransferase superfamily protein; FUNCTIONS IN: protein prenyltransferase activity; INVOLVED IN: protein amino acid prenylation; LOCATED IN: cellular_component unknown; CONTAINS InterPro DOMAIN/s: Protein prenyltransferase (InterPro:IPR008940), Protein prenyltransferase, alpha subunit (InterPro:IPR002088)	Protein prenyltransferase, alpha subunit	YES	1:3297395:G-GA;exonic_variant
AT1G10110	1.91991	-1.08543	2.47695e-05	0.000294584	UP	F-box family protein	F-box family protein; BEST Arabidopsis thaliana protein match is: F-box family protein with a domain of unknown function (DUF295) (TAIR:AT4G22165.1)	F-box domain | Quinoprotein amine dehydrogenase, beta chain-like	NO
AT1G10120	1.16946	4.75582	3.62156e-19	4.5514e-17	UP	basic helix-loop-helix (bHLH) DNA-binding superfamily protein	basic helix-loop-helix (bHLH) DNA-binding superfamily protein; FUNCTIONS IN: DNA binding, sequence-specific DNA binding transcription factor activity; INVOLVED IN: regulation of transcription; LOCATED IN: nucleus; EXPRESSED IN: 22 plant structures; EXPRESSED DURING: 13 growth stages; CONTAINS InterPro DOMAIN/s: Helix-loop-helix DNA-binding domain (InterPro:IPR001092), Helix-loop-helix DNA-binding…	Myc-type, basic helix-loop-helix (bHLH) domain	NO
AT1G10140	1.02256	5.14882	2.04947e-15	1.4657e-13	UP	Uncharacterised conserved protein UCP031279	Uncharacterised conserved protein UCP031279; FUNCTIONS IN: molecular_function unknown; INVOLVED IN: biological_process unknown; LOCATED IN: plasma membrane; EXPRESSED IN: 23 plant structures; EXPRESSED DURING: 13 growth stages; CONTAINS InterPro DOMAIN/s: Uncharacterised conserved protein UCP031279 (InterPro:IPR016972); BEST Arabidopsis thaliana protein match is: Uncharacterised conserved protein…	Uncharacterised conserved protein UCP031279	NO
AT1G10150	0.602741	5.97513	1.51545e-06	2.43172e-05	UP	Carbohydrate-binding protein	Carbohydrate-binding protein; FUNCTIONS IN: carbohydrate binding; LOCATED IN: mitochondrion; EXPRESSED IN: 24 plant structures; EXPRESSED DURING: 15 growth stages; BEST Arabidopsis thaliana protein match is: Carbohydrate-binding protein (TAIR:AT1G59510.1)		NO
AT1G10160	-0.53704	3.0065	0.00208486	0.0130375	DOWN	transposable element gene	non-LTR retrotransposon family (LINE), has a 3.9e-39 P-value blast match to GB:AAA67727 reverse transcriptase (LINE-element) (Mus musculus)		NO
AT1G10170	0.437549	5.86842	4.05161e-06	5.89725e-05	UP	NF-X-like 1	NF-X-like 1 (NFXL1); FUNCTIONS IN: zinc ion binding, sequence-specific DNA binding transcription factor activity; INVOLVED IN: in 6 processes; LOCATED IN: nucleus; EXPRESSED IN: 27 plant structures; EXPRESSED DURING: 15 growth stages; CONTAINS InterPro DOMAIN/s: Zinc finger, NF-X1-type (InterPro:IPR000967), Zinc finger, PHD-type, conserved site (InterPro:IPR019786), Zinc finger, RING-type (InterP…	Zinc finger, NF-X1-type | Zinc finger, PHD-finger | Zinc finger, PHD-type, conserved site | Zinc finger, RING-type	NO
AT1G10200	0.406106	6.07134	0.000122706	0.00118048	UP	GATA type zinc finger transcription factor family protein	WLIM1; FUNCTIONS IN: sequence-specific DNA binding transcription factor activity, zinc ion binding; INVOLVED IN: biological_process unknown; LOCATED IN: plasma membrane; EXPRESSED IN: 23 plant structures; EXPRESSED DURING: 13 growth stages; CONTAINS InterPro DOMAIN/s: Zinc finger, LIM-type (InterPro:IPR001781); BEST Arabidopsis thaliana protein match is: GATA type zinc finger transcription factor…	Zinc finger, LIM-type	NO
AT1G10220	1.25597	-0.805139	0.00161058	0.010521	UP		BEST Arabidopsis thaliana protein match is: ZCF37 (TAIR:AT1G59590.1); unknown protein; FUNCTIONS IN: molecular_function unknown; INVOLVED IN: biological_process unknown		NO
AT1G10230	0.537328	2.94335	0.000537159	0.0041658	UP	SKP1-like 18	SKP1-like 18 (SK18); FUNCTIONS IN: ubiquitin-protein ligase activity, protein binding; INVOLVED IN: ubiquitin-dependent protein catabolic process; EXPRESSED IN: 26 plant structures; EXPRESSED DURING: 13 growth stages; CONTAINS InterPro DOMAIN/s: E3 ubiquitin ligase, SCF complex, Skp subunit (InterPro:IPR016897), SKP1 component, dimerisation (InterPro:IPR016072), SKP1 component (InterPro:IPR001232…		NO
AT1G10240	0.524169	3.76632	3.62677e-05	0.000411428	UP	FAR1-related sequence 11	FAR1-related sequence 11 (FRS11); FUNCTIONS IN: zinc ion binding; INVOLVED IN: response to red or far red light; LOCATED IN: cellular_component unknown; EXPRESSED IN: 20 plant structures; EXPRESSED DURING: 12 growth stages; CONTAINS InterPro DOMAIN/s: MULE transposase, conserved domain (InterPro:IPR018289), Transcription factor, FAR1-related (InterPro:IPR004330), Zinc finger, PMZ-type (InterPro:I…	FAR1 DNA binding domain | MULE transposase domain | Zinc finger, PMZ-type | Zinc finger, SWIM-type	NO
AT1G10270	0.516226	2.46808	0.00512807	0.0275205	UP	glutamine-rich protein 23	glutamine-rich protein 23 (GRP23); FUNCTIONS IN: binding; INVOLVED IN: embryo development, cell division; LOCATED IN: nucleus; EXPRESSED IN: 26 plant structures; EXPRESSED DURING: 14 growth stages; CONTAINS InterPro DOMAIN/s: Pentatricopeptide repeat (InterPro:IPR002885), Tetratricopeptide-like helical (InterPro:IPR011990); BEST Arabidopsis thaliana protein match is: Pentatricopeptide repeat (PPR…	Pentatricopeptide repeat | Tetratricopeptide-like helical domain	NO
AT1G10310	-0.493754	4.20463	6.51077e-05	0.000680811	DOWN	NAD(P)-binding Rossmann-fold superfamily protein	NAD(P)-binding Rossmann-fold superfamily protein; CONTAINS InterPro DOMAIN/s: Short-chain dehydrogenase/reductase, conserved site (InterPro:IPR020904), NAD(P)-binding domain (InterPro:IPR016040), Glucose/ribitol dehydrogenase (InterPro:IPR002347), Short-chain dehydrogenase/reductase SDR (InterPro:IPR002198); BEST Arabidopsis thaliana protein match is: NAD(P)-binding Rossmann-fold superfamily prot…	Glucose/ribitol dehydrogenase | NAD(P)-binding domain | Short-chain dehydrogenase/reductase SDR | Short-chain dehydrogenase/reductase, conserved site	NO
AT1G10320	0.433511	4.62975	0.000352252	0.00290434	UP	Zinc finger C-x8-C-x5-C-x3-H type family protein	Zinc finger C-x8-C-x5-C-x3-H type family protein; FUNCTIONS IN: RNA binding, nucleotide binding, zinc ion binding, nucleic acid binding; LOCATED IN: nucleus; EXPRESSED IN: 22 plant structures; EXPRESSED DURING: 13 growth stages; CONTAINS InterPro DOMAIN/s: Zinc finger, CCCH-type (InterPro:IPR000571), RNA recognition motif, RNP-1 (InterPro:IPR000504), Nucleotide-binding, alpha-beta plait (InterPro…	Nucleotide-binding, alpha-beta plait | RNA recognition motif domain | RNA recognition motif domain, eukaryote | U2 auxiliary factor small subunit | Zinc finger, CCCH-type	NO
AT1G10350	-0.65521	3.87781	7.88478e-06	0.000106904	DOWN	DNAJ heat shock family protein	DNAJ heat shock family protein; FUNCTIONS IN: unfolded protein binding, heat shock protein binding; INVOLVED IN: protein folding; LOCATED IN: cellular_component unknown; EXPRESSED IN: 22 plant structures; EXPRESSED DURING: 13 growth stages; CONTAINS InterPro DOMAIN/s: Molecular chaperone, heat shock protein, Hsp40, DnaJ (InterPro:IPR015609), HSP40/DnaJ peptide-binding (InterPro:IPR008971), Chaper…	Chaperone DnaJ, C-terminal | DnaJ domain | DnaJ domain, conserved site | HSP40/DnaJ peptide-binding	NO
AT1G10360	-0.603646	5.75173	2.90274e-09	8.02687e-08	DOWN	glutathione S-transferase TAU 18	glutathione S-transferase TAU 18 (GSTU18); CONTAINS InterPro DOMAIN/s: Thioredoxin fold (InterPro:IPR012335), Glutathione S-transferase, C-terminal (InterPro:IPR004046), Glutathione S-transferase, C-terminal-like (InterPro:IPR010987), Glutathione S-transferase/chloride channel, C-terminal (InterPro:IPR017933), Glutathione S-transferase, N-terminal (InterPro:IPR004045), Thioredoxin-like fold (Inte…	Glutathione S-transferase, C-terminal | Glutathione S-transferase, C-terminal-like | Glutathione S-transferase, N-terminal | Thioredoxin-like fold	NO
AT1G10370	-0.530691	5.51548	6.84967e-05	0.00071359	DOWN	Glutathione S-transferase family protein	EARLY-RESPONSIVE TO DEHYDRATION 9 (ERD9); FUNCTIONS IN: glutathione transferase activity; INVOLVED IN: response to water deprivation, response to karrikin, toxin catabolic process; LOCATED IN: chloroplast, cytoplasm; EXPRESSED IN: 21 plant structures; EXPRESSED DURING: 14 growth stages; CONTAINS InterPro DOMAIN/s: Thioredoxin fold (InterPro:IPR012335), Glutathione S-transferase, C-terminal (Inter…	Glutathione S-transferase, C-terminal | Glutathione S-transferase, C-terminal-like | Glutathione S-transferase, N-terminal | Thioredoxin-like fold	NO
AT1G10385	3.02292	-1.92941	4.11265e-06	5.96546e-05	UP	Vps51/Vps67 family (components of vesicular transport) protein	Vps51/Vps67 family (components of vesicular transport) protein; CONTAINS InterPro DOMAIN/s: Vps51/Vps67 (InterPro:IPR014812); BEST Arabidopsis thaliana protein match is: exocyst complex component 84B (TAIR:AT5G49830.1)		NO
AT1G10390	0.32923	6.44544	0.000230431	0.00201693	UP	Nucleoporin autopeptidase	Nucleoporin autopeptidase; FUNCTIONS IN: transporter activity; INVOLVED IN: transport; LOCATED IN: chloroplast, nuclear pore; EXPRESSED IN: 24 plant structures; EXPRESSED DURING: 14 growth stages; CONTAINS InterPro DOMAIN/s: Peptidase S59, nucleoporin (InterPro:IPR007230); BEST Arabidopsis thaliana protein match is: Nucleoporin autopeptidase (TAIR:AT1G59660.1)	Peptidase S59, nucleoporin	NO
AT1G10450	0.321793	4.96885	0.00231532	0.01422	UP	SIN3-like 6	SIN3-like 6 (SNL6); INVOLVED IN: regulation of transcription, DNA-dependent; LOCATED IN: nucleus; EXPRESSED IN: cultured cell; CONTAINS InterPro DOMAIN/s: Histone deacetylase interacting (InterPro:IPR013194), Paired amphipathic helix (InterPro:IPR003822); BEST Arabidopsis thaliana protein match is: SIN3-like 5 (TAIR:AT1G59890.1)		NO
AT1G10480	0.719322	1.82884	0.00411775	0.0229771	UP	zinc finger protein 5	zinc finger protein 5 (ZFP5); FUNCTIONS IN: sequence-specific DNA binding transcription factor activity, zinc ion binding, nucleic acid binding; INVOLVED IN: regulation of transcription; LOCATED IN: intracellular, chloroplast; EXPRESSED IN: inflorescence meristem, hypocotyl, root, flower; EXPRESSED DURING: petal differentiation and expansion stage; CONTAINS InterPro DOMAIN/s: Zinc finger, C2H2-ty…	Zinc finger C2H2-type/integrase DNA-binding domain | Zinc finger, C2H2 | Zinc finger, C2H2-like	NO
AT1G10500	-0.339731	6.22662	0.000396722	0.00321743	DOWN	chloroplast-localized ISCA-like protein	chloroplast-localized ISCA-like protein (CPISCA); CONTAINS InterPro DOMAIN/s: FeS cluster insertion, C-terminal, conserved site (InterPro:IPR017870), FeS cluster biogenesis (InterPro:IPR000361), FeS cluster insertion (InterPro:IPR016092); BEST Arabidopsis thaliana protein match is: Iron-sulphur cluster biosynthesis family protein (TAIR:AT5G03905.1)	FeS cluster biogenesis | FeS cluster insertion protein | FeS cluster insertion, C-terminal, conserved site	NO
AT1G10522	-0.396769	4.22085	0.00142492	0.00947349	DOWN		unknown protein; FUNCTIONS IN: molecular_function unknown; INVOLVED IN: biological_process unknown; LOCATED IN: chloroplast; EXPRESSED IN: 23 plant structures; EXPRESSED DURING: 13 growth stages		NO
AT1G10550	4.71754	2.2149	1.72665e-09	5.00045e-08	UP	xyloglucan:xyloglucosyl transferase 33	xyloglucan:xyloglucosyl transferase 33 (XTH33); FUNCTIONS IN: hydrolase activity, acting on glycosyl bonds, hydrolase activity, hydrolyzing O-glycosyl compounds, xyloglucan:xyloglucosyl transferase activity; INVOLVED IN: plant-type cell wall modification involved in multidimensional cell growth; LOCATED IN: integral to plasma membrane; EXPRESSED IN: 14 plant structures; EXPRESSED DURING: 7 growth…	Concanavalin A-like lectin/glucanase, subgroup | Concanavalin A-like lectin/glucanases superfamily | Glycoside hydrolase, family 16 | Xyloglucan endo-transglycosylase, C-terminal | Xyloglucan endotransglucosylase/hydrolase	NO
AT1G10585	-0.91632	2.93604	1.16569e-07	2.35523e-06	DOWN	basic helix-loop-helix (bHLH) DNA-binding superfamily protein	basic helix-loop-helix (bHLH) DNA-binding superfamily protein; FUNCTIONS IN: sequence-specific DNA binding transcription factor activity; INVOLVED IN: regulation of transcription; LOCATED IN: nucleus; EXPRESSED IN: 7 plant structures; EXPRESSED DURING: LP.06 six leaves visible, 4 anthesis, LP.10 ten leaves visible, petal differentiation and expansion stage, LP.08 eight leaves visible; CONTAINS In…	Myc-type, basic helix-loop-helix (bHLH) domain	NO
AT1G10610	-1.98215	3.24261	2.60117e-33	1.18392e-30	DOWN	basic helix-loop-helix (bHLH) DNA-binding superfamily protein	basic helix-loop-helix (bHLH) DNA-binding superfamily protein; FUNCTIONS IN: DNA binding, sequence-specific DNA binding transcription factor activity; INVOLVED IN: regulation of transcription; LOCATED IN: nucleus; EXPRESSED IN: 22 plant structures; EXPRESSED DURING: 13 growth stages; CONTAINS InterPro DOMAIN/s: Helix-loop-helix DNA-binding domain (InterPro:IPR001092), Helix-loop-helix DNA-binding…	Myc-type, basic helix-loop-helix (bHLH) domain | Transcription factor MYC/MYB N-terminal	NO
AT1G10640	-1.28035	5.01127	4.01135e-17	3.60283e-15	DOWN	Pectin lyase-like superfamily protein	Pectin lyase-like superfamily protein; FUNCTIONS IN: polygalacturonase activity; INVOLVED IN: carbohydrate metabolic process; LOCATED IN: cellular_component unknown; EXPRESSED IN: 18 plant structures; EXPRESSED DURING: 11 growth stages; CONTAINS InterPro DOMAIN/s: Pectin lyase fold/virulence factor (InterPro:IPR011050), Parallel beta-helix repeat (InterPro:IPR006626), Glycoside hydrolase, family …	Glycoside hydrolase, family 28 | Parallel beta-helix repeat | Pectin lyase fold | Pectin lyase fold/virulence factor	NO
AT1G10650	-0.481986	4.175	2.31776e-05	0.000277513	DOWN	SBP (S-ribonuclease binding protein) family protein	SBP (S-ribonuclease binding protein) family protein; FUNCTIONS IN: zinc ion binding; INVOLVED IN: biological_process unknown; LOCATED IN: cellular_component unknown; EXPRESSED IN: 24 plant structures; EXPRESSED DURING: 15 growth stages; CONTAINS InterPro DOMAIN/s: Zinc finger, RING-type (InterPro:IPR001841), S-ribonuclease binding protein, SBP1, pollen (InterPro:IPR017066); BEST Arabidopsis thali…	S-ribonuclease binding protein, SBP1, pollen | Zinc finger, RING-type	NO
AT1G10657	-1.2873	1.9028	9.69565e-10	2.93668e-08	DOWN	Plant protein 1589 of unknown function	Plant protein 1589 of unknown function; FUNCTIONS IN: molecular_function unknown; INVOLVED IN: biological_process unknown; LOCATED IN: cellular_component unknown; CONTAINS InterPro DOMAIN/s: Conserved hypothetical protein CHP01589, plant (InterPro:IPR006476); BEST Arabidopsis thaliana protein match is: Plant protein 1589 of unknown function (TAIR:AT3G55240.1)	Conserved hypothetical protein CHP01589, plant	NO
AT1G10682	0.739934	5.36528	7.12948e-07	1.22514e-05	UP	other RNA			NO
AT1G10690	0.492645	3.4627	0.00184748	0.0118007	UP		unknown protein; BEST Arabidopsis thaliana protein match is: unknown protein (TAIR:AT1G60783.1)		NO
AT1G10700	0.390062	4.67401	0.000177549	0.00161057	UP	phosphoribosyl pyrophosphate (PRPP) synthase 3	phosphoribosyl pyrophosphate (PRPP) synthase 3 (PRS3); FUNCTIONS IN: magnesium ion binding, ribose phosphate diphosphokinase activity; INVOLVED IN: nucleotide biosynthetic process, nucleoside metabolic process; LOCATED IN: chloroplast; EXPRESSED IN: 23 plant structures; EXPRESSED DURING: 15 growth stages; CONTAINS InterPro DOMAIN/s: Phosphoribosyltransferase (InterPro:IPR000836), Phosphoribosyl p…	Phosphoribosyltransferase domain | Phosphoribosyltransferase-like | Ribose-phosphate diphosphokinase | Ribose-phosphate pyrophosphokinase, N-terminal domain	NO
AT1G10760	0.535125	8.19752	5.80503e-08	1.24693e-06	UP	Pyruvate phosphate dikinase, PEP/pyruvate binding domain	STARCH EXCESS 1 (SEX1); FUNCTIONS IN: protein binding, alpha-glucan, water dikinase activity; INVOLVED IN: cold acclimation, response to symbiotic fungus, response to trehalose stimulus, circadian rhythm, starch catabolic process; LOCATED IN: mitochondrion, chloroplast stroma, chloroplast, chloroplast envelope; EXPRESSED IN: 24 plant structures; EXPRESSED DURING: 14 growth stages; CONTAINS InterP…	ATP-grasp fold, subdomain 1 | ATP-grasp fold, subdomain 2 | Pyruvate phosphate dikinase, PEP/pyruvate-binding	NO
AT1G10830	-0.437488	4.75843	0.00059308	0.00452754	DOWN	15-cis-zeta-carotene isomerase	15-cis-zeta-carotene isomerase (Z-ISO); FUNCTIONS IN: 9,15,9'-tri-cis-zeta-carotene isomerase activity; INVOLVED IN: carotene biosynthetic process; LOCATED IN: chloroplast; EXPRESSED IN: 22 plant structures; EXPRESSED DURING: 13 growth stages; CONTAINS InterPro DOMAIN/s: NnrU (InterPro:IPR009915)	NnrU	NO
AT1G10850	-0.386921	4.55199	0.000794785	0.00580173	DOWN	Leucine-rich repeat protein kinase family protein	Leucine-rich repeat protein kinase family protein; FUNCTIONS IN: protein serine/threonine kinase activity, protein kinase activity, ATP binding; INVOLVED IN: transmembrane receptor protein tyrosine kinase signaling pathway, protein amino acid phosphorylation; LOCATED IN: endomembrane system; EXPRESSED IN: 22 plant structures; EXPRESSED DURING: 13 growth stages; CONTAINS InterPro DOMAIN/s: Protein…	Concanavalin A-like lectin/glucanase, subgroup | Leucine-rich repeat | Leucine-rich repeat-containing N-terminal, type 2 | Protein kinase domain | Protein kinase-like domain	NO
AT1G10890	-0.657605	5.88283	2.78076e-10	9.10191e-09	DOWN		unknown protein; FUNCTIONS IN: molecular_function unknown; INVOLVED IN: biological_process unknown; LOCATED IN: chloroplast; EXPRESSED IN: petal, flower, leaf; EXPRESSED DURING: LP.04 four leaves visible, 4 anthesis, petal differentiation and expansion stage; BEST Arabidopsis thaliana protein match is: unknown protein (TAIR:AT5G13340.1)		NO
AT1G10900	-0.357245	6.23497	0.00387894	0.0219132	DOWN	Phosphatidylinositol-4-phosphate 5-kinase family protein	Phosphatidylinositol-4-phosphate 5-kinase family protein; FUNCTIONS IN: 1-phosphatidylinositol-4-phosphate 5-kinase activity, phosphatidylinositol phosphate kinase activity, ATP binding; INVOLVED IN: phosphatidylinositol metabolic process; LOCATED IN: plasma membrane; EXPRESSED IN: 21 plant structures; EXPRESSED DURING: 13 growth stages; CONTAINS InterPro DOMAIN/s: Phosphatidylinositol-4-phosphat…	MORN motif | Phosphatidylinositol-4-phosphate 5-kinase | Phosphatidylinositol-4-phosphate 5-kinase, C-terminal | Phosphatidylinositol-4-phosphate 5-kinase, N-terminal domain | Phosphatidylinositol-4-phosphate 5-kinase, core | Phosphatidylinositol-4-phosphate 5-kinase, core, subgroup | Phosphatidylinositol-4-phosphate 5-kinase, plant	NO
AT1G10910	-0.449878	5.59739	3.95608e-06	5.77204e-05	DOWN	Pentatricopeptide repeat (PPR) superfamily protein	Pentatricopeptide repeat (PPR) superfamily protein; CONTAINS InterPro DOMAIN/s: Pentatricopeptide repeat (InterPro:IPR002885); BEST Arabidopsis thaliana protein match is: plastid transcriptionally active 2 (TAIR:AT1G74850.1)	Pentatricopeptide repeat	NO
AT1G10920	-1.01727	3.57344	2.04966e-15	1.4657e-13	DOWN	NB-ARC domain-containing disease resistance protein	LOV1; FUNCTIONS IN: ATP binding; INVOLVED IN: defense response to fungus, response to molecule of fungal origin, defense response; LOCATED IN: cellular_component unknown; EXPRESSED IN: 14 plant structures; EXPRESSED DURING: 7 growth stages; CONTAINS InterPro DOMAIN/s: NB-ARC (InterPro:IPR002182), Disease resistance protein (InterPro:IPR000767); BEST Arabidopsis thaliana protein match is: Disease …	NB-ARC | P-loop containing nucleoside triphosphate hydrolase	NO
AT1G10940	0.436999	6.68265	1.557e-05	0.000195022	UP	Protein kinase superfamily protein	Protein kinase superfamily protein; SNF1-related protein kinase 2.4 (SNRK2.4); CONTAINS InterPro DOMAIN/s: Protein kinase, ATP binding site (InterPro:IPR017441), Serine/threonine-protein kinase domain (InterPro:IPR002290), Serine/threonine-protein kinase-like domain (InterPro:IPR017442), Protein kinase-like domain (InterPro:IPR011009), Serine/threonine-protein kinase, active site (InterPro:IPR008…	Protein kinase domain | Protein kinase, ATP binding site | Protein kinase-like domain | Serine/threonine-protein kinase, active site | Serine/threonine/dual specificity protein kinase, catalytic domain	NO
AT1G10960	-0.456889	7.50248	4.32328e-06	6.22542e-05	DOWN	ferredoxin 1	ferredoxin 1 (FD1); FUNCTIONS IN: electron carrier activity, iron-sulfur cluster binding, 2 iron, 2 sulfur cluster binding; INVOLVED IN: response to karrikin; LOCATED IN: chloroplast stroma, chloroplast; EXPRESSED IN: 22 plant structures; EXPRESSED DURING: 13 growth stages; CONTAINS InterPro DOMAIN/s: 2Fe-2S ferredoxin, iron-sulphur binding site (InterPro:IPR006058), Ferredoxin (InterPro:IPR00104…	2Fe-2S ferredoxin, iron-sulphur binding site | 2Fe-2S ferredoxin-type domain | Beta-grasp domain | Ferredoxin [2Fe-2S], plant	NO
AT1G11060	0.336956	4.45253	0.00253155	0.0153222	UP	WAPL (Wings apart-like protein regulation of heterochromatin) protein	WAPL (Wings apart-like protein regulation of heterochromatin) protein; BEST Arabidopsis thaliana protein match is: WAPL (Wings apart-like protein regulation of heterochromatin) protein (TAIR:AT1G61030.1)	Armadillo-type fold | Wings apart-like protein	NO
AT1G11150	-1.20078	2.27864	1.56495e-08	3.80845e-07	DOWN	transposable element gene	pseudogene, similar to putative AP endonuclease/reverse transcriptase, blastp match of 30% identity and 3.2e-59 P-value to GP|21952510|gb|AAM82604.1|AF525305_2|AF525305 putative AP endonuclease/reverse transcriptase {Brassica napus}		NO
AT1G11175	0.393715	4.05911	0.000752011	0.00553628	UP	other RNA			NO
AT1G11185	0.935573	-0.612398	0.003441	0.019801	UP	other RNA			NO
AT1G11240	0.331498	4.43165	0.00264789	0.0159058	UP		CONTAINS InterPro DOMAIN/s: Nucleolar protein 12 (InterPro:IPR019186)	Nucleolar protein 12	NO
AT1G11260	2.18564	9.66329	4.15349e-23	7.9036e-21	UP	sugar transporter 1	sugar transporter 1 (STP1); FUNCTIONS IN: carbohydrate transmembrane transporter activity, sugar:hydrogen symporter activity; INVOLVED IN: transport, transmembrane transport; LOCATED IN: nucleus, plasma membrane, vacuole, membrane; EXPRESSED IN: 25 plant structures; EXPRESSED DURING: 13 growth stages; CONTAINS InterPro DOMAIN/s: Sugar transporter, conserved site (InterPro:IPR005829), Major facili…	General substrate transporter | Major facilitator superfamily domain | Major facilitator superfamily domain, general substrate transporter | Sugar transporter, conserved site | Sugar/inositol transporter	NO
AT1G11270	-1.0643	2.19837	2.32905e-07	4.42705e-06	DOWN	F-box and associated interaction domains-containing protein	F-box and associated interaction domains-containing protein; CONTAINS InterPro DOMAIN/s: F-box domain, cyclin-like (InterPro:IPR001810), F-box domain, Skp2-like (InterPro:IPR022364); CONTAINS InterPro DOMAIN/s: F-box domain, cyclin-like (InterPro:IPR001810), F-box domain, Skp2-like (InterPro:IPR022364), F-box associated domain, type 1 (InterPro:IPR006527); BEST Arabidopsis thaliana protein match …	F-box associated domain, type 1 | F-box associated interaction domain | F-box domain	NO
AT1G11280	-0.873398	4.838	3.75527e-13	1.93396e-11	DOWN	S-locus lectin protein kinase family protein	S-locus lectin protein kinase family protein; FUNCTIONS IN: in 6 functions; INVOLVED IN: protein amino acid phosphorylation, recognition of pollen; EXPRESSED IN: 23 plant structures; LOCATED IN: endomembrane system; EXPRESSED DURING: 15 growth stages; CONTAINS InterPro DOMAIN/s: Curculin-like (mannose-binding) lectin (InterPro:IPR001480), PAN-2 domain (InterPro:IPR013227), Apple-like (InterPro:IP…	Apple-like | Bulb-type lectin domain | Concanavalin A-like lectin/glucanase, subgroup | PAN-2 domain | Protein kinase domain | Protein kinase-like domain | S-locus glycoprotein | S-receptor-like serine/threonine-protein kinase | Serine-threonine/tyrosine-protein kinase catalytic domain | Serine/threonine-protein kinase, active site	NO
AT1G11300	-1.25754	1.70986	4.60105e-10	1.4551e-08	DOWN	protein serine/threonine kinases;protein kinases;ATP binding;sugar binding;kinases;carbohydrate binding	protein serine/threonine kinases;protein kinases;ATP binding;sugar binding;kinases;carbohydrate binding; FUNCTIONS IN: in 6 functions; INVOLVED IN: protein amino acid phosphorylation, recognition of pollen; LOCATED IN: endomembrane system; EXPRESSED IN: 12 plant structures; EXPRESSED DURING: 6 growth stages; CONTAINS InterPro DOMAIN/s: Curculin-like (mannose-binding) lectin (InterPro:IPR001480), …		NO
AT1G11303	-0.591218	2.64684	0.00275582	0.016466	DOWN				NO
AT1G11310	0.341424	6.58539	0.000685944	0.00512382	UP	Seven transmembrane MLO family protein	MILDEW RESISTANCE LOCUS O 2 (MLO2); FUNCTIONS IN: calmodulin binding; INVOLVED IN: defense response to fungus, incompatible interaction, cell death, response to fungus, negative regulation of defense response, defense response; LOCATED IN: plasma membrane; EXPRESSED IN: 29 plant structures; EXPRESSED DURING: 14 growth stages; CONTAINS InterPro DOMAIN/s: Mlo-related protein (InterPro:IPR004326); B…	Mlo-related protein	NO
AT1G11350	0.479441	4.55391	2.82927e-05	0.000332262	UP	S-domain-1 13	S-domain-1 13 (SD1-13); CONTAINS InterPro DOMAIN/s: Curculin-like (mannose-binding) lectin (InterPro:IPR001480), Apple-like (InterPro:IPR003609), Protein kinase, ATP binding site (InterPro:IPR017441), PAN-2 domain (InterPro:IPR013227), Serine/threonine-protein kinase domain (InterPro:IPR002290), Serine-threonine/tyrosine-protein kinase (InterPro:IPR001245), Serine/threonine-protein kinase, active…	Apple-like | Bulb-type lectin domain | Concanavalin A-like lectin/glucanase, subgroup | PAN-2 domain | Protein kinase domain | Protein kinase, ATP binding site | Protein kinase-like domain | S-locus glycoprotein | S-receptor-like serine/threonine-protein kinase | Serine-threonine/tyrosine-protein kinase catalytic domain | Serine/threonine-protein kinase, active site	NO
AT1G11380	2.01807	3.91099	8.73364e-18	8.52631e-16	UP	PLAC8 family protein	PLAC8 family protein; CONTAINS InterPro DOMAIN/s: Protein of unknown function Cys-rich (InterPro:IPR006461); BEST Arabidopsis thaliana protein match is: PLAC8 family protein (TAIR:AT5G05350.1)	Uncharacterised protein family Cys-rich	NO
AT1G11390	0.347384	4.00538	0.00301122	0.0177372	UP	Protein kinase superfamily protein	Protein kinase superfamily protein; CONTAINS InterPro DOMAIN/s: ABC-1 (InterPro:IPR004147), Protein kinase-like domain (InterPro:IPR011009); BEST Arabidopsis thaliana protein match is: Protein kinase superfamily protein (TAIR:AT1G61640.1)	Protein kinase-like domain | UbiB domain	NO
AT1G11400	0.337353	4.89928	0.00120593	0.00824042	UP	partner of Y14-MAGO	partner of Y14-MAGO (PYM); FUNCTIONS IN: protein binding; INVOLVED IN: biological_process unknown; LOCATED IN: nucleoplasm, nucleolus, cytoplasm; EXPRESSED IN: 23 plant structures; EXPRESSED DURING: 15 growth stages; CONTAINS InterPro DOMAIN/s: Exon junction complex, Pym (InterPro:IPR015362)	Exon junction complex, Pym	NO
AT1G11410	-0.591883	5.16506	1.35351e-07	2.69909e-06	DOWN	S-locus lectin protein kinase family protein	S-locus lectin protein kinase family protein; FUNCTIONS IN: in 6 functions; INVOLVED IN: protein amino acid phosphorylation, recognition of pollen; LOCATED IN: endomembrane system; EXPRESSED IN: 21 plant structures; EXPRESSED DURING: 13 growth stages; CONTAINS InterPro DOMAIN/s: Curculin-like (mannose-binding) lectin (InterPro:IPR001480), Apple-like (InterPro:IPR003609), PAN-2 domain (InterPro:IP…	Apple-like | Bulb-type lectin domain | Epidermal growth factor-like domain | PAN-2 domain | Protein kinase domain | Protein kinase-like domain | S-locus glycoprotein | S-locus receptor kinase, C-terminal | S-receptor-like serine/threonine-protein kinase | Serine-threonine/tyrosine-protein kinase catalytic domain | Serine/threonine-protein kinase, active site	NO
AT1G11440	-1.54439	2.29311	1.65839e-14	1.04015e-12	DOWN		BEST Arabidopsis thaliana protein match is: glycine-rich protein (TAIR:AT3G29075.1)		NO
AT1G11480	0.462616	6.12771	6.47301e-07	1.12322e-05	UP	eukaryotic translation initiation factor-related	eukaryotic translation initiation factor-related; FUNCTIONS IN: molecular_function unknown; INVOLVED IN: biological_process unknown; LOCATED IN: cellular_component unknown; EXPRESSED IN: 23 plant structures; EXPRESSED DURING: 15 growth stages		NO
AT1G11580	0.567239	4.27909	0.00399208	0.0224133	UP	methylesterase PCR A	methylesterase PCR A (PMEPCRA); FUNCTIONS IN: enzyme inhibitor activity, pectinesterase activity; INVOLVED IN: cell wall modification; LOCATED IN: cell wall, plasma membrane, plant-type cell wall; EXPRESSED IN: 25 plant structures; EXPRESSED DURING: 13 growth stages; CONTAINS InterPro DOMAIN/s: Pectinesterase, active site (InterPro:IPR018040), Pectin lyase fold/virulence factor (InterPro:IPR01105…	Pectin lyase fold | Pectin lyase fold/virulence factor | Pectinesterase inhibitor domain | Pectinesterase, active site | Pectinesterase, catalytic	NO
AT1G11650	0.520945	7.90134	1.88466e-08	4.49555e-07	UP	RNA-binding (RRM/RBD/RNP motifs) family protein	RBP45B; FUNCTIONS IN: RNA binding; EXPRESSED IN: 26 plant structures; EXPRESSED DURING: 16 growth stages; CONTAINS InterPro DOMAIN/s: RNA recognition motif, RNP-1 (InterPro:IPR000504), Nucleotide-binding, alpha-beta plait (InterPro:IPR012677); BEST Arabidopsis thaliana protein match is: RNA-binding protein 45A (TAIR:AT5G54900.1)	Nucleotide-binding, alpha-beta plait | RNA recognition motif domain	NO
AT1G11660	0.484968	5.19685	3.53457e-07	6.46648e-06	UP	heat shock protein 70 (Hsp 70) family protein	heat shock protein 70 (Hsp 70) family protein; FUNCTIONS IN: ATP binding; INVOLVED IN: protein folding; LOCATED IN: cellular_component unknown; EXPRESSED IN: 24 plant structures; EXPRESSED DURING: 15 growth stages; CONTAINS InterPro DOMAIN/s: Heat shock protein Hsp70 (InterPro:IPR001023), Heat shock protein 70 (InterPro:IPR013126); BEST Arabidopsis thaliana protein match is: Heat shock protein 70…	Heat shock protein 70 family | Heat shock protein 70kD, C-terminal domain | Heat shock protein 70kD, peptide-binding domain	NO
AT1G11670	0.617948	3.32544	3.68994e-05	0.000417751	UP	MATE efflux family protein	MATE efflux family protein; FUNCTIONS IN: antiporter activity, drug transmembrane transporter activity, transporter activity; INVOLVED IN: drug transmembrane transport, N-terminal protein myristoylation, transmembrane transport; LOCATED IN: membrane; EXPRESSED IN: 22 plant structures; EXPRESSED DURING: 13 growth stages; CONTAINS InterPro DOMAIN/s: Multi antimicrobial extrusion protein MatE (Inter…	Multi antimicrobial extrusion protein	NO
AT1G11700	-0.573526	3.69658	0.000359845	0.00295897	DOWN	Protein of unknown function, DUF584	Protein of unknown function, DUF584; FUNCTIONS IN: molecular_function unknown; INVOLVED IN: biological_process unknown; LOCATED IN: chloroplast; EXPRESSED IN: 21 plant structures; EXPRESSED DURING: 11 growth stages; CONTAINS InterPro DOMAIN/s: Protein of unknown function DUF584 (InterPro:IPR007608); BEST Arabidopsis thaliana protein match is: Protein of unknown function, DUF584 (TAIR:AT1G61930.1)	Senescence regulator S40	NO
AT1G11720	-0.515297	6.34166	3.88142e-08	8.65762e-07	DOWN	starch synthase 3	starch synthase 3 (SS3); CONTAINS InterPro DOMAIN/s: Glycogen/starch synthases, ADP-glucose type (InterPro:IPR011835), Starch synthase, catalytic domain (InterPro:IPR013534), Glycosyl transferase, group 1 (InterPro:IPR001296), Carbohydrate binding domain, family 25 (InterPro:IPR005085); FUNCTIONS IN: starch synthase activity, transferase activity, transferring glycosyl groups; BEST Arabidopsis th…	Carbohydrate binding module family 25 | Glycogen/starch synthase, ADP-glucose type | Glycosyl transferase, family 1 | Starch synthase, catalytic domain	NO
AT1G11740	1.72484	-0.727051	0.000181468	0.0016417	UP	ankyrin repeat family protein	ankyrin repeat family protein; CONTAINS InterPro DOMAIN/s: Ankyrin repeat-containing domain (InterPro:IPR020683), Protein of unknown function DUF3424 (InterPro:IPR021832), Ankyrin repeat (InterPro:IPR002110); BEST Arabidopsis thaliana protein match is: Ankyrin repeat family protein (TAIR:AT1G62050.1)	Ankyrin repeat | Ankyrin repeat domain-containing protein 13 | Ankyrin repeat-containing domain	NO
AT1G11750	-0.256032	6.71078	0.00433251	0.023973	DOWN	CLP protease proteolytic subunit 6	CLP protease proteolytic subunit 6 (CLPP6); FUNCTIONS IN: serine-type endopeptidase activity; INVOLVED IN: chloroplast organization, photosynthesis; LOCATED IN: chloroplastic endopeptidase Clp complex, chloroplast stroma, chloroplast thylakoid; LOCATED IN: in 6 components; EXPRESSED IN: 23 plant structures; EXPRESSED DURING: 13 growth stages; EXPRESSED DURING: 14 growth stages; CONTAINS InterPro …	ATP-dependent Clp protease proteolytic subunit | Clp protease proteolytic subunit /Translocation-enhancing protein TepA | ClpP, active site | ClpP/crotonase-like domain	NO
AT1G11860	-0.409703	9.7383	1.02185e-05	0.000134494	DOWN	Glycine cleavage T-protein family	Glycine cleavage T-protein family; FUNCTIONS IN: aminomethyltransferase activity; EXPRESSED IN: 23 plant structures; INVOLVED IN: response to cadmium ion; EXPRESSED DURING: 14 growth stages; LOCATED IN: in 6 components; CONTAINS InterPro DOMAIN/s: Glycine cleavage system T protein (InterPro:IPR006223), Glycine cleavage T-protein, N-terminal (InterPro:IPR006222), Glycine cleavage T-protein, C-term…	Aminomethyltransferase/Dimethylsulfonioproprionate demethylase DmdA | GTP-binding protein TrmE/Glycine cleavage system T protein, domain 1 | Glycine cleavage T-protein, C-terminal barrel domain | Glycine cleavage T-protein, N-terminal | Glycine cleavage T-protein/YgfZ, C-terminal domain | Glycine cleavage system T protein	NO
AT1G11870	-0.596001	4.86135	1.21493e-08	3.02888e-07	DOWN	Seryl-tRNA synthetase	Seryl-tRNA synthetase (SRS); FUNCTIONS IN: serine-tRNA ligase activity; INVOLVED IN: chloroplast organization, mitochondrion organization, seryl-tRNA aminoacylation, tRNA aminoacylation, ovule development; LOCATED IN: mitochondrion, chloroplast; EXPRESSED IN: 22 plant structures; EXPRESSED DURING: 13 growth stages; CONTAINS InterPro DOMAIN/s: tRNA-binding arm (InterPro:IPR010978), Aminoacyl-tRNA …	Aminoacyl-tRNA synthetase, class II | Aminoacyl-tRNA synthetase, class II (G/ H/ P/ S), conserved domain | Serine-tRNA ligase, type1 | Serine-tRNA synthetase, type1, N-terminal | Ubiquitin-like | tRNA-binding arm	YES	1:4006326:G-A;exonic_variant,1:4006326:G-A;protein_coding;stop-gain;TGG>TGA;W>*,1:4006326:G-A;protein_coding;missense;GGA>AGA;G>R
AT1G11940	-0.484605	2.49795	0.00432748	0.023949	DOWN	Core-2/I-branching beta-1,6-N-acetylglucosaminyltransferase family protein	Core-2/I-branching beta-1,6-N-acetylglucosaminyltransferase family protein; CONTAINS InterPro DOMAIN/s: Core-2/I-Branching enzyme (InterPro:IPR021141); BEST Arabidopsis thaliana protein match is: Core-2/I-branching beta-1,6-N-acetylglucosaminyltransferase family protein (TAIR:AT1G62305.1)	Glycosyl transferase, family 14	YES	1:4032409:G-A;exonic_variant,1:4032409:G-A;intronic_variant
AT1G12020	0.475954	2.9218	0.00192099	0.0121893	UP		unknown protein; BEST Arabidopsis thaliana protein match is: unknown protein (TAIR:AT1G62422.1)		NO
AT1G12050	0.300074	6.1522	0.0016561	0.0107723	UP	fumarylacetoacetase, putative	fumarylacetoacetase, putative; FUNCTIONS IN: fumarylacetoacetase activity, catalytic activity; INVOLVED IN: aromatic amino acid family metabolic process, metabolic process; LOCATED IN: cellular_component unknown; EXPRESSED IN: 23 plant structures; EXPRESSED DURING: 13 growth stages; CONTAINS InterPro DOMAIN/s: Fumarylacetoacetase, C-terminal-like (InterPro:IPR002529), Fumarylacetoacetase, C-termi…		NO
AT1G12080	0.96515	3.91631	5.47386e-05	0.000587899	UP	Vacuolar calcium-binding protein-related	Vacuolar calcium-binding protein-related; BEST Arabidopsis thaliana protein match is: Vacuolar calcium-binding protein-related (TAIR:AT1G62480.1)		NO
AT1G12090	0.37707	10.3014	0.000594237	0.00453432	UP	extensin-like protein	extensin-like protein (ELP); FUNCTIONS IN: lipid binding; INVOLVED IN: lipid transport; LOCATED IN: endomembrane system; EXPRESSED IN: 22 plant structures; EXPRESSED DURING: 13 growth stages; CONTAINS InterPro DOMAIN/s: Bifunctional inhibitor/plant lipid transfer protein/seed storage (InterPro:IPR016140), Plant lipid transfer protein/seed storage/trypsin-alpha amylase inhibitor (InterPro:IPR00361…	Bifunctional inhibitor/plant lipid transfer protein/seed storage helical domain	NO
AT1G12120	0.39267	6.16744	6.20959e-05	0.000653579	UP	Plant protein of unknown function (DUF863)	Plant protein of unknown function (DUF863); CONTAINS InterPro DOMAIN/s: Protein of unknown function DUF863, plant (InterPro:IPR008581); BEST Arabidopsis thaliana protein match is: Plant protein of unknown function (DUF863) (TAIR:AT1G62530.2)	Protein of unknown function DUF863, plant	NO
AT1G12140	0.311194	4.96137	0.00259436	0.0156316	UP	flavin-monooxygenase glucosinolate S-oxygenase 5	flavin-monooxygenase glucosinolate S-oxygenase 5 (FMO GS-OX5); CONTAINS InterPro DOMAIN/s: Flavin-containing monooxygenase FMO (InterPro:IPR000960), Flavin-containing monooxygenase-like (InterPro:IPR020946); FUNCTIONS IN: monooxygenase activity, 8-methylthiopropyl glucosinolate S-oxygenase activity, flavin-containing monooxygenase activity; BEST Arabidopsis thaliana protein match is: flavin-monoo…	Flavin monooxygenase FMO | Flavin monooxygenase-like	NO
AT1G12210	-1.08949	1.36124	2.3994e-06	3.66338e-05	DOWN	RPS5-like 1	RPS5-like 1 (RFL1); FUNCTIONS IN: ATP binding; INVOLVED IN: N-terminal protein myristoylation, response to bacterium, defense response; LOCATED IN: cellular_component unknown; EXPRESSED IN: shoot apex, stem, embryo, sepal, stamen; EXPRESSED DURING: 4 anthesis, petal differentiation and expansion stage, D bilateral stage; CONTAINS InterPro DOMAIN/s: NB-ARC (InterPro:IPR002182), Disease resistance …	Leucine-rich repeat | NB-ARC | P-loop containing nucleoside triphosphate hydrolase	NO
AT1G12240	1.37705	8.28089	2.2718e-21	3.60927e-19	UP	Glycosyl hydrolases family 32 protein	ATBETAFRUCT4; FUNCTIONS IN: hydrolase activity, hydrolyzing O-glycosyl compounds, beta-fructofuranosidase activity; INVOLVED IN: sucrose catabolic process, using beta-fructofuranosidase, carbohydrate metabolic process; LOCATED IN: vacuole, plant-type cell wall; EXPRESSED IN: 25 plant structures; EXPRESSED DURING: 16 growth stages; CONTAINS InterPro DOMAIN/s: Protein of unknown function DUF3357 (I…	Beta-fructofuranosidase | Concanavalin A-like lectin/glucanases superfamily | Glycoside hydrolase, family 32 | Glycoside hydrolase, family 32, active site | Glycosyl hydrolase family 32, C-terminal | Glycosyl hydrolase family 32, N-terminal | Glycosyl hydrolase, five-bladed beta-propellor domain	NO
AT1G12250	-0.49407	6.26649	5.21874e-07	9.20914e-06	DOWN	Pentapeptide repeat-containing protein	Pentapeptide repeat-containing protein; FUNCTIONS IN: molecular_function unknown; INVOLVED IN: biological_process unknown; LOCATED IN: chloroplast thylakoid membrane, chloroplast thylakoid lumen, chloroplast; LOCATED IN: thylakoid, chloroplast thylakoid membrane, chloroplast thylakoid lumen, chloroplast; EXPRESSED IN: 22 plant structures; EXPRESSED DURING: 13 growth stages; CONTAINS InterPro DOMA…	Pentapeptide repeat	NO
AT1G12270	0.412453	5.34087	2.22392e-05	0.000267418	UP	stress-inducible protein, putative	stress-inducible protein, putative; FUNCTIONS IN: binding; INVOLVED IN: response to stress; EXPRESSED IN: 23 plant structures; EXPRESSED DURING: 14 growth stages; CONTAINS InterPro DOMAIN/s: Heat shock chaperonin-binding (InterPro:IPR006636), Tetratricopeptide TPR-1 (InterPro:IPR001440), Tetratricopeptide-like helical (InterPro:IPR011990), Tetratricopeptide repeat-containing (InterPro:IPR013026),…	Heat shock chaperonin-binding | Tetratricopeptide TPR1 | Tetratricopeptide repeat | Tetratricopeptide repeat-containing domain | Tetratricopeptide-like helical domain	NO
AT1G12290	-0.525063	2.20204	0.00312561	0.0183021	DOWN	Disease resistance protein (CC-NBS-LRR class) family	Disease resistance protein (CC-NBS-LRR class) family; FUNCTIONS IN: ATP binding; INVOLVED IN: N-terminal protein myristoylation, defense response; EXPRESSED IN: stem, inflorescence meristem, root, stamen; EXPRESSED DURING: 4 anthesis; CONTAINS InterPro DOMAIN/s: NB-ARC (InterPro:IPR002182), Disease resistance protein (InterPro:IPR000767); BEST Arabidopsis thaliana protein match is: Disease resist…	Leucine-rich repeat | NB-ARC | P-loop containing nucleoside triphosphate hydrolase	YES	1:4182469:G-A;exonic_variant
AT1G12310	0.350017	5.42367	0.00035016	0.00289133	UP	Calcium-binding EF-hand family protein	Calcium-binding EF-hand family protein; FUNCTIONS IN: calcium ion binding; INVOLVED IN: biological_process unknown; LOCATED IN: plasma membrane, nucleus, cytoplasm; EXPRESSED IN: 26 plant structures; EXPRESSED DURING: 15 growth stages; CONTAINS InterPro DOMAIN/s: EF-Hand 1, calcium-binding site (InterPro:IPR018247), EF-HAND 2 (InterPro:IPR018249), EF-hand-like domain (InterPro:IPR011992), Calcium…	EF-Hand 1, calcium-binding site | EF-hand domain | EF-hand domain pair	NO
AT1G12320	-1.09661	1.00028	9.73108e-07	1.62254e-05	DOWN	Protein of unknown function (DUF1442)	Protein of unknown function (DUF1442); CONTAINS InterPro DOMAIN/s: Protein of unknown function DUF1442 (InterPro:IPR009902); BEST Arabidopsis thaliana protein match is: Protein of unknown function (DUF1442) (TAIR:AT1G62840.1)	Protein of unknown function DUF1442	NO
AT1G12450	1.13326	3.54269	1.486e-08	3.64e-07	UP	SNARE associated Golgi protein family	SNARE associated Golgi protein family; CONTAINS InterPro DOMAIN/s: SNARE associated Golgi protein (InterPro:IPR015414); BEST Arabidopsis thaliana protein match is: SNARE associated Golgi protein family (TAIR:AT4G22850.1)	SNARE associated Golgi protein	NO
AT1G12560	1.05855	1.92521	0.000183894	0.00165972	UP	expansin A7	expansin A7 (EXPA7); INVOLVED IN: plant-type cell wall modification involved in multidimensional cell growth, unidimensional cell growth, plant-type cell wall loosening; LOCATED IN: endomembrane system, extracellular region; EXPRESSED IN: sperm cell, root hair, root; CONTAINS InterPro DOMAIN/s: Barwin-related endoglucanase (InterPro:IPR009009), Pollen allergen, N-terminal (InterPro:IPR014734), Ex…	Barwin-like endoglucanase | Expansin | Expansin, cellulose-binding-like domain | Expansin/Lol pI | Expansin/pollen allergen, DPBB domain | RlpA-like double-psi beta-barrel domain	NO
AT1G12580	0.512526	5.72654	5.51382e-08	1.18969e-06	UP	phosphoenolpyruvate carboxylase-related kinase 1	phosphoenolpyruvate carboxylase-related kinase 1 (PEPKR1); FUNCTIONS IN: protein serine/threonine kinase activity, protein kinase activity, kinase activity, ATP binding; INVOLVED IN: protein amino acid phosphorylation; LOCATED IN: cellular_component unknown; EXPRESSED IN: 22 plant structures; EXPRESSED DURING: 13 growth stages; CONTAINS InterPro DOMAIN/s: Protein kinase, ATP binding site (InterPr…	Protein kinase domain | Protein kinase, ATP binding site | Protein kinase-like domain | Serine/threonine-protein kinase, active site | Serine/threonine/dual specificity protein kinase, catalytic domain	NO
AT1G12620	-0.772317	2.56098	3.38316e-05	0.000387053	DOWN	Pentatricopeptide repeat (PPR) superfamily protein	Pentatricopeptide repeat (PPR) superfamily protein; CONTAINS InterPro DOMAIN/s: Pentatricopeptide repeat (InterPro:IPR002885); BEST Arabidopsis thaliana protein match is: Tetratricopeptide repeat (TPR)-like superfamily protein (TAIR:AT1G12300.1)	Pentatricopeptide repeat | Tetratricopeptide-like helical domain	NO
AT1G12650	0.337059	4.42454	0.00350033	0.0200808	UP		unknown protein; FUNCTIONS IN: molecular_function unknown; INVOLVED IN: biological_process unknown; LOCATED IN: cellular_component unknown; EXPRESSED IN: 23 plant structures; EXPRESSED DURING: 13 growth stages; CONTAINS InterPro DOMAIN/s: Protein of unknown function DUF947 (InterPro:IPR009292)	Protein of unknown function DUF947	NO
AT1G12710	1.66084	3.60725	6.81787e-13	3.37695e-11	UP	phloem protein 2-A12	phloem protein 2-A12 (PP2-A12); CONTAINS InterPro DOMAIN/s: F-box domain, cyclin-like (InterPro:IPR001810); BEST Arabidopsis thaliana protein match is: phloem protein 2-A11 (TAIR:AT1G63090.1)	F-box domain | Phloem protein 2-like	NO
AT1G12730	0.772358	3.20337	2.48551e-07	4.69778e-06	UP	GPI transamidase subunit PIG-U	GPI transamidase subunit PIG-U; FUNCTIONS IN: molecular_function unknown; INVOLVED IN: GPI anchor biosynthetic process; LOCATED IN: integral to membrane, endoplasmic reticulum membrane; EXPRESSED IN: 22 plant structures; EXPRESSED DURING: 13 growth stages; CONTAINS InterPro DOMAIN/s: GPI transamidase subunit PIG-U (InterPro:IPR009600); BEST Arabidopsis thaliana protein match is: GPI transamidase …	GPI transamidase subunit PIG-U	NO
AT1G12750	-0.561526	3.85723	0.00060874	0.00462299	DOWN	RHOMBOID-like protein 6	RHOMBOID-like protein 6 (RBL6); FUNCTIONS IN: serine-type endopeptidase activity; INVOLVED IN: biological_process unknown; LOCATED IN: integral to membrane; EXPRESSED IN: 23 plant structures; EXPRESSED DURING: 15 growth stages; CONTAINS InterPro DOMAIN/s: Peptidase S54, rhomboid (InterPro:IPR002610); BEST Arabidopsis thaliana protein match is: RHOMBOID-like 2 (TAIR:AT1G63120.1)	Peptidase S54, rhomboid | Peptidase S54, rhomboid domain	NO
AT1G12760	0.337595	5.75093	0.000252757	0.00218734	UP	Zinc finger, C3HC4 type (RING finger) family protein	Zinc finger, C3HC4 type (RING finger) family protein; CONTAINS InterPro DOMAIN/s: Zinc finger, RING-type (InterPro:IPR001841), Zinc finger, C3HC4 RING-type (InterPro:IPR018957); FUNCTIONS IN: ubiquitin-protein ligase activity, zinc ion binding; BEST Arabidopsis thaliana protein match is: Zinc finger, C3HC4 type (RING finger) family protein (TAIR:AT1G63170.1); LOCATED IN: chloroplast	Zinc finger, RING-type | Zinc finger, RING/FYVE/PHD-type	NO
AT1G12770	0.28137	5.78295	0.00353661	0.0202614	UP	P-loop containing nucleoside triphosphate hydrolases superfamily protein	embryo defective 1586 (EMB1586); FUNCTIONS IN: RNA helicase activity; INVOLVED IN: plasmodesma organization, plasmodesmata-mediated intercellular transport, embryo development ending in seed dormancy; LOCATED IN: mitochondrion; EXPRESSED IN: embryo, root, flower, shoot meristem; CONTAINS InterPro DOMAIN/s: RNA helicase, DEAD-box type, Q motif (InterPro:IPR014014), DNA/RNA helicase, DEAD/DEAH box …	DEAD/DEAH box helicase domain | Helicase, C-terminal | Helicase, superfamily 1/2, ATP-binding domain | P-loop containing nucleoside triphosphate hydrolase | RNA helicase, DEAD-box type, Q motif	NO
AT1G12775	-0.633197	1.61793	0.00459301	0.0251663	DOWN	Pentatricopeptide repeat (PPR) superfamily protein	Pentatricopeptide repeat (PPR) superfamily protein; LOCATED IN: mitochondrion; EXPRESSED IN: 7 plant structures; EXPRESSED DURING: F mature embryo stage, petal differentiation and expansion stage, E expanded cotyledon stage, D bilateral stage; CONTAINS InterPro DOMAIN/s: Pentatricopeptide repeat (InterPro:IPR002885); BEST Arabidopsis thaliana protein match is: Tetratricopeptide repeat (TPR)-like …	Pentatricopeptide repeat | Tetratricopeptide-like helical domain	NO
AT1G12780	1.20456	7.43356	1.60974e-17	1.52296e-15	UP	UDP-D-glucose/UDP-D-galactose 4-epimerase 1	UDP-D-glucose/UDP-D-galactose 4-epimerase 1 (UGE1); FUNCTIONS IN: UDP-glucose 4-epimerase activity, protein dimerization activity; INVOLVED IN: response to stress, galactose biosynthetic process; LOCATED IN: cytosol, plasma membrane; EXPRESSED IN: 32 plant structures; EXPRESSED DURING: 16 growth stages; CONTAINS InterPro DOMAIN/s: NAD-dependent epimerase/dehydratase (InterPro:IPR001509), NAD(P)-b…	NAD(P)-binding domain | NAD-dependent epimerase/dehydratase, N-terminal domain | Nucleotide sugar epimerase | UDP-glucose 4-epimerase C-terminal domain | UDP-glucose 4-epimerase GalE	NO
AT1G12790	0.521227	3.13779	0.000735677	0.00543265	UP		CONTAINS InterPro DOMAIN/s: RuvA domain 2-like (InterPro:IPR010994)	RuvA domain 2-like	NO
AT1G12800	-0.271286	8.21093	0.00382404	0.0216466	DOWN	Nucleic acid-binding, OB-fold-like protein	Nucleic acid-binding, OB-fold-like protein; FUNCTIONS IN: RNA binding; LOCATED IN: chloroplast; EXPRESSED IN: 22 plant structures; EXPRESSED DURING: 13 growth stages; CONTAINS InterPro DOMAIN/s: Nucleic acid-binding, OB-fold-like (InterPro:IPR016027), Nucleic acid-binding, OB-fold (InterPro:IPR012340), Ribosomal protein S1, RNA-binding domain (InterPro:IPR003029); BEST Arabidopsis thaliana protei…	Nucleic acid-binding, OB-fold | RNA-binding domain, S1 | Ribosomal protein S1, RNA-binding domain	NO
AT1G12810	0.303168	4.26104	0.0104736	0.0495593	UP	proline-rich family protein	proline-rich family protein; BEST Arabidopsis thaliana protein match is: unknown protein (TAIR:AT2G33520.1); EXPRESSED IN: 23 plant structures; EXPRESSED DURING: 14 growth stages		NO
AT1G12830	0.492784	3.89588	5.68306e-05	0.000607461	UP		unknown protein; FUNCTIONS IN: molecular_function unknown; INVOLVED IN: biological_process unknown; LOCATED IN: cellular_component unknown; EXPRESSED IN: 23 plant structures; EXPRESSED DURING: 13 growth stages	Cytochrome b-c1 complex, subunit 6	NO
AT1G12880	0.593324	3.8256	0.00206136	0.0129218	UP	nudix hydrolase homolog 12	nudix hydrolase homolog 12 (NUDT12); FUNCTIONS IN: hydrolase activity; INVOLVED IN: biological_process unknown; EXPRESSED IN: 23 plant structures; EXPRESSED DURING: 15 growth stages; CONTAINS InterPro DOMAIN/s: NUDIX hydrolase domain-like (InterPro:IPR015797), NUDIX hydrolase, conserved site (InterPro:IPR020084), NUDIX hydrolase domain (InterPro:IPR000086); BEST Arabidopsis thaliana protein match…	NUDIX hydrolase domain | NUDIX hydrolase domain-like | NUDIX hydrolase, conserved site	NO
AT1G12900	-0.468784	10.333	4.8467e-07	8.60526e-06	DOWN	glyceraldehyde 3-phosphate dehydrogenase A subunit 2	glyceraldehyde 3-phosphate dehydrogenase A subunit 2 (GAPA-2); FUNCTIONS IN: NAD or NADH binding, glyceraldehyde-3-phosphate dehydrogenase activity; FUNCTIONS IN: glyceraldehyde-3-phosphate dehydrogenase activity; INVOLVED IN: glycolysis; INVOLVED IN: oxidation reduction, glycolysis, glucose metabolic process; EXPRESSED IN: 22 plant structures; LOCATED IN: apoplast, chloroplast stroma, chloroplas…	Glyceraldehyde 3-phosphate dehydrogenase, NAD(P) binding domain | Glyceraldehyde 3-phosphate dehydrogenase, active site | Glyceraldehyde 3-phosphate dehydrogenase, catalytic domain | Glyceraldehyde/Erythrose phosphate dehydrogenase family | NAD(P)-binding domain	NO
AT1G12910	0.551934	5.1344	4.74818e-08	1.0402e-06	UP	Transducin/WD40 repeat-like superfamily protein	ANTHOCYANIN11 (ATAN11); CONTAINS InterPro DOMAIN/s: WD40 repeat-like-containing domain (InterPro:IPR011046), WD40 repeat 2 (InterPro:IPR019782), WD40 repeat, conserved site (InterPro:IPR019775), WD40-repeat-containing domain (InterPro:IPR017986), WD40 repeat (InterPro:IPR001680), WD40/YVTN repeat-like-containing domain (InterPro:IPR015943), WD40 repeat, subgroup (InterPro:IPR019781); BEST Arabido…	WD40 repeat | WD40 repeat, conserved site | WD40-repeat-containing domain | WD40/YVTN repeat-like-containing domain	NO
AT1G12970	0.778607	3.8478	3.17013e-11	1.2147e-09	UP	plant intracellular ras group-related LRR 3	plant intracellular ras group-related LRR 3 (PIRL3); CONTAINS InterPro DOMAIN/s: Leucine-rich repeat, typical subtype (InterPro:IPR003591), Leucine-rich repeat (InterPro:IPR001611); BEST Arabidopsis thaliana protein match is: plant intracellular ras group-related LRR 2 (TAIR:AT3G26500.1)	Leucine rich repeat 4 | Leucine-rich repeat | Leucine-rich repeat, typical subtype	NO
AT1G12980	3.31286	-2.83319	0.00334352	0.019321	UP	Integrase-type DNA-binding superfamily protein	ENHANCER OF SHOOT REGENERATION 1 (ESR1); CONTAINS InterPro DOMAIN/s: DNA-binding, integrase-type (InterPro:IPR016177), Pathogenesis-related transcriptional factor/ERF, DNA-binding (InterPro:IPR001471); BEST Arabidopsis thaliana protein match is: DORNROSCHEN-like (TAIR:AT1G24590.1)	AP2/ERF domain | DNA-binding domain	NO
AT1G12990	1.30704	5.06379	1.22974e-17	1.17334e-15	UP	beta-1,4-N-acetylglucosaminyltransferase family protein	beta-1,4-N-acetylglucosaminyltransferase family protein; FUNCTIONS IN: transferase activity, transferring glycosyl groups, acetylglucosaminyltransferase activity; INVOLVED IN: protein amino acid N-linked glycosylation; LOCATED IN: membrane; EXPRESSED IN: 23 plant structures; EXPRESSED DURING: 13 growth stages; CONTAINS InterPro DOMAIN/s: Glycosyl transferase, family 17 (InterPro:IPR006813); BEST …	Glycosyl transferase, family 17	NO
AT1G13080	-0.783415	5.99302	1.6514e-12	7.74662e-11	DOWN	cytochrome P450, family 71, subfamily B, polypeptide 2	cytochrome P450, family 71, subfamily B, polypeptide 2 (CYP71B2); FUNCTIONS IN: electron carrier activity, monooxygenase activity, iron ion binding, oxygen binding, heme binding; INVOLVED IN: response to cyclopentenone, heat acclimation; EXPRESSED IN: 24 plant structures; EXPRESSED DURING: 13 growth stages; CONTAINS InterPro DOMAIN/s: Cytochrome P450 (InterPro:IPR001128), Cytochrome P450, E-class…	Cytochrome P450 | Cytochrome P450, E-class, group I | Cytochrome P450, conserved site	NO
AT1G13110	0.427658	6.10701	0.00139433	0.0092921	UP	cytochrome P450, family 71 subfamily B, polypeptide 7	cytochrome P450, family 71 subfamily B, polypeptide 7 (CYP71B7); FUNCTIONS IN: electron carrier activity, monooxygenase activity, iron ion binding, oxygen binding, heme binding; INVOLVED IN: oxidation reduction; EXPRESSED IN: 22 plant structures; EXPRESSED DURING: 13 growth stages; CONTAINS InterPro DOMAIN/s: Cytochrome P450 (InterPro:IPR001128), Cytochrome P450, E-class, group I (InterPro:IPR002…	Cytochrome P450 | Cytochrome P450, E-class, group I | Cytochrome P450, conserved site	NO
AT1G13160	0.484855	4.19673	0.000303766	0.00255907	UP	ARM repeat superfamily protein	ARM repeat superfamily protein; FUNCTIONS IN: binding; INVOLVED IN: biological_process unknown; LOCATED IN: cellular_component unknown; EXPRESSED IN: 20 plant structures; EXPRESSED DURING: 13 growth stages; CONTAINS InterPro DOMAIN/s: Domain of unknown function, nucleolar NUC130/133, N-terminal (InterPro:IPR012977), Armadillo-type fold (InterPro:IPR016024), SDA1 (InterPro:IPR007949); BEST Arabido…	Armadillo-type fold | SDA1 domain | Sda1 | Uncharacterised domain NUC130/133, N-terminal	NO
AT1G13270	0.397419	4.57997	0.00162682	0.0106101	UP	methionine aminopeptidase 1B	methionine aminopeptidase 1B (MAP1C); FUNCTIONS IN: metalloexopeptidase activity, aminopeptidase activity; INVOLVED IN: proteolysis, N-terminal protein amino acid modification; LOCATED IN: mitochondrion, chloroplast; EXPRESSED IN: 22 plant structures; EXPRESSED DURING: 13 growth stages; CONTAINS InterPro DOMAIN/s: Peptidase M24, structural domain (InterPro:IPR000994), Peptidase M24A, methionine a…	Peptidase M24, methionine aminopeptidase | Peptidase M24, structural domain | Peptidase M24A, methionine aminopeptidase, subfamily 1	NO
AT1G13280	-0.471064	4.6226	0.000818786	0.00595241	DOWN	allene oxide cyclase 4	allene oxide cyclase 4 (AOC4); FUNCTIONS IN: allene-oxide cyclase activity; INVOLVED IN: jasmonic acid biosynthetic process; LOCATED IN: plasma membrane, chloroplast; EXPRESSED IN: 24 plant structures; EXPRESSED DURING: 13 growth stages; CONTAINS InterPro DOMAIN/s: Allene oxide cyclase (InterPro:IPR009410); BEST Arabidopsis thaliana protein match is: allene oxide cyclase 3 (TAIR:AT3G25780.1)	Allene oxide cyclase	NO
AT1G13300	0.630431	3.27124	0.00408546	0.022831	UP	myb-like transcription factor family protein	HYPERSENSITIVITY TO LOW PI-ELICITED PRIMARY ROOT SHORTENING 1 (HRS1); CONTAINS InterPro DOMAIN/s: Homeodomain-like (InterPro:IPR009057), Myb, DNA-binding (InterPro:IPR014778), HTH transcriptional regulator, Myb-type, DNA-binding (InterPro:IPR017930), Myb-like DNA-binding domain, SHAQKYF class (InterPro:IPR006447), Homeodomain-related (InterPro:IPR012287); BEST Arabidopsis thaliana protein match i…	Homeodomain-like | Myb domain | Myb domain, plants | SANT/Myb domain	NO
AT1G13350	-0.44626	5.54009	1.44807e-05	0.0001826	DOWN	Protein kinase superfamily protein	Protein kinase superfamily protein; FUNCTIONS IN: protein serine/threonine kinase activity, protein kinase activity, ATP binding; INVOLVED IN: protein amino acid phosphorylation; LOCATED IN: nucleus, cytoplasm; EXPRESSED IN: male gametophyte, cultured cell, pollen tube; EXPRESSED IN: male gametophyte, pollen tube; EXPRESSED DURING: L mature pollen stage, M germinated pollen stage; CONTAINS InterP…	Protein kinase domain | Protein kinase-like domain | Serine/threonine-protein kinase, active site | Serine/threonine/dual specificity protein kinase, catalytic domain	NO
AT1G13360	-1.25681	6.27817	1.59124e-18	1.80453e-16	DOWN		unknown protein; FUNCTIONS IN: molecular_function unknown; INVOLVED IN: biological_process unknown; LOCATED IN: cellular_component unknown; BEST Arabidopsis thaliana protein match is: unknown protein (TAIR:AT3G25870.1)		NO
AT1G13420	1.28882	1.37635	0.000437863	0.00349968	UP	sulfotransferase 4B	sulfotransferase 4B (ST4B); CONTAINS InterPro DOMAIN/s: Sulfotransferase domain (InterPro:IPR000863); BEST Arabidopsis thaliana protein match is: sulfotransferase 4A (TAIR:AT2G14920.1)	P-loop containing nucleoside triphosphate hydrolase | Sulfotransferase domain	NO
AT1G13460	-0.569304	4.10298	1.3823e-06	2.2394e-05	DOWN	Protein phosphatase 2A regulatory B subunit family protein	Protein phosphatase 2A regulatory B subunit family protein; FUNCTIONS IN: protein phosphatase type 2A regulator activity; INVOLVED IN: signal transduction; LOCATED IN: peroxisome, protein phosphatase type 2A complex; EXPRESSED IN: 21 plant structures; EXPRESSED DURING: 12 growth stages; CONTAINS InterPro DOMAIN/s: Protein phosphatase 2A, regulatory B subunit, B56 (InterPro:IPR002554); BEST Arabid…	Armadillo-type fold | Protein phosphatase 2A, regulatory B subunit, B56	NO
AT1G13530	2.19254	1.71793	7.28606e-14	4.1735e-12	UP	Protein of unknown function (DUF1262)	Protein of unknown function (DUF1262); CONTAINS InterPro DOMAIN/s: Protein of unknown function DUF1262 (InterPro:IPR010683); BEST Arabidopsis thaliana protein match is: Protein of unknown function (DUF1262) (TAIR:AT1G13500.1)	Protein of unknown function DUF1262	NO
AT1G13650	0.407473	5.46875	0.00239348	0.0146139	UP		BEST Arabidopsis thaliana protein match is: 18S pre-ribosomal assembly protein gar2-related (TAIR:AT2G03810.4)		NO
AT1G13660	-4.7384	-3.576	0.00576233	0.0302307	DOWN	transposable element gene	Mutator-like transposase family, has a 2.6e-36 P-value blast match to GB:AAA21566 mudrA of transposon="MuDR" (MuDr-element) (Zea mays)		NO
AT1G13670	0.947744	3.27036	6.05814e-06	8.4298e-05	UP		unknown protein		NO
AT1G13690	0.339222	4.11617	0.00449955	0.0247387	UP	ATPase E1	ATPase E1 (ATE1); FUNCTIONS IN: nucleotide binding, nucleic acid binding; INVOLVED IN: biological_process unknown; LOCATED IN: cellular_component unknown; EXPRESSED IN: 23 plant structures; EXPRESSED DURING: 13 growth stages; CONTAINS InterPro DOMAIN/s: RNA recognition motif, glycine rich protein (InterPro:IPR015465), RNA recognition motif, RNP-1 (InterPro:IPR000504), Nucleotide-binding, alpha-be…	Nucleotide-binding, alpha-beta plait | RNA recognition motif domain	NO
AT1G13700	1.77073	4.86941	7.97782e-19	9.59647e-17	UP	6-phosphogluconolactonase 1	6-phosphogluconolactonase 1 (PGL1); FUNCTIONS IN: 6-phosphogluconolactonase activity, catalytic activity; INVOLVED IN: pentose-phosphate shunt, carbohydrate metabolic process; LOCATED IN: cellular_component unknown; EXPRESSED IN: 11 plant structures; EXPRESSED DURING: LP.06 six leaves visible, LP.04 four leaves visible, 4 anthesis, petal differentiation and expansion stage; CONTAINS InterPro DOMA…	6-phosphogluconolactonase, DevB-type | Glucosamine/galactosamine-6-phosphate isomerase	NO
AT1G13710	1.06887	0.931365	0.000291869	0.00247806	UP	cytochrome P450, family 78, subfamily A, polypeptide 5	cytochrome P450, family 78, subfamily A, polypeptide 5 (CYP78A5); FUNCTIONS IN: electron carrier activity, monooxygenase activity, iron ion binding, oxygen binding, heme binding; INVOLVED IN: in 7 processes; LOCATED IN: endoplasmic reticulum; EXPRESSED IN: 10 plant structures; EXPRESSED DURING: F mature embryo stage, petal differentiation and expansion stage, E expanded cotyledon stage, D bilater…	Cytochrome P450 | Cytochrome P450, E-class, group I | Cytochrome P450, conserved site	NO
AT1G13770	0.416057	4.25437	0.000613009	0.00464703	UP	Protein of unknown function, DUF647	ROOT UV-B SENSITIVE 3 (RUS3); FUNCTIONS IN: molecular_function unknown; INVOLVED IN: biological_process unknown; LOCATED IN: cellular_component unknown; CONTAINS InterPro DOMAIN/s: Protein of unknown function DUF647 (InterPro:IPR006968); BEST Arabidopsis thaliana protein match is: Protein of unknown function, DUF647 (TAIR:AT3G45890.1)	Vitamin B6 photo-protection and homoeostasis	NO
AT1G13790	0.578753	1.974	0.00106917	0.00746039	UP	XH/XS domain-containing protein	XH/XS domain-containing protein; CONTAINS InterPro DOMAIN/s: Domain of unknown function XS (InterPro:IPR005380), Domain of unknown function XH (InterPro:IPR005379), Domain of unknown function, putative Zinc finger, XS/XH (InterPro:IPR005381); BEST Arabidopsis thaliana protein match is: XH/XS domain-containing protein (TAIR:AT3G48670.2)	Uncharacterised domain XH | XS domain | Zinc finger-XS domain	NO
AT1G13820	-0.88295	5.79585	1.14584e-18	1.3308e-16	DOWN	alpha/beta-Hydrolases superfamily protein	alpha/beta-Hydrolases superfamily protein; FUNCTIONS IN: hydrolase activity, catalytic activity; CONTAINS InterPro DOMAIN/s: Epoxide hydrolase-like (InterPro:IPR000639), Alpha/beta hydrolase fold-1 (InterPro:IPR000073); BEST Arabidopsis thaliana protein match is: alpha/beta-Hydrolases superfamily protein (TAIR:AT5G39220.1)	Alpha/Beta hydrolase fold | Alpha/beta hydrolase fold-1 | Epoxide hydrolase-like	NO
AT1G13870	0.398447	3.65934	0.00782472	0.0388881	UP	calmodulin binding;purine nucleotide binding	DEFORMED ROOTS AND LEAVES 1 (DRL1); CONTAINS InterPro DOMAIN/s: Chromatin associated protein KTI12 (InterPro:IPR013641)	Chromatin associated protein KTI12 | P-loop containing nucleoside triphosphate hydrolase	NO
AT1G13930	-0.347091	9.65867	0.00134621	0.00903584	DOWN		FUNCTIONS IN: molecular_function unknown; INVOLVED IN: response to cadmium ion, response to salt stress; INVOLVED IN: response to salt stress; EXPRESSED IN: 25 plant structures; LOCATED IN: chloroplast, chloroplast stroma, plasma membrane, chloroplast envelope; EXPRESSED DURING: 13 growth stages; EXPRESSED IN: 27 plant structures; BEST Arabidopsis thaliana protein match is: nodulin-related protei…		NO
AT1G13940	0.424196	5.07467	3.67594e-05	0.000416306	UP	Plant protein of unknown function (DUF863)	Plant protein of unknown function (DUF863); CONTAINS InterPro DOMAIN/s: Protein of unknown function DUF863, plant (InterPro:IPR008581); BEST Arabidopsis thaliana protein match is: Plant protein of unknown function (DUF863) (TAIR:AT1G69360.1)	Protein of unknown function DUF863, plant	NO
AT1G13960	0.333051	5.08517	0.00138294	0.00923446	UP	WRKY DNA-binding protein 4	WRKY DNA-binding protein 4 (WRKY4); FUNCTIONS IN: DNA binding, sequence-specific DNA binding transcription factor activity; INVOLVED IN: regulation of transcription, DNA-dependent; LOCATED IN: chloroplast; EXPRESSED IN: 22 plant structures; EXPRESSED DURING: 10 growth stages; CONTAINS InterPro DOMAIN/s: DNA-binding WRKY (InterPro:IPR003657); BEST Arabidopsis thaliana protein match is: WRKY DNA-bi…	DNA-binding WRKY	NO
AT1G14030	-0.455396	5.80521	2.18582e-06	3.36167e-05	DOWN	Rubisco methyltransferase family protein	Rubisco methyltransferase family protein; FUNCTIONS IN: [ribulose-bisphosphate carboxylase]-lysine N-methyltransferase activity; LOCATED IN: chloroplast, chloroplast stroma; EXPRESSED IN: 20 plant structures; EXPRESSED DURING: 13 growth stages; CONTAINS InterPro DOMAIN/s: Rubisco methyltransferase (InterPro:IPR011192), SET domain (InterPro:IPR001214), Rubisco LSMT substrate-binding (InterPro:IPR0…	Rubisco LSMT methyltransferase, plant | Rubisco LSMT, substrate-binding domain | SET domain	NO
AT1G14040	0.432408	2.56173	0.0102851	0.0488251	UP	EXS (ERD1/XPR1/SYG1) family protein	EXS (ERD1/XPR1/SYG1) family protein; LOCATED IN: integral to membrane; EXPRESSED IN: 21 plant structures; EXPRESSED DURING: 12 growth stages; CONTAINS InterPro DOMAIN/s: SPX, N-terminal (InterPro:IPR004331), EXS, C-terminal (InterPro:IPR004342); BEST Arabidopsis thaliana protein match is: EXS (ERD1/XPR1/SYG1) family protein (TAIR:AT2G03240.1)	EXS, C-terminal | SPX, N-terminal	YES	1:4811646:A-AT;exonic_variant,1:4811646:A-AT;intronic_variant
AT1G14060	0.560436	2.49367	0.00541033	0.0287513	UP	GCK domain-containing protein	GCK domain-containing protein; FUNCTIONS IN: molecular_function unknown; INVOLVED IN: N-terminal protein myristoylation; LOCATED IN: cellular_component unknown; EXPRESSED IN: 16 plant structures; EXPRESSED DURING: 10 growth stages; CONTAINS InterPro DOMAIN/s: GCK (InterPro:IPR012891); BEST Arabidopsis thaliana protein match is: GCK domain-containing protein (TAIR:AT5G02210.1)	GCK	NO
AT1G14120	-0.51151	2.84018	0.00909078	0.0440542	DOWN	2-oxoglutarate (2OG) and Fe(II)-dependent oxygenase superfamily protein	2-oxoglutarate (2OG) and Fe(II)-dependent oxygenase superfamily protein; FUNCTIONS IN: oxidoreductase activity, acting on paired donors, with incorporation or reduction of molecular oxygen, 2-oxoglutarate as one donor, and incorporation of one atom each of oxygen into both donors, oxidoreductase activity; INVOLVED IN: biological_process unknown; LOCATED IN: cellular_component unknown; EXPRESSED I…	Isopenicillin N synthase-like | Non-haem dioxygenase N-terminal domain | Oxoglutarate/iron-dependent dioxygenase	NO
AT1G14130	-0.475689	2.58823	0.00394338	0.0221842	DOWN	2-oxoglutarate (2OG) and Fe(II)-dependent oxygenase superfamily protein	2-oxoglutarate (2OG) and Fe(II)-dependent oxygenase superfamily protein; FUNCTIONS IN: oxidoreductase activity, acting on paired donors, with incorporation or reduction of molecular oxygen, 2-oxoglutarate as one donor, and incorporation of one atom each of oxygen into both donors, oxidoreductase activity; INVOLVED IN: biological_process unknown; LOCATED IN: nucleus; EXPRESSED IN: 23 plant structu…	Isopenicillin N synthase-like | Non-haem dioxygenase N-terminal domain | Oxoglutarate/iron-dependent dioxygenase	NO
AT1G14150	-1.02406	5.77945	5.39954e-22	9.18495e-20	DOWN	PsbQ-like 2	PsbQ-like 2 (PQL2); FUNCTIONS IN: electron transporter, transferring electrons within the cyclic electron transport pathway of photosynthesis activity; INVOLVED IN: photosynthetic electron transport chain; LOCATED IN: in 6 components; EXPRESSED IN: 22 plant structures; EXPRESSED DURING: 13 growth stages; CONTAINS InterPro DOMAIN/s: Photosystem II oxygen evolving complex protein PsbQ (InterPro:IPR…		NO
AT1G14160	1.06235	0.611475	2.04308e-05	0.000247796	UP	Uncharacterised protein family (UPF0497)	Uncharacterised protein family (UPF0497); CONTAINS InterPro DOMAIN/s: Uncharacterised protein family UPF0497, trans-membrane plant (InterPro:IPR006702), Uncharacterised protein family UPF0497, trans-membrane plant subgroup (InterPro:IPR006459); BEST Arabidopsis thaliana protein match is: Uncharacterised protein family (UPF0497) (TAIR:AT5G15290.1)	Uncharacterised protein family UPF0497, trans-membrane plant | Uncharacterised protein family UPF0497, trans-membrane plant subgroup	NO
AT1G14185	0.78504	1.19219	0.000215485	0.00190189	UP	Glucose-methanol-choline (GMC) oxidoreductase family protein	Glucose-methanol-choline (GMC) oxidoreductase family protein; FUNCTIONS IN: aldehyde-lyase activity, oxidoreductase activity, acting on CH-OH group of donors, FAD binding; INVOLVED IN: alcohol metabolic process; LOCATED IN: endomembrane system; CONTAINS InterPro DOMAIN/s: Glucose-methanol-choline oxidoreductase, N-terminal (InterPro:IPR000172), Glucose-methanol-choline oxidoreductase (InterPro:IP…	Glucose-methanol-choline oxidoreductase | Glucose-methanol-choline oxidoreductase, C-terminal | Glucose-methanol-choline oxidoreductase, N-terminal	NO
AT1G14220	1.08311	-1.31623	0.00649748	0.0333017	UP	Ribonuclease T2 family protein	Ribonuclease T2 family protein; FUNCTIONS IN: ribonuclease T2 activity, endoribonuclease activity, RNA binding; INVOLVED IN: N-terminal protein myristoylation; LOCATED IN: endomembrane system; EXPRESSED IN: sperm cell, root, egg cell; CONTAINS InterPro DOMAIN/s: Ribonuclease T2 (InterPro:IPR001568), Ribonuclease T2, active site (InterPro:IPR018188); BEST Arabidopsis thaliana protein match is: rib…	Ribonuclease T2, active site | Ribonuclease T2-like	NO
AT1G14250	1.80199	-0.0356903	0.0103194	0.0489531	UP	GDA1/CD39 nucleoside phosphatase family protein	GDA1/CD39 nucleoside phosphatase family protein; FUNCTIONS IN: hydrolase activity; INVOLVED IN: biological_process unknown; LOCATED IN: vacuole; EXPRESSED IN: male gametophyte, cultured cell, pollen tube; EXPRESSED DURING: L mature pollen stage, M germinated pollen stage; CONTAINS InterPro DOMAIN/s: Nucleoside phosphatase GDA1/CD39 (InterPro:IPR000407); BEST Arabidopsis thaliana protein match is:…	Nucleoside phosphatase GDA1/CD39	YES	1:4870090:A-AG;intronic_variant
AT1G14280	1.32494	6.79075	4.6411e-23	8.78185e-21	UP	phytochrome kinase substrate 2	phytochrome kinase substrate 2 (PKS2); BEST Arabidopsis thaliana protein match is: phytochrome kinase substrate 1 (TAIR:AT2G02950.1)		NO
AT1G14290	0.994731	4.54562	3.58971e-13	1.86008e-11	UP	sphingoid base hydroxylase 2	sphingoid base hydroxylase 2 (SBH2); CONTAINS InterPro DOMAIN/s: Fatty acid hydroxylase (InterPro:IPR006694); BEST Arabidopsis thaliana protein match is: sphingoid base hydroxylase 1 (TAIR:AT1G69640.1)	Fatty acid hydroxylase	NO
AT1G14300	0.479488	3.76563	0.00190341	0.0120983	UP	ARM repeat superfamily protein	ARM repeat superfamily protein; FUNCTIONS IN: binding; INVOLVED IN: biological_process unknown; LOCATED IN: cellular_component unknown; EXPRESSED IN: 22 plant structures; EXPRESSED DURING: 13 growth stages; CONTAINS InterPro DOMAIN/s: Uncharacterised protein family UPF0507 (InterPro:IPR007205), Armadillo-like helical (InterPro:IPR011989), Armadillo-type fold (InterPro:IPR016024), Uncharacterised …	Armadillo-like helical | Armadillo-type fold | FAM203 C-terminal | FAM203 N-terminal	YES	1:4882727:G-A;exonic_variant,1:4882727:G-A;splice_acceptor_region_variant
AT1G14330	0.878858	3.78336	1.15614e-05	0.000150115	UP	Galactose oxidase/kelch repeat superfamily protein	Galactose oxidase/kelch repeat superfamily protein; CONTAINS InterPro DOMAIN/s: Galactose oxidase/kelch, beta-propeller (InterPro:IPR011043), Kelch repeat type 1 (InterPro:IPR006652), Kelch related (InterPro:IPR013089), Kelch-type beta propeller (InterPro:IPR015915); BEST Arabidopsis thaliana protein match is: Galactose oxidase/kelch repeat superfamily protein (TAIR:AT2G02870.3)	Galactose oxidase, beta-propeller | Kelch repeat type 1	NO
AT1G14345	-0.659708	6.12301	3.05688e-10	9.95732e-09	DOWN	NAD(P)-linked oxidoreductase superfamily protein	NAD(P)-linked oxidoreductase superfamily protein; FUNCTIONS IN: oxidoreductase activity; INVOLVED IN: oxidation reduction; LOCATED IN: chloroplast thylakoid membrane, chloroplast, membrane; EXPRESSED IN: 21 plant structures; EXPRESSED DURING: 13 growth stages; CONTAINS InterPro DOMAIN/s: Aldo/keto reductase (InterPro:IPR001395)	Domain of unknown function DUF304	NO
AT1G14360	0.586728	4.48541	0.000205782	0.00182971	UP	UDP-galactose transporter 3	UDP-galactose transporter 3 (UTR3); FUNCTIONS IN: pyrimidine nucleotide sugar transmembrane transporter activity; INVOLVED IN: transmembrane transport; LOCATED IN: endomembrane system; EXPRESSED IN: 24 plant structures; EXPRESSED DURING: 15 growth stages; CONTAINS InterPro DOMAIN/s: UAA transporter (InterPro:IPR013657); BEST Arabidopsis thaliana protein match is: UDP-galactose transporter 1 (TAIR…	UAA transporter	NO
AT1G14410	-0.371638	3.96229	0.00261783	0.0157561	DOWN	ssDNA-binding transcriptional regulator	WHIRLY 1 (WHY1); FUNCTIONS IN: DNA binding, telomeric DNA binding; INVOLVED IN: negative regulation of telomere maintenance via telomerase, defense response; LOCATED IN: plastid chromosome, chloroplast, nucleoid, telomerase holoenzyme complex; EXPRESSED IN: 21 plant structures; EXPRESSED DURING: 14 growth stages; CONTAINS InterPro DOMAIN/s: ssDNA-binding transcriptional regulator (InterPro:IPR009…	Plant transcription factor | ssDNA-binding transcriptional regulator	NO
AT1G14440	0.478882	4.28169	0.000596269	0.00454602	UP	homeobox protein 31	homeobox protein 31 (HB31); FUNCTIONS IN: DNA binding, sequence-specific DNA binding transcription factor activity; INVOLVED IN: regulation of transcription; LOCATED IN: cellular_component unknown; EXPRESSED IN: 17 plant structures; EXPRESSED DURING: 11 growth stages; CONTAINS InterPro DOMAIN/s: Homeobox domain, ZF-HD class (InterPro:IPR006455), ZF-HD homeobox protein, Cys/His-rich dimerisation d…	Homeodomain, ZF-HD class | Homeodomain-like | ZF-HD homeobox protein, Cys/His-rich dimerisation domain	NO
AT1G14520	0.660612	3.03502	7.40001e-05	0.000763135	UP	myo-inositol oxygenase 1	myo-inositol oxygenase 1 (MIOX1); FUNCTIONS IN: inositol oxygenase activity, oxidoreductase activity; INVOLVED IN: syncytium formation; LOCATED IN: cytoplasm; EXPRESSED IN: 6 plant structures; CONTAINS InterPro DOMAIN/s: Protein of unknown function DUF706 (InterPro:IPR007828); BEST Arabidopsis thaliana protein match is: myo-inositol oxygenase 2 (TAIR:AT2G19800.1)	Inositol oxygenase	NO
AT1G14530	0.62427	2.67934	0.000127293	0.00121516	UP	Protein of unknown function (DUF1084)	TOM THREE HOMOLOG 1 (THH1); CONTAINS InterPro DOMAIN/s: Protein of unknown function DUF1084 (InterPro:IPR009457); BEST Arabidopsis thaliana protein match is: tobamovirus multiplication protein 3 (TAIR:AT2G02180.1)	Domain of unknown function DUF1084	NO
AT1G14570	0.324693	6.01443	0.000462826	0.00367306	UP	UBX domain-containing protein	UBX domain-containing protein; FUNCTIONS IN: molecular_function unknown; BEST Arabidopsis thaliana protein match is: structural constituent of ribosome (TAIR:AT4G14250.2); INVOLVED IN: biological_process unknown; LOCATED IN: cellular_component unknown; EXPRESSED IN: 24 plant structures; EXPRESSED DURING: 15 growth stages; CONTAINS InterPro DOMAIN/s: UAS (InterPro:IPR006577), Uncharacterised conse…	Thioredoxin-like fold | UAS | UBA-like | UBX domain | Ubiquitin interacting motif | Ubiquitin-related domain | Uncharacterised conserved protein UCP037991, UAS/UBX	NO
AT1G14620	0.565733	3.67486	9.6024e-05	0.000956859	UP	decoy	DECOY (DECOY); FUNCTIONS IN: molecular_function unknown; INVOLVED IN: biological_process unknown; LOCATED IN: cellular_component unknown; EXPRESSED IN: 22 plant structures; EXPRESSED DURING: 13 growth stages; CONTAINS InterPro DOMAIN/s: Ribosomal protein L46 (InterPro:IPR021757)	Ribosomal protein L46	NO
AT1G14640	1.04521	3.06306	2.69702e-11	1.04127e-09	UP	SWAP (Suppressor-of-White-APricot)/surp domain-containing protein	SWAP (Suppressor-of-White-APricot)/surp domain-containing protein; FUNCTIONS IN: RNA binding; INVOLVED IN: RNA processing; EXPRESSED IN: male gametophyte, flower, seed, pollen tube; EXPRESSED DURING: L mature pollen stage, M germinated pollen stage, 4 anthesis, E expanded cotyledon stage; CONTAINS InterPro DOMAIN/s: SWAP/Surp (InterPro:IPR000061), Pre-mRNA splicing factor PRP21 like protein (Inte…	Pre-mRNA splicing factor PRP21-like protein | SWAP/Surp | Ubiquitin-related domain	NO
AT1G14650	0.410109	6.22148	4.00081e-05	0.00044775	UP	SWAP (Suppressor-of-White-APricot)/surp domain-containing protein / ubiquitin family protein	SWAP (Suppressor-of-White-APricot)/surp domain-containing protein / ubiquitin family protein; FUNCTIONS IN: RNA binding; INVOLVED IN: RNA processing; EXPRESSED IN: 24 plant structures; EXPRESSED DURING: 14 growth stages; CONTAINS InterPro DOMAIN/s: SWAP/Surp (InterPro:IPR000061), Ubiquitin (InterPro:IPR000626), Pre-mRNA splicing factor PRP21 like protein (InterPro:IPR022030), Ubiquitin supergroup…	Pre-mRNA splicing factor PRP21-like protein | SWAP/Surp | Ubiquitin-like | Ubiquitin-related domain	NO
AT1G14680	0.616263	0.533814	0.00978595	0.0468317	UP		unknown protein; BEST Arabidopsis thaliana protein match is: unknown protein (TAIR:AT4G09060.1)		NO
AT1G14685	0.367164	5.38558	0.000148517	0.00138527	UP	basic pentacysteine 2	basic pentacysteine 2 (BPC2); CONTAINS InterPro DOMAIN/s: GAGA binding-like (InterPro:IPR010409); BEST Arabidopsis thaliana protein match is: basic pentacysteine1 (TAIR:AT2G01930.2)	GAGA-binding transcriptional activator	NO
AT1G14687	0.869769	0.842114	5.60868e-05	0.000600846	UP	homeobox protein 32	homeobox protein 32 (HB32); FUNCTIONS IN: DNA binding, sequence-specific DNA binding transcription factor activity; INVOLVED IN: regulation of transcription; EXPRESSED IN: 8 plant structures; EXPRESSED DURING: F mature embryo stage, petal differentiation and expansion stage, E expanded cotyledon stage, D bilateral stage; CONTAINS InterPro DOMAIN/s: Homeobox domain, ZF-HD class (InterPro:IPR006455…	Homeodomain, ZF-HD class | Homeodomain-like | ZF-HD homeobox protein, Cys/His-rich dimerisation domain	NO
AT1G14690	0.457915	5.52983	2.87473e-05	0.000336811	UP	microtubule-associated protein 65-7	microtubule-associated protein 65-7 (MAP65-7); FUNCTIONS IN: molecular_function unknown; INVOLVED IN: biological_process unknown; LOCATED IN: cellular_component unknown; CONTAINS InterPro DOMAIN/s: Microtubule-associated protein, MAP65/ASE1-type (InterPro:IPR007145); BEST Arabidopsis thaliana protein match is: Microtubule associated protein (MAP65/ASE1) family protein (TAIR:AT2G01910.1)	Microtubule-associated protein, MAP65/Ase1/PRC1	NO
AT1G14710	0.43312	5.79735	6.9992e-06	9.62259e-05	UP	hydroxyproline-rich glycoprotein family protein	hydroxyproline-rich glycoprotein family protein; BEST Arabidopsis thaliana protein match is: oxidoreductase, 2OG-Fe(II) oxygenase family protein (TAIR:AT4G02940.1)	Alpha-ketoglutarate-dependent dioxygenase AlkB-like	NO
AT1G14720	0.388406	6.11031	5.5135e-05	0.000591779	UP	xyloglucan endotransglucosylase/hydrolase 28	xyloglucan endotransglucosylase/hydrolase 28 (XTH28); FUNCTIONS IN: hydrolase activity, acting on glycosyl bonds, xyloglucan:xyloglucosyl transferase activity; INVOLVED IN: fruit development, stamen filament development; LOCATED IN: endomembrane system, cell wall, apoplast; EXPRESSED IN: 22 plant structures; EXPRESSED DURING: 13 growth stages; CONTAINS InterPro DOMAIN/s: Xyloglucan endotransgluco…	Concanavalin A-like lectin/glucanase, subgroup | Concanavalin A-like lectin/glucanases superfamily | Glycoside hydrolase, family 16 | Xyloglucan endo-transglycosylase, C-terminal | Xyloglucan endotransglucosylase/hydrolase	NO
AT1G14740	0.611015	6.46725	1.25782e-10	4.4176e-09	UP	Protein of unknown function (DUF1423)	Protein of unknown function (DUF1423); CONTAINS InterPro DOMAIN/s: Protein of unknown function DUF1423, plant (InterPro:IPR004082); BEST Arabidopsis thaliana protein match is: Protein of unknown function (DUF1423) (TAIR:AT3G63500.1)	Protein OBERON	NO
AT1G14840	-0.30846	5.02713	0.00588533	0.0307324	DOWN	microtubule-associated proteins 70-4	microtubule-associated proteins 70-4 (MAP70-4); FUNCTIONS IN: microtubule binding; INVOLVED IN: cytoskeleton organization; LOCATED IN: microtubule; LOCATED IN: microtubule, plasma membrane; EXPRESSED IN: 18 plant structures; EXPRESSED DURING: 11 growth stages; CONTAINS InterPro DOMAIN/s: Myosin II heavy chain-like (InterPro:IPR009768); BEST Arabidopsis thaliana protein match is: microtubule-assoc…	Microtubule-associated protein 70	NO
AT1G14850	0.348175	4.96892	0.00113832	0.00785331	UP	nucleoporin 155	nucleoporin 155 (NUP155); FUNCTIONS IN: nucleocytoplasmic transporter activity; INVOLVED IN: nucleocytoplasmic transport; LOCATED IN: nucleolus, plasma membrane, chloroplast, nuclear pore; EXPRESSED IN: 25 plant structures; EXPRESSED DURING: 13 growth stages; CONTAINS InterPro DOMAIN/s: Nucleoporin, Nup133/Nup155-like, N-terminal (InterPro:IPR014908), Nucleoporin, Nup155-like (InterPro:IPR004870)…	Nucleoporin, Nup133/Nup155-like, C-terminal | Nucleoporin, Nup133/Nup155-like, N-terminal | Nucleoporin, Nup155-like	NO
AT1G14860	0.644978	2.48726	0.00174253	0.011224	UP	nudix hydrolase homolog 18	nudix hydrolase homolog 18 (NUDT18); FUNCTIONS IN: hydrolase activity; INVOLVED IN: biological_process unknown; CONTAINS InterPro DOMAIN/s: NUDIX hydrolase domain-like (InterPro:IPR015797), NUDIX hydrolase, conserved site (InterPro:IPR020084), NUDIX hydrolase domain (InterPro:IPR000086); BEST Arabidopsis thaliana protein match is: nudix hydrolase homolog 17 (TAIR:AT2G01670.1)	NUDIX hydrolase domain | NUDIX hydrolase domain-like | NUDIX hydrolase, conserved site	NO
AT1G14890	0.572654	6.52971	0.000680249	0.00509031	UP	Plant invertase/pectin methylesterase inhibitor superfamily protein	Plant invertase/pectin methylesterase inhibitor superfamily protein; FUNCTIONS IN: enzyme inhibitor activity, pectinesterase inhibitor activity, pectinesterase activity; INVOLVED IN: biological_process unknown; EXPRESSED IN: 22 plant structures; EXPRESSED DURING: 13 growth stages; CONTAINS InterPro DOMAIN/s: Pectinesterase inhibitor (InterPro:IPR006501); BEST Arabidopsis thaliana protein match is…	Pectinesterase inhibitor domain	NO
AT1G14910	0.468205	5.39187	3.02845e-06	4.50934e-05	UP	ENTH/ANTH/VHS superfamily protein	ENTH/ANTH/VHS superfamily protein; FUNCTIONS IN: phospholipid binding, clathrin binding, binding, phosphatidylinositol binding; INVOLVED IN: N-terminal protein myristoylation, clathrin coat assembly; LOCATED IN: clathrin coat, mitochondrion; EXPRESSED IN: 23 plant structures; EXPRESSED DURING: 14 growth stages; CONTAINS InterPro DOMAIN/s: Epsin-like, N-terminal (InterPro:IPR013809), ANTH (InterPr…	AP180 N-terminal homology (ANTH) domain | Clathrin adaptor, phosphoinositide-binding, GAT-like | ENTH/VHS | Epsin-like, N-terminal	NO
AT1G14920	0.586284	5.72978	1.91781e-08	4.56171e-07	UP	GRAS family transcription factor family protein	GIBBERELLIC ACID INSENSITIVE (GAI); CONTAINS InterPro DOMAIN/s: Transcriptional factor DELLA, N-terminal (InterPro:IPR021914), Transcription factor GRAS (InterPro:IPR005202); BEST Arabidopsis thaliana protein match is: GRAS family transcription factor family protein (TAIR:AT2G01570.1)	Transcription factor GRAS | Transcriptional factor DELLA, N-terminal	NO
AT1G14980	0.489418	5.60184	1.52103e-06	2.43835e-05	UP	chaperonin 10	chaperonin 10 (CPN10); FUNCTIONS IN: copper ion binding, chaperone binding; INVOLVED IN: protein folding, response to heat; LOCATED IN: mitochondrion; EXPRESSED IN: 23 plant structures; EXPRESSED DURING: 13 growth stages; CONTAINS InterPro DOMAIN/s: Chaperonin Cpn10 (InterPro:IPR020818), GroES-like (InterPro:IPR011032), Chaperonin Cpn10, conserved site (InterPro:IPR018369), Chaperonin Cpn10, subg…	Chaperonin Cpn10 | Chaperonin Cpn10, conserved site | GroES (chaperonin 10)-like	NO
AT1G15060	-0.680346	5.21067	3.49875e-08	7.88236e-07	DOWN	Uncharacterised conserved protein UCP031088, alpha/beta hydrolase	Uncharacterised conserved protein UCP031088, alpha/beta hydrolase; LOCATED IN: chloroplast; EXPRESSED IN: 23 plant structures; EXPRESSED DURING: 14 growth stages; CONTAINS InterPro DOMAIN/s: Uncharacterised conserved protein UCP031088, alpha/beta hydrolase, At1g15070 (InterPro:IPR016969), Alpha/beta hydrolase fold-1 (InterPro:IPR000073); BEST Arabidopsis thaliana protein match is: Uncharacterised…	Alpha/Beta hydrolase fold | Uncharacterised conserved protein UCP031088, alpha/beta hydrolase, At1g15070	NO
AT1G15100	-1.33523	3.55431	1.08985e-07	2.22317e-06	DOWN	RING-H2 finger A2A	RING-H2 finger A2A (RHA2A); FUNCTIONS IN: ubiquitin-protein ligase activity, zinc ion binding; INVOLVED IN: response to salt stress, positive regulation of abscisic acid mediated signaling pathway, regulation of response to osmotic stress; LOCATED IN: endomembrane system; EXPRESSED IN: 21 plant structures; EXPRESSED DURING: 8 growth stages; CONTAINS InterPro DOMAIN/s: Zinc finger, RING-type (Inte…	Zinc finger, RING-type | Zinc finger, RING/FYVE/PHD-type	NO
AT1G15110	0.317483	4.07135	0.00632011	0.0325685	UP	phosphatidyl serine synthase family protein	phosphatidyl serine synthase family protein; FUNCTIONS IN: CDP-diacylglycerol-serine O-phosphatidyltransferase activity; INVOLVED IN: phosphatidylserine biosynthetic process; LOCATED IN: cellular_component unknown; EXPRESSED IN: 17 plant structures; EXPRESSED DURING: 7 growth stages; CONTAINS InterPro DOMAIN/s: Phosphatidyl serine synthase (InterPro:IPR004277)	Phosphatidyl serine synthase	NO
AT1G15130	0.393005	6.152	3.37434e-05	0.000386438	UP	Endosomal targeting BRO1-like domain-containing protein	Endosomal targeting BRO1-like domain-containing protein; CONTAINS InterPro DOMAIN/s: BRO1 (InterPro:IPR004328)	ALIX V-shaped domain | BRO1 domain	NO
AT1G15140	-0.394975	5.48252	0.000117084	0.00113515	DOWN	FAD/NAD(P)-binding oxidoreductase	FAD/NAD(P)-binding oxidoreductase; FUNCTIONS IN: oxidoreductase activity, copper ion binding; INVOLVED IN: oxidation reduction; LOCATED IN: thylakoid, chloroplast; LOCATED IN: thylakoid, chloroplast, chloroplast stroma, chloroplast envelope; EXPRESSED IN: 23 plant structures; EXPRESSED DURING: 15 growth stages; CONTAINS InterPro DOMAIN/s: Oxidoreductase FAD/NAD(P)-binding (InterPro:IPR001433), Fe…	Ferredoxin reductase-type FAD-binding domain | Oxidoreductase FAD/NAD(P)-binding | Oxidoreductase, FAD-binding domain | Phenol hydroxylase reductase | Riboflavin synthase-like beta-barrel	NO
AT1G15150	-1.59316	-1.96694	0.00871362	0.0425153	DOWN	MATE efflux family protein	MATE efflux family protein; FUNCTIONS IN: antiporter activity, drug transmembrane transporter activity, transporter activity; INVOLVED IN: drug transmembrane transport, transmembrane transport; LOCATED IN: membrane; CONTAINS InterPro DOMAIN/s: MATE family transporter related protein (InterPro:IPR015521), Multi antimicrobial extrusion protein MatE (InterPro:IPR002528); BEST Arabidopsis thaliana pr…	Multi antimicrobial extrusion protein	NO
AT1G15165	-0.793065	2.23154	6.11548e-05	0.000644681	DOWN	RING/FYVE/PHD zinc finger superfamily protein	RING/FYVE/PHD zinc finger superfamily protein; FUNCTIONS IN: ubiquitin-protein ligase activity; INVOLVED IN: protein ubiquitination; LOCATED IN: ubiquitin ligase complex; CONTAINS InterPro DOMAIN/s: U box domain (InterPro:IPR003613); BEST Arabidopsis thaliana protein match is: ARM repeat superfamily protein (TAIR:AT1G67530.2)	U box domain | Zinc finger, RING/FYVE/PHD-type	NO
AT1G15210	0.927619	3.13587	1.56549e-06	2.49892e-05	UP	pleiotropic drug resistance 7	pleiotropic drug resistance 7 (PDR7); FUNCTIONS IN: ATPase activity, coupled to transmembrane movement of substances; INVOLVED IN: drug transmembrane transport; LOCATED IN: plasma membrane, chloroplast, membrane; EXPRESSED IN: 9 plant structures; EXPRESSED DURING: 4 anthesis, F mature embryo stage, petal differentiation and expansion stage, E expanded cotyledon stage, D bilateral stage; CONTAINS …	AAA+ ATPase domain | ABC transporter-like | ABC-2 type transporter | ABC-transporter extracellular N-terminal domain | P-loop containing nucleoside triphosphate hydrolase | Plant PDR ABC transporter associated	NO
AT1G15215	0.36985	3.10863	0.00782982	0.0388905	UP		BEST Arabidopsis thaliana protein match is: sequence-specific DNA binding transcription factors;sequence-specific DNA binding (TAIR:AT3G18380.1)		NO
AT1G15260	-1.03726	4.83051	2.85548e-15	1.9871e-13	DOWN		unknown protein; BEST Arabidopsis thaliana protein match is: unknown protein (TAIR:AT3G16070.1)		NO
AT1G15300	1.03727	2.27405	7.53748e-10	2.31422e-08	UP	transposable element gene	hAT-like transposase family (hobo/Ac/Tam3), has a 5.1e-59 P-value blast match to GB:CAA29005 ORFa of Maize Ac (hAT-element) (Zea mays)	HAT dimerisation domain, C-terminal | Ribonuclease H-like domain | hAT-like transposase, RNase-H fold	NO
AT1G15380	0.551948	2.3959	0.0075916	0.0378468	UP	Lactoylglutathione lyase / glyoxalase I family protein	Lactoylglutathione lyase / glyoxalase I family protein; CONTAINS InterPro DOMAIN/s: Glyoxalase/bleomycin resistance protein/dioxygenase (InterPro:IPR004360); BEST Arabidopsis thaliana protein match is: Lactoylglutathione lyase / glyoxalase I family protein (TAIR:AT1G80160.1)	Glyoxalase-like domain | Glyoxalase/Bleomycin resistance protein/Dihydroxybiphenyl dioxygenase	NO
AT1G15400	0.348951	5.9077	0.000236821	0.00206641	UP		unknown protein; FUNCTIONS IN: molecular_function unknown; INVOLVED IN: biological_process unknown; LOCATED IN: plasma membrane; EXPRESSED IN: 23 plant structures; EXPRESSED DURING: 13 growth stages; BEST Arabidopsis thaliana protein match is: unknown protein (TAIR:AT1G80180.1)		NO
AT1G15405	2.94337	2.70594	2.91867e-50	4.1369e-47	UP	other RNA			NO
AT1G15410	-0.329642	4.72773	0.00550858	0.0291629	DOWN	aspartate-glutamate racemase family	aspartate-glutamate racemase family; FUNCTIONS IN: racemase and epimerase activity, acting on amino acids and derivatives; INVOLVED IN: metabolic process, cellular amino acid metabolic process; LOCATED IN: chloroplast; EXPRESSED IN: 22 plant structures; EXPRESSED DURING: 13 growth stages; CONTAINS InterPro DOMAIN/s: Asp/Glu/hydantoin racemase (InterPro:IPR015942), Aspartate racemase (InterPro:IPR…	Asp/Glu racemase | Asp/Glu/hydantoin racemase	NO
AT1G15420	0.720461	3.63895	1.94844e-08	4.62477e-07	UP		CONTAINS InterPro DOMAIN/s: Small-subunit processome, Utp12 (InterPro:IPR007148)	Small-subunit processome, Utp12	NO
AT1G15440	0.541678	3.60011	0.000243039	0.00211519	UP	periodic tryptophan protein 2	periodic tryptophan protein 2 (PWP2); FUNCTIONS IN: nucleotide binding; INVOLVED IN: biological_process unknown; LOCATED IN: CUL4 RING ubiquitin ligase complex; EXPRESSED IN: 24 plant structures; EXPRESSED DURING: 13 growth stages; CONTAINS InterPro DOMAIN/s: WD40 repeat 2 (InterPro:IPR019782), WD40 repeat, conserved site (InterPro:IPR019775), WD40 repeat (InterPro:IPR001680), Small-subunit proce…	G-protein beta WD-40 repeat | Periodic tryptophan protein 2 | Quinonprotein alcohol dehydrogenase-like superfamily | Small-subunit processome, Utp12 | WD40 repeat | WD40 repeat, conserved site | WD40-repeat-containing domain | WD40/YVTN repeat-like-containing domain	NO
AT1G15480	0.71852	2.62819	0.0001213	0.00116896	UP	Tetratricopeptide repeat (TPR)-like superfamily protein	Tetratricopeptide repeat (TPR)-like superfamily protein; CONTAINS InterPro DOMAIN/s: Pentatricopeptide repeat (InterPro:IPR002885); BEST Arabidopsis thaliana protein match is: PENTATRICOPEPTIDE REPEAT 596 (TAIR:AT1G80270.3)	Pentatricopeptide repeat | Tetratricopeptide-like helical domain	NO
AT1G15510	-0.660493	2.7056	0.00106093	0.00740929	DOWN	Tetratricopeptide repeat (TPR)-like superfamily protein	EARLY CHLOROPLAST BIOGENESIS2 (ECB2); CONTAINS InterPro DOMAIN/s: Pentatricopeptide repeat (InterPro:IPR002885); BEST Arabidopsis thaliana protein match is: Pentatricopeptide repeat (PPR) superfamily protein (TAIR:AT4G18750.1)	Pentatricopeptide repeat | Tetratricopeptide-like helical domain	YES	1:5329154:G-A;protein_coding;missense;GGC>GAC;G>D
AT1G15530	0.601526	3.75616	9.19172e-07	1.541e-05	UP	Concanavalin A-like lectin protein kinase family protein	Concanavalin A-like lectin protein kinase family protein; FUNCTIONS IN: carbohydrate binding, kinase activity; INVOLVED IN: protein amino acid phosphorylation; LOCATED IN: plasma membrane, vacuole; EXPRESSED IN: synergid, cultured cell; CONTAINS InterPro DOMAIN/s: Legume lectin, beta chain (InterPro:IPR001220), Protein kinase, ATP binding site (InterPro:IPR017441), Serine/threonine-protein kinase…	Concanavalin A-like lectin/glucanase, subgroup | Concanavalin A-like lectin/glucanases superfamily | Legume lectin domain | Legume lectin, beta chain, Mn/Ca-binding site | Protein kinase domain | Protein kinase, ATP binding site | Protein kinase-like domain | Serine/threonine-protein kinase, active site	NO
AT1G15580	-1.46134	0.0231872	5.83771e-06	8.1585e-05	DOWN	indole-3-acetic acid inducible 5	indole-3-acetic acid inducible 5 (IAA5); FUNCTIONS IN: sequence-specific DNA binding transcription factor activity; INVOLVED IN: response to auxin stimulus, response to cyclopentenone, response to brassinosteroid stimulus; LOCATED IN: nucleus; EXPRESSED IN: flower; EXPRESSED DURING: petal differentiation and expansion stage; CONTAINS InterPro DOMAIN/s: Aux/IAA-ARF-dimerisation (InterPro:IPR011525…	AUX/IAA protein | Aux/IAA-ARF-dimerisation	NO
AT1G15640	1.32453	-1.74525	0.00821567	0.0404846	UP		unknown protein; BEST Arabidopsis thaliana protein match is: unknown protein (TAIR:AT1G15620.1)		NO
AT1G15660	0.406944	4.04768	0.000809045	0.00589432	UP	centromere protein C	centromere protein C (CENP-C)	Centromere protein C/Mif2/cnp3	NO
AT1G15670	2.37735	5.41389	1.90374e-16	1.5639e-14	UP	Galactose oxidase/kelch repeat superfamily protein	Galactose oxidase/kelch repeat superfamily protein; CONTAINS InterPro DOMAIN/s: Galactose oxidase/kelch, beta-propeller (InterPro:IPR011043), Kelch repeat type 1 (InterPro:IPR006652), Kelch related (InterPro:IPR013089), Kelch-type beta propeller (InterPro:IPR015915); BEST Arabidopsis thaliana protein match is: Galactose oxidase/kelch repeat superfamily protein (TAIR:AT1G80440.1)	Galactose oxidase, beta-propeller | Kelch repeat type 1	NO
AT1G15690	0.314927	9.09189	0.00105548	0.00737698	UP	Inorganic H pyrophosphatase family protein	AVP1; FUNCTIONS IN: hydrogen-translocating pyrophosphatase activity; INVOLVED IN: response to water deprivation, response to salt stress, establishment or maintenance of transmembrane electrochemical gradient, leaf development, auxin polar transport; LOCATED IN: in 10 components; LOCATED IN: in 7 components; EXPRESSED IN: 27 plant structures; EXPRESSED IN: 28 plant structures; EXPRESSED DURING: 1…	Pyrophosphate-energised proton pump	YES	1:5401138:G-A;protein_coding;missense;GCT>ACT;A>T
AT1G15790	0.741523	1.77192	0.000962409	0.00681814	UP		unknown protein; BEST Arabidopsis thaliana protein match is: unknown protein (TAIR:AT1G15780.1)	Coactivator CBP, KIX domain	NO
AT1G15820	-0.583661	11.6752	1.51698e-08	3.70511e-07	DOWN	light harvesting complex photosystem II subunit 6	light harvesting complex photosystem II subunit 6 (LHCB6); FUNCTIONS IN: chlorophyll binding; INVOLVED IN: photosynthesis, nonphotochemical quenching; LOCATED IN: in 7 components; EXPRESSED IN: 24 plant structures; EXPRESSED DURING: 14 growth stages; CONTAINS InterPro DOMAIN/s: Chlorophyll A-B binding protein (InterPro:IPR001344); BEST Arabidopsis thaliana protein match is: photosystem I light ha…	Chlorophyll A-B binding protein | Chlorophyll A-B binding protein, plant | Chlorophyll a/b binding protein domain	NO
AT1G15890	0.668238	1.71456	0.000688129	0.00513558	UP	Disease resistance protein (CC-NBS-LRR class) family	Disease resistance protein (CC-NBS-LRR class) family; FUNCTIONS IN: ATP binding; INVOLVED IN: N-terminal protein myristoylation, apoptosis, defense response; LOCATED IN: cellular_component unknown; EXPRESSED IN: 8 plant structures; EXPRESSED DURING: 6 growth stages; CONTAINS InterPro DOMAIN/s: NB-ARC (InterPro:IPR002182), Leucine-rich repeat (InterPro:IPR001611), Disease resistance protein (Inter…	Leucine-rich repeat | NB-ARC | P-loop containing nucleoside triphosphate hydrolase	NO
AT1G15910	0.340568	4.82872	0.003521	0.0201753	UP	XH/XS domain-containing protein	XH/XS domain-containing protein; CONTAINS InterPro DOMAIN/s: Domain of unknown function XS (InterPro:IPR005380), Domain of unknown function XH (InterPro:IPR005379), Domain of unknown function, putative Zinc finger, XS/XH (InterPro:IPR005381); BEST Arabidopsis thaliana protein match is: XH/XS domain-containing protein (TAIR:AT4G00380.1)	Uncharacterised domain XH | XS domain | Zinc finger-XS domain	NO
AT1G15960	-0.630529	3.49717	0.00872315	0.0425557	DOWN	NRAMP metal ion transporter 6	NRAMP metal ion transporter 6 (NRAMP6); FUNCTIONS IN: inorganic anion transmembrane transporter activity, metal ion transmembrane transporter activity; INVOLVED IN: cellular metal ion homeostasis, metal ion transport; LOCATED IN: membrane; EXPRESSED IN: 12 plant structures; EXPRESSED DURING: LP.06 six leaves visible, LP.04 four leaves visible, 4 anthesis, petal differentiation and expansion stage…	NRAMP family	NO
AT1G15980	-0.700602	8.02332	5.02243e-12	2.16318e-10	DOWN	NDH-dependent cyclic electron flow 1	NDH-dependent cyclic electron flow 1 (NDF1); INVOLVED IN: photosynthetic electron transport in photosystem I; LOCATED IN: chloroplast thylakoid membrane, chloroplast, NAD(P)H dehydrogenase complex (plastoquinone); EXPRESSED IN: 21 plant structures; EXPRESSED DURING: 13 growth stages		NO
AT1G16020	-0.417433	4.28594	0.000522958	0.00406596	DOWN	Protein of unknown function (DUF1712)	Protein of unknown function (DUF1712); CONTAINS InterPro DOMAIN/s: Protein of unknown function DUF1712, fungi (InterPro:IPR013176); BEST Arabidopsis thaliana protein match is: Protein of unknown function (DUF1712) (TAIR:AT1G80910.1)	Protein of unknown function DUF1712, fungi	NO
AT1G16030	0.819561	3.19763	1.05444e-05	0.000138405	UP	heat shock protein 70B	heat shock protein 70B (Hsp70b); FUNCTIONS IN: ATP binding; INVOLVED IN: protein folding, response to heat; LOCATED IN: cytosol, cell wall, plasma membrane, chloroplast, membrane; EXPRESSED IN: 19 plant structures; EXPRESSED DURING: 10 growth stages; CONTAINS InterPro DOMAIN/s: Heat shock protein 70, conserved site (InterPro:IPR018181), Heat shock protein Hsp70 (InterPro:IPR001023), Heat shock pr…	Heat shock protein 70 family | Heat shock protein 70, conserved site | Heat shock protein 70kD, C-terminal domain | Heat shock protein 70kD, peptide-binding domain	NO
AT1G16090	-5.43172	1.80314	2.09638e-72	1.1768e-68	DOWN	wall associated kinase-like 7	wall associated kinase-like 7 (WAKL7); FUNCTIONS IN: protein serine/threonine kinase activity; LOCATED IN: endomembrane system, integral to membrane; EXPRESSED IN: 12 plant structures; EXPRESSED DURING: 7 growth stages; CONTAINS InterPro DOMAIN/s: Wall-associated kinase (InterPro:IPR013695); BEST Arabidopsis thaliana protein match is: Wall-associated kinase family protein (TAIR:AT1G79670.1)	Wall-associated receptor kinase | Wall-associated receptor kinase galacturonan-binding domain	NO
AT1G16110	0.436823	3.81666	0.00562495	0.0296578	UP	wall associated kinase-like 6	wall associated kinase-like 6 (WAKL6); FUNCTIONS IN: kinase activity; INVOLVED IN: protein amino acid phosphorylation; LOCATED IN: endomembrane system, integral to membrane; CONTAINS InterPro DOMAIN/s: Wall-associated kinase (InterPro:IPR013695), Protein kinase, catalytic domain (InterPro:IPR000719), Serine/threonine-protein kinase domain (InterPro:IPR002290), Tyrosine-protein kinase, catalytic d…	Concanavalin A-like lectin/glucanase, subgroup | Protein kinase domain | Protein kinase-like domain | Serine/threonine-protein kinase, active site | Wall-associated receptor kinase | Wall-associated receptor kinase galacturonan-binding domain	YES	1:5518961:G-A;protein_coding;missense;GGT>GAT;G>D
AT1G16130	0.928347	1.59996	0.00122864	0.00837011	UP	wall associated kinase-like 2	wall associated kinase-like 2 (WAKL2); FUNCTIONS IN: kinase activity; INVOLVED IN: protein amino acid phosphorylation; LOCATED IN: integral to membrane; EXPRESSED IN: stem, cotyledon, leaf whorl, leaf; EXPRESSED DURING: LP.06 six leaves visible, LP.04 four leaves visible, LP.10 ten leaves visible, LP.08 eight leaves visible, LP.12 twelve leaves visible; CONTAINS InterPro DOMAIN/s: Wall-associated…	Concanavalin A-like lectin/glucanase, subgroup | EGF-like calcium-binding, conserved site | Protein kinase domain | Protein kinase-like domain | Serine/threonine-protein kinase, active site | Wall-associated receptor kinase | Wall-associated receptor kinase galacturonan-binding domain	NO
AT1G16240	0.288687	6.15302	0.00231462	0.0142189	UP	syntaxin of plants 51	syntaxin of plants 51 (SYP51); CONTAINS InterPro DOMAIN/s: Target SNARE coiled-coil domain (InterPro:IPR000727), t-SNARE (InterPro:IPR010989), Syntaxin/epimorphin, conserved site (InterPro:IPR006012); FUNCTIONS IN: SNAP receptor activity; BEST Arabidopsis thaliana protein match is: syntaxin of plants 52 (TAIR:AT1G79590.2); INVOLVED IN: vesicle-mediated transport; LOCATED IN: endosome membrane, va…	Syntaxin/epimorphin, conserved site | Target SNARE coiled-coil domain	NO
AT1G16250	0.323292	4.12891	0.0040723	0.022765	UP	Galactose oxidase/kelch repeat superfamily protein	Galactose oxidase/kelch repeat superfamily protein; CONTAINS InterPro DOMAIN/s: F-box domain, cyclin-like (InterPro:IPR001810), Galactose oxidase/kelch, beta-propeller (InterPro:IPR011043), Kelch repeat type 1 (InterPro:IPR006652), Kelch related (InterPro:IPR013089), Kelch-type beta propeller (InterPro:IPR015915); BEST Arabidopsis thaliana protein match is: Galactose oxidase/kelch repeat superfam…	F-box domain | Kelch repeat type 1 | Kelch-type beta propeller	NO
AT1G16260	-0.600764	4.42557	7.67158e-08	1.61259e-06	DOWN	Wall-associated kinase family protein	Wall-associated kinase family protein; FUNCTIONS IN: kinase activity; INVOLVED IN: protein amino acid phosphorylation; LOCATED IN: endomembrane system, integral to membrane; EXPRESSED IN: 19 plant structures; EXPRESSED DURING: 13 growth stages; CONTAINS InterPro DOMAIN/s: Wall-associated kinase (InterPro:IPR013695), EGF-like calcium-binding, conserved site (InterPro:IPR018097), Protein kinase, ca…	Concanavalin A-like lectin/glucanase, subgroup | EGF-like calcium-binding domain | EGF-like calcium-binding, conserved site | Protein kinase domain | Protein kinase-like domain | Serine-threonine/tyrosine-protein kinase catalytic domain | Serine/threonine-protein kinase, active site | Wall-associated receptor kinase | Wall-associated receptor kinase galacturonan-binding domain	NO
AT1G16320	-0.559299	6.73037	2.26555e-08	5.32121e-07	DOWN	Uncharacterized conserved protein (DUF2358)	Uncharacterized conserved protein (DUF2358); FUNCTIONS IN: molecular_function unknown; INVOLVED IN: biological_process unknown; LOCATED IN: chloroplast; CONTAINS InterPro DOMAIN/s: Protein of unknown function DUF2358 (InterPro:IPR018790); BEST Arabidopsis thaliana protein match is: Uncharacterized conserved protein (DUF2358) (TAIR:AT1G79510.2)	Protein of unknown function DUF2358	NO
AT1G16350	0.520396	5.22266	4.77937e-07	8.49916e-06	UP	Aldolase-type TIM barrel family protein	Aldolase-type TIM barrel family protein; FUNCTIONS IN: IMP dehydrogenase activity, oxidoreductase activity, catalytic activity; INVOLVED IN: oxidation reduction, GMP biosynthetic process, metabolic process; LOCATED IN: cellular_component unknown; EXPRESSED IN: 24 plant structures; EXPRESSED DURING: 13 growth stages; CONTAINS InterPro DOMAIN/s: IMP dehydrogenase (InterPro:IPR005990), IMP dehydroge…	Aldolase-type TIM barrel | IMP dehydrogenase / GMP reductase, conserved site | IMP dehydrogenase/GMP reductase | Inosine-5'-monophosphate dehydrogenase	YES	1:5591751:G-A;protein_coding;missense;GGT>GAT;G>D
AT1G16370	0.726974	1.31317	0.000288579	0.00245383	UP	organic cation/carnitine transporter 6	organic cation/carnitine transporter 6 (OCT6); FUNCTIONS IN: carbohydrate transmembrane transporter activity, sugar:hydrogen symporter activity; INVOLVED IN: transport, transmembrane transport; LOCATED IN: integral to membrane, membrane; EXPRESSED IN: 11 plant structures; EXPRESSED DURING: LP.06 six leaves visible, 4 anthesis, petal differentiation and expansion stage; CONTAINS InterPro DOMAIN/s:…	General substrate transporter | Major facilitator superfamily domain | Major facilitator superfamily domain, general substrate transporter	NO
AT1G16390	0.852496	1.44376	0.00875262	0.0426663	UP	organic cation/carnitine transporter 3	organic cation/carnitine transporter 3 (3-Oct); FUNCTIONS IN: carbohydrate transmembrane transporter activity, sugar:hydrogen symporter activity; INVOLVED IN: transport, transmembrane transport; LOCATED IN: integral to membrane, membrane; EXPRESSED IN: 9 plant structures; EXPRESSED DURING: 6 growth stages; CONTAINS InterPro DOMAIN/s: Major facilitator superfamily (InterPro:IPR020846), General sub…	General substrate transporter | Major facilitator superfamily domain | Major facilitator superfamily domain, general substrate transporter	NO
AT1G16400	-0.963999	3.39297	0.000273199	0.00233959	DOWN	cytochrome P450, family 79, subfamily F, polypeptide 2	cytochrome P450, family 79, subfamily F, polypeptide 2 (CYP79F2); CONTAINS InterPro DOMAIN/s: Cytochrome P450 (InterPro:IPR001128), Cytochrome P450, E-class, group I (InterPro:IPR002401), Cytochrome P450, conserved site (InterPro:IPR017972); BEST Arabidopsis thaliana protein match is: cytochrome p450 79f1 (TAIR:AT1G16410.1)	Cytochrome P450 | Cytochrome P450, E-class, group I | Cytochrome P450, conserved site	NO
AT1G16445	-1.55288	1.18161	2.17724e-10	7.29668e-09	DOWN	S-adenosyl-L-methionine-dependent methyltransferases superfamily protein	S-adenosyl-L-methionine-dependent methyltransferases superfamily protein; INVOLVED IN: biological_process unknown; LOCATED IN: chloroplast; CONTAINS InterPro DOMAIN/s: Putative rRNA methylase (InterPro:IPR010719)	Putative rRNA methylase | S-adenosyl-L-methionine-dependent methyltransferase-like	NO
AT1G16460	-0.452848	6.01058	1.13398e-05	0.000147808	DOWN	rhodanese homologue 2	rhodanese homologue 2 (RDH2); FUNCTIONS IN: 3-mercaptopyruvate sulfurtransferase activity, thiosulfate sulfurtransferase activity; INVOLVED IN: sulfate transport, aging; LOCATED IN: cytosol, cytoplasm; EXPRESSED IN: 22 plant structures; EXPRESSED DURING: 13 growth stages; CONTAINS InterPro DOMAIN/s: Rhodanese-like (InterPro:IPR001763), Thiosulphate sulfurtransferase, conserved site (InterPro:IPR0…	Rhodanese-like domain | Thiosulphate sulfurtransferase, conserved site	NO
AT1G16480	0.623201	1.46265	0.00814747	0.0402368	UP	Tetratricopeptide repeat (TPR)-like superfamily protein	Tetratricopeptide repeat (TPR)-like superfamily protein; FUNCTIONS IN: molecular_function unknown; INVOLVED IN: biological_process unknown; LOCATED IN: cellular_component unknown; EXPRESSED IN: shoot apex; CONTAINS InterPro DOMAIN/s: Pentatricopeptide repeat (InterPro:IPR002885); BEST Arabidopsis thaliana protein match is: Pentatricopeptide repeat (PPR) superfamily protein (TAIR:AT4G13650.1)	Pentatricopeptide repeat | Tetratricopeptide-like helical domain	NO
AT1G16489	-2.45183	0.439327	2.63873e-16	2.1313e-14	DOWN	other RNA			NO
AT1G16490	-1.31939	-0.911202	0.00205675	0.0129025	DOWN	myb domain protein 58	myb domain protein 58 (MYB58); CONTAINS InterPro DOMAIN/s: SANT, DNA-binding (InterPro:IPR001005), Homeodomain-like (InterPro:IPR009057), Myb, DNA-binding (InterPro:IPR014778), HTH transcriptional regulator, Myb-type, DNA-binding (InterPro:IPR017930), Homeodomain-related (InterPro:IPR012287), Myb transcription factor (InterPro:IPR015495); BEST Arabidopsis thaliana protein match is: myb domain pro…	Homeodomain-like | Myb domain | SANT/Myb domain	NO
AT1G16500	-1.32639	0.459144	3.86485e-07	7.00602e-06	DOWN		unknown protein; BEST Arabidopsis thaliana protein match is: unknown protein (TAIR:AT1G79160.1)		NO
AT1G16515	-2.15687	1.62865	2.87603e-07	5.37257e-06	DOWN		unknown protein		NO
AT1G16705	1.89419	-0.805766	1.35757e-07	2.70557e-06	UP	p300/CBP acetyltransferase-related protein-related	p300/CBP acetyltransferase-related protein-related; BEST Arabidopsis thaliana protein match is: histone acetyltransferase of the CBP family 12 (TAIR:AT1G16710.2)		NO
AT1G16720	-0.431447	8.5364	1.38785e-05	0.000176593	DOWN	high chlorophyll fluorescence phenotype 173	high chlorophyll fluorescence phenotype 173 (HCF173); FUNCTIONS IN: binding, catalytic activity; INVOLVED IN: photosystem II assembly, translational initiation; LOCATED IN: chloroplast, chloroplast envelope; EXPRESSED IN: 23 plant structures; EXPRESSED DURING: 13 growth stages; CONTAINS InterPro DOMAIN/s: NAD(P)-binding domain (InterPro:IPR016040), NADH:ubiquinone oxidoreductase intermediate-asso…	Galactose-binding domain-like | NAD(P)-binding domain | NADH:ubiquinone oxidoreductase intermediate-associated protein 30	NO
AT1G16730	-0.519689	3.78801	0.000728401	0.00538838	DOWN	unknown protein 6	unknown protein 6 (UP6)		YES	1:5727047:G-A;protein_coding;missense;GCG>GTG;A>V
AT1G16750	-0.451285	4.18912	0.00887257	0.0431533	DOWN	Protein of unknown function, DUF547	Protein of unknown function, DUF547; CONTAINS InterPro DOMAIN/s: Protein of unknown function DUF547 (InterPro:IPR006869); BEST Arabidopsis thaliana protein match is: Protein of unknown function, DUF547 (TAIR:AT3G13000.2)	Domain of unknown function DUF547 | Ternary complex factor MIP1, leucine-zipper	NO
AT1G16780	-0.418906	4.1971	0.00199612	0.0125831	DOWN	Inorganic H pyrophosphatase family protein	VHP2;2; FUNCTIONS IN: inorganic diphosphatase activity, hydrogen-translocating pyrophosphatase activity; INVOLVED IN: proton transport; LOCATED IN: Golgi apparatus, vacuole; EXPRESSED IN: 22 plant structures; EXPRESSED DURING: 13 growth stages; CONTAINS InterPro DOMAIN/s: Inorganic H+ pyrophosphatase (InterPro:IPR004131); BEST Arabidopsis thaliana protein match is: vacuolar H+-pyrophosphatase 2 (…		NO
AT1G16790	0.63859	3.14129	1.44439e-06	2.32751e-05	UP	ribosomal protein-related	ribosomal protein-related; FUNCTIONS IN: molecular_function unknown; INVOLVED IN: biological_process unknown; LOCATED IN: chloroplast thylakoid membrane, chloroplast, chloroplast envelope; EXPRESSED IN: 19 plant structures; EXPRESSED DURING: 11 growth stages		NO
AT1G16880	-0.619861	8.37746	5.47938e-11	2.02359e-09	DOWN	uridylyltransferase-related	uridylyltransferase-related; INVOLVED IN: response to cold; LOCATED IN: chloroplast thylakoid membrane, stromule, chloroplast; LOCATED IN: chloroplast thylakoid membrane, stromule, chloroplast stroma, chloroplast, chloroplast envelope; EXPRESSED IN: 22 plant structures; EXPRESSED DURING: 13 growth stages; BEST Arabidopsis thaliana protein match is: ACT domain-containing protein (TAIR:AT5G04740.1)	ACT domain	NO
AT1G16970	-0.456358	3.65996	0.000177308	0.00160881	DOWN	KU70 homolog	KU70 homolog (KU70); FUNCTIONS IN: double-stranded DNA binding, protein binding; INVOLVED IN: DNA repair, response to heat, telomere maintenance; LOCATED IN: nucleus, DNA-dependent protein kinase-DNA ligase 4 complex; EXPRESSED IN: 23 plant structures; EXPRESSED DURING: 15 growth stages; CONTAINS InterPro DOMAIN/s: Ku70/Ku80, N-terminal alpha/beta (InterPro:IPR005161), DNA-binding SAP (InterPro:I…	Ku70 | Ku70/Ku80 C-terminal arm | Ku70/Ku80 beta-barrel domain | Ku70/Ku80, N-terminal alpha/beta | SAP domain | SPOC like C-terminal domain | von Willebrand factor, type A	NO
AT1G17050	-0.898892	5.88614	1.75318e-13	9.60145e-12	DOWN	solanesyl diphosphate synthase 2	solanesyl diphosphate synthase 2 (SPS2); FUNCTIONS IN: trans-octaprenyltranstransferase activity; INVOLVED IN: ubiquinone biosynthetic process; LOCATED IN: chloroplast, plastid; EXPRESSED IN: 22 plant structures; EXPRESSED DURING: 13 growth stages; CONTAINS InterPro DOMAIN/s: Solanesyl diphosphate synthase (InterPro:IPR014120), Polyprenyl synthetase-related (InterPro:IPR017446), Terpenoid synthas…	Polyprenyl synthetase | Polyprenyl synthetase-related | Solanesyl diphosphate synthase | Terpenoid synthase	NO
AT1G17060	1.91442	3.00397	3.59058e-20	4.91603e-18	UP	cytochrome p450 72c1	cytochrome p450 72c1 (CYP72C1); FUNCTIONS IN: electron carrier activity, monooxygenase activity, iron ion binding, oxygen binding, heme binding; INVOLVED IN: response to light stimulus, brassinosteroid metabolic process, unidimensional cell growth; LOCATED IN: endomembrane system; EXPRESSED IN: 10 plant structures; EXPRESSED DURING: 6 growth stages; CONTAINS InterPro DOMAIN/s: Cytochrome P450 (In…		YES	1:5833053:C-CA;exonic_variant,1:5833053:C-CA;intronic_variant,1:5833053:C-CA;exonic_variant&protein_coding
AT1G17100	-0.950109	5.67977	2.91097e-19	3.67208e-17	DOWN	SOUL heme-binding family protein	SOUL heme-binding family protein; FUNCTIONS IN: binding; INVOLVED IN: biological_process unknown; LOCATED IN: plasma membrane, vacuole; EXPRESSED IN: 24 plant structures; EXPRESSED DURING: 14 growth stages; CONTAINS InterPro DOMAIN/s: SOUL haem-binding protein (InterPro:IPR006917); BEST Arabidopsis thaliana protein match is: SOUL heme-binding family protein (TAIR:AT1G78450.1)	Regulatory factor, effector binding domain | SOUL haem-binding protein	NO
AT1G17140	-0.38699	5.22197	0.00815948	0.0402666	DOWN	interactor of constitutive active rops 1	interactor of constitutive active rops 1 (ICR1); BEST Arabidopsis thaliana protein match is: ROP interactive partner 2 (TAIR:AT1G78430.1)		NO
AT1G17145	0.909032	5.20665	7.92783e-18	7.78476e-16	UP	RING/U-box superfamily protein	RING/U-box superfamily protein; FUNCTIONS IN: zinc ion binding; INVOLVED IN: biological_process unknown; LOCATED IN: cellular_component unknown; EXPRESSED IN: 24 plant structures; EXPRESSED DURING: 15 growth stages; CONTAINS InterPro DOMAIN/s: Zinc finger, RING-type (InterPro:IPR001841); BEST Arabidopsis thaliana protein match is: RING/U-box superfamily protein (TAIR:AT1G78420.2)	Zinc finger, RING-type | Zinc finger, RING/FYVE/PHD-type	NO
AT1G17210	0.261752	6.61579	0.00614742	0.031894	UP	IAP-like protein 1	IAP-like protein 1 (ILP1); FUNCTIONS IN: zinc ion binding; LOCATED IN: cytosol, nucleus, phragmoplast; EXPRESSED IN: 23 plant structures; EXPRESSED DURING: 13 growth stages; CONTAINS InterPro DOMAIN/s: Zinc finger, C3HC-like (InterPro:IPR012935), Proteinase inhibitor I32, inhibitor of apoptosis (InterPro:IPR001370); BEST Arabidopsis thaliana protein match is: C3HC zinc finger-like (TAIR:AT1G48950…	Baculoviral inhibition of apoptosis protein repeat | Zinc finger, C3HC-like	NO
AT1G17220	-0.568895	8.60876	1.06693e-07	2.18185e-06	DOWN	Translation initiation factor 2, small GTP-binding protein	fu-gaeri1 (FUG1); FUNCTIONS IN: translation initiation factor activity; INVOLVED IN: translational initiation; LOCATED IN: chloroplast, chloroplast envelope; EXPRESSED IN: 23 plant structures; EXPRESSED DURING: 13 growth stages; CONTAINS InterPro DOMAIN/s: Translation initiation factor IF-2, N-terminal (InterPro:IPR006847), Small GTP-binding protein (InterPro:IPR005225), Translation elongation fa…	Elongation factor, GTP-binding domain | P-loop containing nucleoside triphosphate hydrolase | Small GTP-binding protein domain | Translation elongation factor EFTu/EF1A, domain 2 | Translation initiation factor IF- 2 | Translation initiation factor IF- 2, domain 3 | Translation initiation factor IF-2, N-terminal | Translation initiation factor aIF-2, bacterial-like | Translation protein, beta-bar…	NO
AT1G17230	0.424838	4.02632	0.00270664	0.0162124	UP	Leucine-rich receptor-like protein kinase family protein	Leucine-rich receptor-like protein kinase family protein; FUNCTIONS IN: protein serine/threonine kinase activity, protein kinase activity, ATP binding; INVOLVED IN: protein amino acid phosphorylation; LOCATED IN: endomembrane system; EXPRESSED IN: 11 plant structures; EXPRESSED DURING: 6 growth stages; CONTAINS InterPro DOMAIN/s: Serine/threonine-protein kinase domain (InterPro:IPR002290), Leucin…	Concanavalin A-like lectin/glucanase, subgroup | Leucine-rich repeat | Leucine-rich repeat-containing N-terminal, type 2 | Protein kinase domain | Protein kinase-like domain | Serine/threonine-protein kinase, active site	NO
AT1G17240	-1.24847	-0.480932	2.34948e-05	0.000280812	DOWN	receptor like protein 2	receptor like protein 2 (RLP2); CONTAINS InterPro DOMAIN/s: Leucine-rich repeat-containing N-terminal domain, type 2 (InterPro:IPR013210), Leucine-rich repeat (InterPro:IPR001611); BEST Arabidopsis thaliana protein match is: Leucine-rich receptor-like protein kinase family protein (TAIR:AT1G72300.1)	Leucine-rich repeat | Leucine-rich repeat-containing N-terminal, type 2	NO
AT1G17290	0.523699	7.44935	6.38633e-05	0.000669167	UP	alanine aminotransferas	alanine aminotransferas (AlaAT1); FUNCTIONS IN: L-alanine:2-oxoglutarate aminotransferase activity, ATP binding; INVOLVED IN: response to cadmium ion, response to hypoxia, L-alanine catabolic process, by transamination; LOCATED IN: mitochondrion, chloroplast; EXPRESSED IN: 9 plant structures; EXPRESSED DURING: L mature pollen stage, M germinated pollen stage; CONTAINS InterPro DOMAIN/s: 1-aminocy…	Aminotransferase, class I/classII | Pyridoxal phosphate-dependent transferase | Pyridoxal phosphate-dependent transferase, major region, subdomain 1 | Pyridoxal phosphate-dependent transferase, major region, subdomain 2	NO
AT1G17345	3.65301	0.98275	7.06557e-17	6.08633e-15	UP	SAUR-like auxin-responsive protein family	SAUR-like auxin-responsive protein family ; CONTAINS InterPro DOMAIN/s: Auxin responsive SAUR protein (InterPro:IPR003676); BEST Arabidopsis thaliana protein match is: SAUR-like auxin-responsive protein family (TAIR:AT1G72430.1)	Auxin-induced protein, ARG7	NO
AT1G17360	-0.454481	5.75583	8.08923e-06	0.000109287	DOWN		BEST Arabidopsis thaliana protein match is: COP1-interacting protein-related (TAIR:AT1G72410.1)		NO
AT1G17380	1.60086	0.0407566	0.00044209	0.00352677	UP	jasmonate-zim-domain protein 5	jasmonate-zim-domain protein 5 (JAZ5); CONTAINS InterPro DOMAIN/s: Tify (InterPro:IPR010399), CCT domain-like (InterPro:IPR018467); BEST Arabidopsis thaliana protein match is: jasmonate-zim-domain protein 6 (TAIR:AT1G72450.1)	CO/COL/TOC1, conserved site | Tify	NO
AT1G17420	-1.40979	2.01702	8.90974e-13	4.36811e-11	DOWN	lipoxygenase 3	lipoxygenase 3 (LOX3); FUNCTIONS IN: oxidoreductase activity, acting on single donors with incorporation of molecular oxygen, incorporation of two atoms of oxygen, lipoxygenase activity, iron ion binding, metal ion binding; INVOLVED IN: growth, response to fungus, jasmonic acid biosynthetic process, response to wounding, defense response; LOCATED IN: chloroplast; EXPRESSED IN: 22 plant structures…	Lipase/lipooxygenase, PLAT/LH2 | Lipoxygenase | Lipoxygenase, C-terminal | Lipoxygenase, conserved site | Lipoxygenase, domain 3 | Lipoxygenase, iron binding site | Lipoxygenase, plant | PLAT/LH2 domain	NO
AT1G17480	-0.736833	1.03028	0.00080846	0.00589261	DOWN	IQ-domain 7	IQ-domain 7 (IQD7); CONTAINS InterPro DOMAIN/s: IQ calmodulin-binding region (InterPro:IPR000048); BEST Arabidopsis thaliana protein match is: IQ-domain 8 (TAIR:AT1G72670.1)	IQ motif, EF-hand binding site | P-loop containing nucleoside triphosphate hydrolase	NO
AT1G17490	-0.376091	3.20358	0.00882699	0.0429565	DOWN		unknown protein; BEST Arabidopsis thaliana protein match is: unknown protein (TAIR:AT1G72690.1)		NO
AT1G17530	0.514605	5.02736	1.40252e-07	2.782e-06	UP	translocase of inner mitochondrial membrane 23	translocase of inner mitochondrial membrane 23 (TIM23-1); CONTAINS InterPro DOMAIN/s: Mitochondrial inner membrane translocase complex, subunit Tim23 (InterPro:IPR005681), Mitochondrial inner membrane translocase complex, subunit Tim17/22 (InterPro:IPR003397); BEST Arabidopsis thaliana protein match is: translocase inner membrane subunit 23-2 (TAIR:AT1G72750.1)	Mitochondrial inner membrane translocase subunit Tim17/Tim22/Tim23/peroxisomal protein PMP24	NO
AT1G17620	0.969697	4.8879	3.01655e-06	4.49361e-05	UP	Late embryogenesis abundant (LEA) hydroxyproline-rich glycoprotein family	Late embryogenesis abundant (LEA) hydroxyproline-rich glycoprotein family; FUNCTIONS IN: molecular_function unknown; INVOLVED IN: biological_process unknown; LOCATED IN: plasma membrane; EXPRESSED IN: 23 plant structures; EXPRESSED DURING: 13 growth stages; CONTAINS InterPro DOMAIN/s: Late embryogenesis abundant protein, group 2 (InterPro:IPR004864); BEST Arabidopsis thaliana protein match is: un…	Late embryogenesis abundant protein, LEA-14	NO
AT1G17665	1.58172	-1.47864	0.00067857	0.00507887	UP		unknown protein; FUNCTIONS IN: molecular_function unknown; INVOLVED IN: biological_process unknown; LOCATED IN: endomembrane system; EXPRESSED IN: 15 plant structures; EXPRESSED DURING: 11 growth stages		NO
AT1G17690	0.397784	4.21176	0.00102889	0.00722562	UP		FUNCTIONS IN: molecular_function unknown; INVOLVED IN: biological_process unknown; LOCATED IN: nucleus; EXPRESSED IN: 24 plant structures; EXPRESSED DURING: 13 growth stages; CONTAINS InterPro DOMAIN/s: Digestive organ expansion factor, predicted (InterPro:IPR010678)	Digestive organ expansion factor, predicted | P-loop containing nucleoside triphosphate hydrolase	YES	1:6086818:A-AT;intronic_variant
AT1G17700	-0.781455	1.06971	0.00187498	0.0119469	DOWN	prenylated RAB acceptor 1.F1	prenylated RAB acceptor 1.F1 (PRA1.F1); CONTAINS InterPro DOMAIN/s: Prenylated rab acceptor PRA1 (InterPro:IPR004895); BEST Arabidopsis thaliana protein match is: PRA1 (Prenylated rab acceptor) family protein (TAIR:AT1G55190.1)	Prenylated rab acceptor PRA1	NO
AT1G17780	0.574423	4.63257	1.03435e-07	2.12039e-06	UP		unknown protein; BEST Arabidopsis thaliana protein match is: unknown protein (TAIR:AT2G16575.1)		NO
AT1G17940	0.528638	4.47468	1.20104e-05	0.000155228	UP	Endosomal targeting BRO1-like domain-containing protein	Endosomal targeting BRO1-like domain-containing protein; FUNCTIONS IN: molecular_function unknown; INVOLVED IN: N-terminal protein myristoylation; LOCATED IN: cellular_component unknown; CONTAINS InterPro DOMAIN/s: BRO1 (InterPro:IPR004328); BEST Arabidopsis thaliana protein match is: Endosomal targeting BRO1-like domain-containing protein (TAIR:AT1G73390.3)	BRO1 domain	NO
AT1G17960	0.729636	1.09035	0.00607999	0.0315872	UP	Threonyl-tRNA synthetase	Threonyl-tRNA synthetase; FUNCTIONS IN: nucleotide binding, aminoacyl-tRNA ligase activity, threonine-tRNA ligase activity, ATP binding; INVOLVED IN: threonyl-tRNA aminoacylation, translation, tRNA aminoacylation for protein translation; LOCATED IN: cytoplasm; EXPRESSED IN: inflorescence meristem, root, pedicel; EXPRESSED DURING: 4 anthesis; CONTAINS InterPro DOMAIN/s: Threonyl/alanyl tRNA synthe…	Aminoacyl-tRNA synthetase, class II | Aminoacyl-tRNA synthetase, class II (G/ H/ P/ S), conserved domain | Anticodon-binding | Beta-grasp domain | TGS | TGS-like | Threonine-tRNA ligase, class IIa | Threonyl/alanyl tRNA synthetase, class II-like, putative editing domain	YES	1:6181512:T-TG;intronic_variant
AT1G17970	0.896049	4.61076	5.09973e-13	2.55601e-11	UP	RING/U-box superfamily protein	RING/U-box superfamily protein; FUNCTIONS IN: zinc ion binding; EXPRESSED IN: 20 plant structures; EXPRESSED DURING: 13 growth stages; CONTAINS InterPro DOMAIN/s: Zinc finger, RING-type (InterPro:IPR001841), Zinc finger, C3HC4 RING-type (InterPro:IPR018957); BEST Arabidopsis thaliana protein match is: RING/U-box superfamily protein (TAIR:AT1G73760.1)	Zinc finger, RING-type | Zinc finger, RING/FYVE/PHD-type	NO
AT1G17980	0.620272	5.17928	2.24385e-08	5.27949e-07	UP	poly(A) polymerase 1	poly(A) polymerase 1 (PAPS1); CONTAINS InterPro DOMAIN/s: Poly(A) polymerase (InterPro:IPR014492), Poly(A) polymerase, central domain (InterPro:IPR007012), Nucleotidyltransferase, class I, C-terminal-like (InterPro:IPR011068), Nucleotidyl transferase domain (InterPro:IPR002934), Poly(A) polymerase, RNA-binding domain (InterPro:IPR007010); CONTAINS InterPro DOMAIN/s: Poly(A) polymerase (InterPro:I…	Nucleotidyl transferase domain | Nucleotidyltransferase, class I, C-terminal-like | Poly(A) polymerase | Poly(A) polymerase, RNA-binding domain | Poly(A) polymerase, central domain	NO
AT1G18000	0.727472	5.42849	4.82823e-09	1.29063e-07	UP	Major facilitator superfamily protein	Major facilitator superfamily protein; FUNCTIONS IN: molecular_function unknown; INVOLVED IN: transmembrane transport; LOCATED IN: cellular_component unknown; CONTAINS InterPro DOMAIN/s: Major facilitator superfamily MFS-1 (InterPro:IPR011701), Major facilitator superfamily, general substrate transporter (InterPro:IPR016196); BEST Arabidopsis thaliana protein match is: Major facilitator superfami…	Ion channel regulatory protein, UNC-93 | Major facilitator superfamily domain, general substrate transporter	NO
AT1G18020	1.25527	5.19934	3.87656e-06	5.66941e-05	UP	FMN-linked oxidoreductases superfamily protein	FMN-linked oxidoreductases superfamily protein; FUNCTIONS IN: oxidoreductase activity, FMN binding, catalytic activity; INVOLVED IN: metabolic process; CONTAINS InterPro DOMAIN/s: NADH:flavin oxidoreductase/NADH oxidase, N-terminal (InterPro:IPR001155), Aldolase-type TIM barrel (InterPro:IPR013785); BEST Arabidopsis thaliana protein match is: FMN-linked oxidoreductases superfamily protein (TAIR:A…	Aldolase-type TIM barrel | NADH:flavin oxidoreductase/NADH oxidase, N-terminal	NO
AT1G18030	0.849064	3.96347	7.61274e-08	1.60153e-06	UP	Protein phosphatase 2C family protein	Protein phosphatase 2C family protein; FUNCTIONS IN: protein serine/threonine phosphatase activity, catalytic activity; INVOLVED IN: biological_process unknown; LOCATED IN: cellular_component unknown; EXPRESSED IN: 22 plant structures; EXPRESSED DURING: 13 growth stages; CONTAINS InterPro DOMAIN/s: Protein phosphatase 2C-related (InterPro:IPR001932), Protein phosphatase 2C (InterPro:IPR015655), P…	Protein phosphatase 2C | Protein phosphatase 2C (PP2C)-like domain	NO
AT1G18060	-0.528917	6.38463	6.66056e-08	1.41984e-06	DOWN		unknown protein; INVOLVED IN: biological_process unknown; LOCATED IN: chloroplast; EXPRESSED IN: 22 plant structures; EXPRESSED DURING: 13 growth stages		NO
AT1G18090	0.858996	3.01652	3.40759e-08	7.7235e-07	UP	5'-3' exonuclease family protein	5'-3' exonuclease family protein; FUNCTIONS IN: DNA binding, catalytic activity, nuclease activity; INVOLVED IN: DNA repair; LOCATED IN: cellular_component unknown; EXPRESSED IN: 22 plant structures; EXPRESSED DURING: 14 growth stages; CONTAINS InterPro DOMAIN/s: XPG conserved site (InterPro:IPR019974), XPG N-terminal (InterPro:IPR006085), DNA repair protein (XPGC)/yeast Rad (InterPro:IPR006084),…	5'-3' exonuclease, C-terminal domain | Helix-hairpin-helix motif, class 2 | PIN domain-like | XPG N-terminal | XPG conserved site | XPG-I domain	NO
AT1G18100	0.669471	2.49222	0.000682934	0.00510473	UP	PEBP (phosphatidylethanolamine-binding protein) family protein	E12A11; CONTAINS InterPro DOMAIN/s: Phosphatidylethanolamine-binding, conserved site (InterPro:IPR001858), Phosphatidylethanolamine-binding protein PEBP (InterPro:IPR008914); BEST Arabidopsis thaliana protein match is: PEBP (phosphatidylethanolamine-binding protein) family protein (TAIR:AT5G03840.1)	Phosphatidylethanolamine-binding protein PEBP | Phosphatidylethanolamine-binding, conserved site	NO
AT1G18140	1.13424	-0.97713	0.00113087	0.00781633	UP	laccase 1	laccase 1 (LAC1); FUNCTIONS IN: laccase activity; INVOLVED IN: oxidation reduction, lignin catabolic process; LOCATED IN: endomembrane system, apoplast; EXPRESSED IN: 12 plant structures; EXPRESSED DURING: 6 growth stages; CONTAINS InterPro DOMAIN/s: Multicopper oxidase, type 3 (InterPro:IPR011707), Laccase (InterPro:IPR017761), Multicopper oxidase, type 2 (InterPro:IPR011706), Cupredoxin (InterP…	Cupredoxin | Laccase | Multicopper oxidase, copper-binding site | Multicopper oxidase, type 1 | Multicopper oxidase, type 2 | Multicopper oxidase, type 3	NO
AT1G18150	-0.263972	5.54714	0.00711427	0.0359029	DOWN	Protein kinase superfamily protein	ATMPK8; CONTAINS InterPro DOMAIN/s: Protein kinase, ATP binding site (InterPro:IPR017441), MAP kinase, conserved site (InterPro:IPR003527), Protein kinase, catalytic domain (InterPro:IPR000719), Serine/threonine-protein kinase domain (InterPro:IPR002290), Serine/threonine-protein kinase-like domain (InterPro:IPR017442), Protein kinase-like domain (InterPro:IPR011009); FUNCTIONS IN: MAP kinase act…	Mitogen-activated protein (MAP) kinase, conserved site | Protein kinase domain | Protein kinase, ATP binding site | Protein kinase-like domain | Serine/threonine/dual specificity protein kinase, catalytic domain	NO
AT1G18160	0.285556	5.91446	0.00207649	0.0129973	UP	Protein kinase superfamily protein	Protein kinase superfamily protein; FUNCTIONS IN: protein serine/threonine/tyrosine kinase activity, kinase activity; INVOLVED IN: protein amino acid phosphorylation; LOCATED IN: plasma membrane; EXPRESSED IN: 22 plant structures; EXPRESSED DURING: 13 growth stages; CONTAINS InterPro DOMAIN/s: Protein kinase, ATP binding site (InterPro:IPR017441), Serine/threonine-protein kinase domain (InterPro:…	Protein kinase domain | Protein kinase, ATP binding site | Protein kinase-like domain | Serine-threonine/tyrosine-protein kinase catalytic domain | Serine/threonine-protein kinase, active site	NO
AT1G18290	1.55987	-0.0061382	2.07222e-06	3.20158e-05	UP		unknown protein; FUNCTIONS IN: molecular_function unknown; INVOLVED IN: N-terminal protein myristoylation; LOCATED IN: chloroplast; EXPRESSED IN: root	Protein of unknown function DUF4228, plant	NO
AT1G18360	-0.366633	4.73105	0.00230996	0.0142026	DOWN	alpha/beta-Hydrolases superfamily protein	alpha/beta-Hydrolases superfamily protein; FUNCTIONS IN: hydrolase activity; LOCATED IN: chloroplast; EXPRESSED IN: 22 plant structures; EXPRESSED DURING: 13 growth stages; BEST Arabidopsis thaliana protein match is: alpha/beta-Hydrolases superfamily protein (TAIR:AT1G73480.1)	Alpha/Beta hydrolase fold | Putative lysophospholipase	NO
AT1G18450	0.376125	5.69528	0.000313661	0.00262796	UP	actin-related protein 4	actin-related protein 4 (ARP4); FUNCTIONS IN: structural constituent of cytoskeleton; INVOLVED IN: long-day photoperiodism, flowering, chromatin organization, pollen sperm cell differentiation; LOCATED IN: nucleolus, nucleus; EXPRESSED IN: 25 plant structures; EXPRESSED DURING: 14 growth stages; CONTAINS InterPro DOMAIN/s: Actin/actin-like (InterPro:IPR004000); BEST Arabidopsis thaliana protein m…	Actin-related protein | Actin-related protein 4 (Arp4)	NO
AT1G18460	-0.422646	6.13291	0.000138024	0.00130109	DOWN	alpha/beta-Hydrolases superfamily protein	alpha/beta-Hydrolases superfamily protein; FUNCTIONS IN: lipase activity; INVOLVED IN: glycerol biosynthetic process, lipid metabolic process; EXPRESSED IN: 23 plant structures; EXPRESSED DURING: 13 growth stages; CONTAINS InterPro DOMAIN/s: AB-hydrolase-associated lipase region (InterPro:IPR006693); BEST Arabidopsis thaliana protein match is: alpha/beta-Hydrolases superfamily protein (TAIR:AT1G7…	Alpha/Beta hydrolase fold | Partial AB-hydrolase lipase domain	NO
AT1G18470	0.362779	5.40807	0.000256082	0.0022127	UP	Transmembrane Fragile-X-F-associated protein	Transmembrane Fragile-X-F-associated protein; FUNCTIONS IN: zinc ion binding; LOCATED IN: endomembrane system; EXPRESSED IN: 24 plant structures; EXPRESSED DURING: 13 growth stages; CONTAINS InterPro DOMAIN/s: Transmembrane Fragile-X-F-associated protein (InterPro:IPR019396); CONTAINS InterPro DOMAIN/s: Transmembrane Fragile-X-F-associated protein (InterPro:IPR019396), Zinc finger, RING-type (Int…	Transmembrane Fragile-X-F-associated protein | Zinc finger, RING-type | Zinc finger, RING/FYVE/PHD-type	NO
AT1G18570	1.0886	4.06878	3.25561e-12	1.4409e-10	UP	myb domain protein 51	myb domain protein 51 (MYB51); CONTAINS InterPro DOMAIN/s: SANT, DNA-binding (InterPro:IPR001005), Homeodomain-like (InterPro:IPR009057), Myb, DNA-binding (InterPro:IPR014778), HTH transcriptional regulator, Myb-type, DNA-binding (InterPro:IPR017930), Homeodomain-related (InterPro:IPR012287), Myb transcription factor (InterPro:IPR015495); BEST Arabidopsis thaliana protein match is: myb domain pro…	Homeodomain-like | Myb domain | SANT/Myb domain	NO
AT1G18580	0.485209	3.91956	6.0332e-05	0.000638204	UP	galacturonosyltransferase 11	galacturonosyltransferase 11 (GAUT11); FUNCTIONS IN: polygalacturonate 4-alpha-galacturonosyltransferase activity; LOCATED IN: mitochondrion; EXPRESSED IN: 19 plant structures; EXPRESSED DURING: 12 growth stages; CONTAINS InterPro DOMAIN/s: Glycosyl transferase, family 8 (InterPro:IPR002495); BEST Arabidopsis thaliana protein match is: galacturonosyltransferase 10 (TAIR:AT2G20810.1)	Glycosyl transferase, family 8 | Nucleotide-diphospho-sugar transferases	NO
AT1G18620	0.318073	6.85867	0.00165891	0.0107864	UP		unknown protein; FUNCTIONS IN: molecular_function unknown; INVOLVED IN: biological_process unknown; LOCATED IN: cellular_component unknown; EXPRESSED IN: 22 plant structures; EXPRESSED DURING: 13 growth stages; BEST Arabidopsis thaliana protein match is: unknown protein (TAIR:AT1G74160.1)	Domain of unknown function DUF4378	NO
AT1G18660	-0.297948	6.05564	0.00197846	0.0125045	DOWN	zinc finger (C3HC4-type RING finger) family protein	zinc finger (C3HC4-type RING finger) family protein; FUNCTIONS IN: ATP-dependent peptidase activity, binding, zinc ion binding; INVOLVED IN: proteolysis; EXPRESSED IN: 22 plant structures; EXPRESSED DURING: 13 growth stages; CONTAINS InterPro DOMAIN/s: Peptidase S16, lon N-terminal (InterPro:IPR003111), Zinc finger, RING-type, conserved site (InterPro:IPR017907), Tetratricopeptide-like helical (I…	PUA-like domain | Peptidase S16, lon N-terminal | Tetratricopeptide-like helical domain | Zinc finger, RING-type | Zinc finger, RING-type, conserved site | Zinc finger, RING/FYVE/PHD-type	NO
AT1G18670	0.639614	4.69969	9.49924e-09	2.4165e-07	UP	Protein kinase superfamily protein	IMPAIRED IN BABA-INDUCED STERILITY 1 (IBS1); FUNCTIONS IN: protein serine/threonine kinase activity, protein kinase activity, kinase activity, ATP binding; INVOLVED IN: protein amino acid phosphorylation, N-terminal protein myristoylation; LOCATED IN: plasma membrane; EXPRESSED IN: 20 plant structures; EXPRESSED DURING: 13 growth stages; CONTAINS InterPro DOMAIN/s: Protein kinase, ATP binding sit…	Protein kinase domain | Protein kinase, ATP binding site | Protein kinase-like domain | Serine/threonine-protein kinase, active site | Serine/threonine/dual specificity protein kinase, catalytic domain	NO
AT1G18700	0.266639	5.52563	0.00879138	0.0428079	UP	DNAJ heat shock N-terminal domain-containing protein	DNAJ heat shock N-terminal domain-containing protein; FUNCTIONS IN: heat shock protein binding; INVOLVED IN: protein folding; LOCATED IN: endoplasmic reticulum; EXPRESSED IN: 24 plant structures; EXPRESSED IN: 25 plant structures; EXPRESSED DURING: 15 growth stages; CONTAINS InterPro DOMAIN/s: Molecular chaperone, heat shock protein, Hsp40, DnaJ (InterPro:IPR015609), Heat shock protein DnaJ, N-te…		NO
AT1G18710	0.46177	5.12208	0.00199237	0.0125665	UP	myb domain protein 47	myb domain protein 47 (MYB47); FUNCTIONS IN: DNA binding, sequence-specific DNA binding transcription factor activity; INVOLVED IN: response to jasmonic acid stimulus, response to salt stress, regulation of transcription, DNA-dependent; LOCATED IN: nucleus, cytoplasm; EXPRESSED IN: leaf lamina base, stem, leaf whorl, leaf; EXPRESSED DURING: LP.06 six leaves visible, LP.04 four leaves visible, LP.…	Homeodomain-like | Myb domain | SANT/Myb domain	NO
AT1G18730	-0.825286	6.59551	1.03015e-16	8.76177e-15	DOWN	NDH dependent flow 6	NDH dependent flow 6 (NDF6); FUNCTIONS IN: molecular_function unknown; INVOLVED IN: photosynthetic electron transport in photosystem I; LOCATED IN: chloroplast thylakoid membrane, chloroplast, NAD(P)H dehydrogenase complex (plastoquinone); EXPRESSED IN: 21 plant structures; EXPRESSED DURING: 13 growth stages		NO
AT1G18810	-1.76997	4.17709	6.67481e-23	1.24897e-20	DOWN	phytochrome kinase substrate-related	phytochrome kinase substrate-related; BEST Arabidopsis thaliana protein match is: phytochrome kinase substrate 1 (TAIR:AT2G02950.1)		NO
AT1G18830	1.10369	0.352436	0.00858379	0.0419914	UP	Transducin/WD40 repeat-like superfamily protein	Transducin/WD40 repeat-like superfamily protein; FUNCTIONS IN: nucleotide binding; LOCATED IN: endomembrane system; CONTAINS InterPro DOMAIN/s: WD40 repeat 2 (InterPro:IPR019782), WD40 repeat, conserved site (InterPro:IPR019775), WD40 repeat (InterPro:IPR001680), WD40 repeat-like-containing domain (InterPro:IPR011046), WD40-repeat-containing domain (InterPro:IPR017986), WD40/YVTN repeat-like-cont…	WD40 repeat | WD40 repeat, conserved site | WD40-repeat-containing domain | WD40/YVTN repeat-like-containing domain	NO
AT1G18880	0.742987	3.54039	1.53427e-05	0.000192501	UP	Major facilitator superfamily protein	Major facilitator superfamily protein; FUNCTIONS IN: transporter activity; INVOLVED IN: oligopeptide transport; LOCATED IN: membrane; EXPRESSED IN: 22 plant structures; EXPRESSED DURING: 13 growth stages; CONTAINS InterPro DOMAIN/s: Oligopeptide transporter (InterPro:IPR000109), Major facilitator superfamily, general substrate transporter (InterPro:IPR016196); BEST Arabidopsis thaliana protein ma…	Major facilitator superfamily domain, general substrate transporter | Proton-dependent oligopeptide transporter family	NO
AT1G18960	-3.54533	-3.29347	0.00135757	0.00908836	DOWN	myb-like HTH transcriptional regulator family protein	myb-like HTH transcriptional regulator family protein; FUNCTIONS IN: DNA binding, sequence-specific DNA binding transcription factor activity; INVOLVED IN: regulation of transcription, DNA-dependent, regulation of transcription; CONTAINS InterPro DOMAIN/s: SANT, DNA-binding (InterPro:IPR001005), Homeodomain-like (InterPro:IPR009057), Myb, DNA-binding (InterPro:IPR014778), HTH transcriptional regu…	Homeodomain-like | Myb domain | SANT/Myb domain	NO
AT1G18970	-2.17086	-2.9255	0.00473635	0.0257964	DOWN	germin-like protein 4	germin-like protein 4 (GLP4); FUNCTIONS IN: manganese ion binding, nutrient reservoir activity; LOCATED IN: endomembrane system, apoplast; EXPRESSED IN: root; CONTAINS InterPro DOMAIN/s: Cupin, RmlC-type (InterPro:IPR011051), Cupin 1 (InterPro:IPR006045), RmlC-like jelly roll fold (InterPro:IPR014710), Germin (InterPro:IPR001929), Germin, manganese binding site (InterPro:IPR019780); BEST Arabidop…	Cupin 1 | Germin | Germin, manganese binding site | RmlC-like cupin domain | RmlC-like jelly roll fold	NO
AT1G18990	3.8993	2.76066	3.26772e-55	6.47412e-52	UP	Protein of unknown function, DUF593	Protein of unknown function, DUF593; FUNCTIONS IN: molecular_function unknown; INVOLVED IN: biological_process unknown; LOCATED IN: endomembrane system; EXPRESSED IN: 9 plant structures; EXPRESSED DURING: L mature pollen stage, M germinated pollen stage, 4 anthesis, C globular stage, petal differentiation and expansion stage; CONTAINS InterPro DOMAIN/s: Protein of unknown function DUF593 (InterPr…	Zein-binding domain	NO
AT1G19010	0.46628	3.29978	0.00159682	0.0104554	UP		unknown protein; BEST Arabidopsis thaliana protein match is: unknown protein (TAIR:AT1G74860.1)		NO
AT1G19080	0.390159	3.63423	0.00396944	0.0223122	UP	GINS complex protein	TITAN 10 (TTN10); FUNCTIONS IN: molecular_function unknown; INVOLVED IN: DNA-dependent DNA replication, embryo development ending in seed dormancy; LOCATED IN: GINS complex; EXPRESSED IN: pollen tube; CONTAINS InterPro DOMAIN/s: GINS complex, subunit Psf3 (InterPro:IPR010492), GINS complex (InterPro:IPR021151); BEST Arabidopsis thaliana protein match is: GINS complex protein (TAIR:AT3G55490.1)	GINS complex | GINS complex, subunit Psf3	NO
AT1G19130	-0.390633	4.38966	0.000315785	0.00264444	DOWN		CONTAINS InterPro DOMAIN/s: Protein of unknown function DUF985 (InterPro:IPR009327), RmlC-like jelly roll fold (InterPro:IPR014710)	Protein of unknown function DUF985 | RmlC-like cupin domain | RmlC-like jelly roll fold	NO
AT1G19140	-0.326846	4.62002	0.0040518	0.0226655	DOWN		FUNCTIONS IN: molecular_function unknown; INVOLVED IN: ubiquinone biosynthetic process; LOCATED IN: mitochondrion; EXPRESSED IN: 24 plant structures; EXPRESSED DURING: 15 growth stages; CONTAINS InterPro DOMAIN/s: COQ9 (InterPro:IPR013718), Ubiquinone biosynthesis protein COQ9 (InterPro:IPR012762)	COQ9 | Ubiquinone biosynthesis protein COQ9	NO
AT1G19150	-0.598013	7.16798	5.74996e-10	1.7982e-08	DOWN	photosystem I light harvesting complex gene 6	photosystem I light harvesting complex gene 6 (LHCA6); FUNCTIONS IN: chlorophyll binding; INVOLVED IN: response to blue light, response to red light, response to far red light, photosynthesis; LOCATED IN: light-harvesting complex, chloroplast; EXPRESSED IN: 24 plant structures; EXPRESSED DURING: 13 growth stages; CONTAINS InterPro DOMAIN/s: Chlorophyll A-B binding protein (InterPro:IPR001344); BE…	Chlorophyll A-B binding protein | Chlorophyll A-B binding protein, plant | Chlorophyll a/b binding protein domain	NO
AT1G19180	0.676411	4.08106	0.00013307	0.00125974	UP	jasmonate-zim-domain protein 1	TIFY10A; jasmonate-zim-domain protein 1 (JAZ1); CONTAINS InterPro DOMAIN/s: Tify (InterPro:IPR010399), CCT domain-like (InterPro:IPR018467); BEST Arabidopsis thaliana protein match is: TIFY domain/Divergent CCT motif family protein (TAIR:AT1G74950.1)	CO/COL/TOC1, conserved site | Tify	NO
AT1G19190	0.783289	0.064631	0.00851601	0.0417022	UP	alpha/beta-Hydrolases superfamily protein	alpha/beta-Hydrolases superfamily protein; FUNCTIONS IN: hydrolase activity; INVOLVED IN: metabolic process; LOCATED IN: cellular_component unknown; EXPRESSED IN: inflorescence meristem, root, flower; EXPRESSED DURING: petal differentiation and expansion stage; CONTAINS InterPro DOMAIN/s: Lipase, GDXG, active site (InterPro:IPR002168), Alpha/beta hydrolase fold-3 (InterPro:IPR013094); BEST Arabid…	Alpha/Beta hydrolase fold | Alpha/beta hydrolase fold-3 | Lipase, GDXG, active site	NO
AT1G19220	0.599387	4.15125	5.52345e-06	7.77089e-05	UP	auxin response factor 19	auxin response factor 19 (ARF19); CONTAINS InterPro DOMAIN/s: Aux/IAA-ARF-dimerisation (InterPro:IPR011525), Transcriptional factor B3 (InterPro:IPR003340), AUX/IAA protein (InterPro:IPR003311), Auxin response factor (InterPro:IPR010525); BEST Arabidopsis thaliana protein match is: Transcriptional factor B3 family protein / auxin-responsive factor AUX/IAA-related (TAIR:AT5G20730.2)	AUX/IAA protein | Aux/IAA-ARF-dimerisation | Auxin response factor | B3 DNA binding domain | DNA-binding pseudobarrel domain	NO
AT1G19270	0.782702	4.05461	6.40925e-10	1.98427e-08	UP	DA1	DA1 (DA1); CONTAINS InterPro DOMAIN/s: Zinc finger, LIM-type (InterPro:IPR001781), Ubiquitin interacting motif (InterPro:IPR003903), Protein of unknown function DUF3633 (InterPro:IPR022087); BEST Arabidopsis thaliana protein match is: LIM domain-containing protein (TAIR:AT4G36860.1)	Protein DA1 like | Ubiquitin interacting motif | Zinc finger, LIM-type	NO
AT1G19310	0.356977	4.07713	0.00198635	0.0125403	UP	RING/U-box superfamily protein	RING/U-box superfamily protein; FUNCTIONS IN: zinc ion binding; EXPRESSED IN: 24 plant structures; EXPRESSED DURING: 15 growth stages; CONTAINS InterPro DOMAIN/s: Zinc finger, RING-type, conserved site (InterPro:IPR017907), Zinc finger, RING-type (InterPro:IPR001841), Zinc finger, C3HC4 RING-type (InterPro:IPR018957); BEST Arabidopsis thaliana protein match is: RING/U-box superfamily protein (TAI…	Zinc finger, RING-type | Zinc finger, RING-type, conserved site | Zinc finger, RING/FYVE/PHD-type	NO
AT1G19370	0.647437	3.53413	7.24556e-06	9.92023e-05	UP		unknown protein; LOCATED IN: endoplasmic reticulum; EXPRESSED IN: 22 plant structures; EXPRESSED DURING: 13 growth stages; BEST Arabidopsis thaliana protein match is: unknown protein (TAIR:AT1G75140.1)	WD40-repeat-containing domain	NO
AT1G19400	0.366762	7.12664	0.00146355	0.00969966	UP	Erythronate-4-phosphate dehydrogenase family protein	Erythronate-4-phosphate dehydrogenase family protein; BEST Arabidopsis thaliana protein match is: Erythronate-4-phosphate dehydrogenase family protein (TAIR:AT1G75180.3)		NO
AT1G19520	0.364293	4.46164	0.00172319	0.0111185	UP	pentatricopeptide (PPR) repeat-containing protein	NUCLEAR FUSION DEFECTIVE 5 (NFD5); EXPRESSED IN: 21 plant structures; EXPRESSED DURING: 13 growth stages; CONTAINS InterPro DOMAIN/s: Pentatricopeptide repeat (InterPro:IPR002885); BEST Arabidopsis thaliana protein match is: Tetratricopeptide repeat (TPR)-like superfamily protein (TAIR:AT1G01970.1)		NO
AT1G19540	0.880907	2.22724	0.0001724	0.0015719	UP	NmrA-like negative transcriptional regulator family protein	NmrA-like negative transcriptional regulator family protein; FUNCTIONS IN: binding, catalytic activity; INVOLVED IN: metabolic process; LOCATED IN: cellular_component unknown; EXPRESSED IN: 18 plant structures; EXPRESSED DURING: 11 growth stages; CONTAINS InterPro DOMAIN/s: NAD(P)-binding domain (InterPro:IPR016040), NmrA-like (InterPro:IPR008030); BEST Arabidopsis thaliana protein match is: NmrA…	NAD(P)-binding domain | NmrA-like domain	NO
AT1G19610	-1.04468	0.261996	0.00560516	0.0295767	DOWN	Arabidopsis defensin-like protein	PDF1.4; FUNCTIONS IN: molecular_function unknown; INVOLVED IN: defense response; LOCATED IN: endomembrane system; EXPRESSED IN: 13 plant structures; EXPRESSED DURING: 9 growth stages; CONTAINS InterPro DOMAIN/s: Gamma thionin (InterPro:IPR008176), Low-molecular-weight cysteine-rich family (InterPro:IPR020191), Knottin (InterPro:IPR003614); BEST Arabidopsis thaliana protein match is: plant defensi…	Gamma thionin | Knottin, scorpion toxin-like | Low-molecular-weight cysteine-rich family	NO
AT1G19640	-1.31002	-1.44482	0.00470292	0.0256398	DOWN	jasmonic acid carboxyl methyltransferase	jasmonic acid carboxyl methyltransferase (JMT); CONTAINS InterPro DOMAIN/s: SAM dependent carboxyl methyltransferase (InterPro:IPR005299); BEST Arabidopsis thaliana protein match is: S-adenosyl-L-methionine-dependent methyltransferases superfamily protein (TAIR:AT3G11480.1)	S-adenosyl-L-methionine-dependent methyltransferase-like | SAM dependent carboxyl methyltransferase	NO
AT1G19650	-0.655213	5.09795	4.76183e-11	1.78006e-09	DOWN	Sec14p-like phosphatidylinositol transfer family protein	Sec14p-like phosphatidylinositol transfer family protein; FUNCTIONS IN: phosphatidylinositol transporter activity, transporter activity; INVOLVED IN: transport; LOCATED IN: plasma membrane; EXPRESSED IN: 20 plant structures; EXPRESSED DURING: 15 growth stages; CONTAINS InterPro DOMAIN/s: Cellular retinaldehyde-binding/triple function, C-terminal (InterPro:IPR001251), Cellular retinaldehyde bindin…	CRAL-TRIO domain | CRAL/TRIO, N-terminal domain | Cellular retinaldehyde binding/alpha-tocopherol transport	YES	1:6799746:C-CT;exonic_variant
AT1G19670	-1.49796	3.42134	1.53691e-15	1.12777e-13	DOWN	chlorophyllase 1	chlorophyllase 1 (CLH1); FUNCTIONS IN: chlorophyllase activity; INVOLVED IN: response to jasmonic acid stimulus, chlorophyll catabolic process, jasmonic acid mediated signaling pathway, response to stress; LOCATED IN: vacuole; EXPRESSED IN: 21 plant structures; EXPRESSED DURING: 14 growth stages; CONTAINS InterPro DOMAIN/s: Chlorophyllase-like (InterPro:IPR010821), Chlorophyllase, chloroplast (In…	Alpha/Beta hydrolase fold | Chlorophyllase | Chlorophyllase, chloroplast	NO
AT1G19700	-0.30683	5.90148	0.00134044	0.00901148	DOWN	BEL1-like homeodomain 10	BEL1-like homeodomain 10 (BEL10); FUNCTIONS IN: DNA binding, sequence-specific DNA binding transcription factor activity; INVOLVED IN: regulation of transcription, DNA-dependent, regulation of transcription; LOCATED IN: nucleus; EXPRESSED IN: 20 plant structures; EXPRESSED DURING: 11 growth stages; CONTAINS InterPro DOMAIN/s: Homeobox (InterPro:IPR001356), Homeodomain-like (InterPro:IPR009057), P…	Homeobox KN domain | Homeobox domain | Homeodomain-like | POX domain	NO
AT1G19715	0.307548	6.99666	0.00643606	0.0330648	UP	Mannose-binding lectin superfamily protein	Mannose-binding lectin superfamily protein; FUNCTIONS IN: molecular_function unknown; INVOLVED IN: biological_process unknown; LOCATED IN: cellular_component unknown; EXPRESSED IN: 22 plant structures; EXPRESSED DURING: 13 growth stages; CONTAINS InterPro DOMAIN/s: Mannose-binding lectin (InterPro:IPR001229); BEST Arabidopsis thaliana protein match is: Mannose-binding lectin superfamily protein (…	Mannose-binding lectin	NO
AT1G19740	-0.262433	6.83695	0.0101715	0.0483946	DOWN	ATP-dependent protease La (LON) domain protein	ATP-dependent protease La (LON) domain protein; FUNCTIONS IN: ATP-dependent peptidase activity; INVOLVED IN: proteolysis; LOCATED IN: chloroplast; EXPRESSED IN: 22 plant structures; EXPRESSED DURING: 13 growth stages; CONTAINS InterPro DOMAIN/s: Peptidase S16, lon N-terminal (InterPro:IPR003111); BEST Arabidopsis thaliana protein match is: ATP-dependent protease La (LON) domain protein (TAIR:AT1G…	PUA-like domain | Peptidase S16, lon N-terminal	NO
AT1G19800	-0.500692	5.07529	7.63186e-07	1.30548e-05	DOWN	trigalactosyldiacylglycerol 1	trigalactosyldiacylglycerol 1 (TGD1); FUNCTIONS IN: lipid transporter activity; INVOLVED IN: lipid transport; LOCATED IN: chloroplast outer membrane, chloroplast, chloroplast inner membrane, chloroplast envelope; EXPRESSED IN: 22 plant structures; EXPRESSED DURING: 13 growth stages; CONTAINS InterPro DOMAIN/s: Protein of unknown function DUF140 (InterPro:IPR003453)	Permease domain	NO
AT1G19835	0.64417	6.38363	9.44325e-11	3.36214e-09	UP	Plant protein of unknown function (DUF869)	Plant protein of unknown function (DUF869); FUNCTIONS IN: molecular_function unknown; INVOLVED IN: biological_process unknown; EXPRESSED IN: 22 plant structures; LOCATED IN: plasma membrane; EXPRESSED DURING: 13 growth stages; CONTAINS InterPro DOMAIN/s: Protein of unknown function DUF869, plant (InterPro:IPR008587); BEST Arabidopsis thaliana protein match is: Plant protein of unknown function (D…	Filament-like plant protein	NO
AT1G19860	-0.329359	4.36951	0.00206888	0.0129641	DOWN	Zinc finger C-x8-C-x5-C-x3-H type family protein	Zinc finger C-x8-C-x5-C-x3-H type family protein; FUNCTIONS IN: zinc ion binding, nucleic acid binding; INVOLVED IN: biological_process unknown; EXPRESSED IN: 23 plant structures; EXPRESSED DURING: 13 growth stages; CONTAINS InterPro DOMAIN/s: Zinc finger, CCCH-type (InterPro:IPR000571); BEST Arabidopsis thaliana protein match is: Zinc finger C-x8-C-x5-C-x3-H type family protein (TAIR:AT5G66270.1)	Zinc finger, CCCH-type	NO
AT1G19870	0.256952	6.28012	0.00571695	0.0300441	UP	IQ-domain 32	IQ-domain 32 (iqd32); FUNCTIONS IN: calmodulin binding; INVOLVED IN: biological_process unknown; LOCATED IN: cytosol, nucleus, plasma membrane, chloroplast envelope; EXPRESSED IN: 24 plant structures; EXPRESSED DURING: 13 growth stages; CONTAINS InterPro DOMAIN/s: IQ calmodulin-binding region (InterPro:IPR000048); BEST Arabidopsis thaliana protein match is: IQ-domain 31 (TAIR:AT1G74690.1)	Domain of unknown function DUF4005 | IQ motif, EF-hand binding site	NO
AT1G19880	0.313904	5.47356	0.00105354	0.00736799	UP	Regulator of chromosome condensation (RCC1) family protein	Regulator of chromosome condensation (RCC1) family protein; CONTAINS InterPro DOMAIN/s: Regulator of chromosome condensation/beta-lactamase-inhibitor protein II (InterPro:IPR009091), Regulator of chromosome condensation, RCC1 (InterPro:IPR000408); BEST Arabidopsis thaliana protein match is: Regulator of chromosome condensation (RCC1) family protein (TAIR:AT5G63860.1)	Protein RCC2 | Regulator of chromosome condensation 1/beta-lactamase-inhibitor protein II | Regulator of chromosome condensation, RCC1	NO
AT1G19900	0.771152	2.18559	0.00685756	0.0348213	UP	glyoxal oxidase-related protein	glyoxal oxidase-related protein; FUNCTIONS IN: molecular_function unknown; INVOLVED IN: biological_process unknown; LOCATED IN: endomembrane system; EXPRESSED IN: root; CONTAINS InterPro DOMAIN/s: Galactose oxidase/kelch, beta-propeller (InterPro:IPR011043), Galactose oxidase, beta-propeller (InterPro:IPR015916), Immunoglobulin E-set (InterPro:IPR014756), Glyoxal oxidase, N-terminal (InterPro:IPR…	Domain of unknown function DUF1929 | Galactose oxidase, beta-propeller | Galactose oxidase/kelch, beta-propeller | Glyoxal oxidase, N-terminal | Immunoglobulin E-set | Immunoglobulin-like fold	NO
AT1G19920	-0.344631	6.59239	0.000226807	0.00198882	DOWN	Pseudouridine synthase/archaeosine transglycosylase-like family protein	APS2; FUNCTIONS IN: sulfate adenylyltransferase (ATP) activity; INVOLVED IN: sulfate assimilation; LOCATED IN: chloroplast; EXPRESSED IN: 25 plant structures; EXPRESSED DURING: 13 growth stages; CONTAINS InterPro DOMAIN/s: Rossmann-like alpha/beta/alpha sandwich fold (InterPro:IPR014729), Pseudouridine synthase/archaeosine transglycosylase-like (InterPro:IPR015947), Sulphate adenylyltransferase (…	ATP-sulfurylase PUA-like domain | PUA-like domain | Rossmann-like alpha/beta/alpha sandwich fold | Sulphate adenylyltransferase | Sulphate adenylyltransferase catalytic domain	NO
AT1G20010	0.513854	7.10074	1.89113e-05	0.00023145	UP	tubulin beta-5 chain	tubulin beta-5 chain (TUB5); FUNCTIONS IN: structural constituent of cytoskeleton; INVOLVED IN: microtubule-based process; LOCATED IN: tubulin complex, cell wall, plasma membrane, chloroplast, membrane; EXPRESSED IN: 24 plant structures; EXPRESSED DURING: 13 growth stages; CONTAINS InterPro DOMAIN/s: Beta tubulin (InterPro:IPR002453), Tubulin (InterPro:IPR000217), Tubulin/FtsZ, GTPase domain (Int…	Beta tubulin | Beta tubulin, autoregulation binding site | Tubulin | Tubulin, C-terminal | Tubulin, conserved site | Tubulin/FtsZ, 2-layer sandwich domain | Tubulin/FtsZ, C-terminal | Tubulin/FtsZ, GTPase domain	NO
AT1G20030	1.50568	3.71732	2.21564e-19	2.83745e-17	UP	Pathogenesis-related thaumatin superfamily protein	Pathogenesis-related thaumatin superfamily protein; CONTAINS InterPro DOMAIN/s: Thaumatin, conserved site (InterPro:IPR017949), Thaumatin, pathogenesis-related (InterPro:IPR001938); BEST Arabidopsis thaliana protein match is: Pathogenesis-related thaumatin superfamily protein (TAIR:AT1G75800.1)	Thaumatin | Thaumatin, conserved site	NO
AT1G20070	-1.75399	2.38095	9.86014e-14	5.5815e-12	DOWN		unknown protein; FUNCTIONS IN: molecular_function unknown; INVOLVED IN: biological_process unknown; LOCATED IN: chloroplast; EXPRESSED IN: 20 plant structures; EXPRESSED DURING: 11 growth stages		NO
AT1G20090	1.05854	5.98973	5.67855e-14	3.29757e-12	UP	RHO-related protein from plants 2	RHO-related protein from plants 2 (ROP2); CONTAINS InterPro DOMAIN/s: Small GTP-binding protein (InterPro:IPR005225), Ras GTPase (InterPro:IPR001806), Ras (InterPro:IPR013753), Ras small GTPase, Rab type (InterPro:IPR003579), Ras small GTPase, Ras type (InterPro:IPR003577), Small GTPase, Rho type (InterPro:IPR003578); BEST Arabidopsis thaliana protein match is: RAC-like GTP binding protein 5 (TAI…	P-loop containing nucleoside triphosphate hydrolase | Small GTP-binding protein domain | Small GTPase superfamily | Small GTPase superfamily, Rho type	NO
AT1G20100	-0.248437	5.87612	0.00646415	0.0331787	DOWN		unknown protein; FUNCTIONS IN: molecular_function unknown; INVOLVED IN: biological_process unknown; EXPRESSED IN: 24 plant structures; EXPRESSED DURING: 15 growth stages; BEST Arabidopsis thaliana protein match is: unknown protein (TAIR:AT1G75860.1)		NO
AT1G20110	0.240192	6.18302	0.00770303	0.0383512	UP	RING/FYVE/PHD zinc finger superfamily protein	RING/FYVE/PHD zinc finger superfamily protein; FUNCTIONS IN: phosphoinositide binding; INVOLVED IN: signal transduction; EXPRESSED IN: 24 plant structures; EXPRESSED DURING: 15 growth stages; CONTAINS InterPro DOMAIN/s: Zinc finger, FYVE-type (InterPro:IPR000306), Zinc finger, FYVE-related (InterPro:IPR017455), Zinc finger, FYVE/PHD-type (InterPro:IPR011011); BEST Arabidopsis thaliana protein mat…	FYVE zinc finger | Zinc finger, FYVE-related | Zinc finger, FYVE/PHD-type | Zinc finger, RING/FYVE/PHD-type	NO
AT1G20140	0.771652	2.91703	2.43823e-06	3.71929e-05	UP	SKP1-like 4	SKP1-like 4 (SK4); CONTAINS InterPro DOMAIN/s: E3 ubiquitin ligase, SCF complex, Skp subunit (InterPro:IPR016897), SKP1 component, dimerisation (InterPro:IPR016072), SKP1 component (InterPro:IPR001232), BTB/POZ fold (InterPro:IPR011333), SKP1 component, POZ (InterPro:IPR016073); BEST Arabidopsis thaliana protein match is: SKP1-like 3 (TAIR:AT2G25700.1)	BTB/POZ fold | E3 ubiquitin ligase, SCF complex, Skp subunit | SKP1 component | SKP1 component, POZ domain | SKP1 component, dimerisation	NO
AT1G20150	5.62461	-0.115619	1.65938e-25	3.93588e-23	UP	Subtilisin-like serine endopeptidase family protein	Subtilisin-like serine endopeptidase family protein; FUNCTIONS IN: identical protein binding, serine-type endopeptidase activity; INVOLVED IN: proteolysis, negative regulation of catalytic activity; LOCATED IN: endomembrane system; EXPRESSED IN: leaf whorl, sepal, root, flower, seed; EXPRESSED DURING: F mature embryo stage, petal differentiation and expansion stage, E expanded cotyledon stage; CO…	Peptidase S8, subtilisin, His-active site | Peptidase S8, subtilisin, Ser-active site | Peptidase S8, subtilisin-related | Peptidase S8/S53 domain | Protease-associated domain, PA | Proteinase inhibitor I9 | Proteinase inhibitor, propeptide	NO
AT1G20190	-0.684707	5.40733	3.269e-05	0.000376164	DOWN	expansin 11	expansin 11 (EXPA11); INVOLVED IN: plant-type cell wall modification involved in multidimensional cell growth, unidimensional cell growth, plant-type cell wall loosening; LOCATED IN: cell wall; EXPRESSED IN: 14 plant structures; EXPRESSED DURING: 9 growth stages; CONTAINS InterPro DOMAIN/s: Barwin-related endoglucanase (InterPro:IPR009009), Pollen allergen, N-terminal (InterPro:IPR014734), Expans…	Barwin-like endoglucanase | Expansin | Expansin, cellulose-binding-like domain | Expansin/Lol pI | Expansin/pollen allergen, DPBB domain | RlpA-like double-psi beta-barrel domain	NO
AT1G20330	1.09033	6.67992	1.2107e-12	5.77588e-11	UP	sterol methyltransferase 2	sterol methyltransferase 2 (SMT2); FUNCTIONS IN: S-adenosylmethionine-dependent methyltransferase activity; INVOLVED IN: xylem and phloem pattern formation, negative regulation of DNA endoreduplication, multidimensional cell growth, sterol biosynthetic process, pattern specification process; LOCATED IN: endoplasmic reticulum; EXPRESSED IN: 30 plant structures; EXPRESSED DURING: 14 growth stages; …	ERGosterol biosynthesis methyltransferase, plant | Methyltransferase type 11 | S-adenosyl-L-methionine-dependent methyltransferase-like | Sterol methyltransferase C-terminal	NO
AT1G20340	-0.348707	11.249	0.000185599	0.00167232	DOWN	Cupredoxin superfamily protein	DNA-DAMAGE-REPAIR/TOLERATION PROTEIN 112 (DRT112); FUNCTIONS IN: electron carrier activity, copper ion binding; INVOLVED IN: response to UV, response to chemical stimulus, copper ion homeostasis, negative regulation of translation, response to copper ion; LOCATED IN: thylakoid, thylakoid lumen, chloroplast thylakoid lumen, chloroplast stroma, chloroplast; EXPRESSED IN: 25 plant structures; EXPRES…	Blue (type 1) copper domain | Blue (type 1) copper protein, binding site | Blue (type 1) copper protein, plastocyanin-type | Cupredoxin | Plastocyanin	NO
AT1G20390	-0.30689	6.12836	0.00946208	0.0455067	DOWN	transposable element gene	gypsy-like retrotransposon family, has a 1.5e-251 P-value blast match to GB:AAD19359 polyprotein (gypsy_Ty3-element) (Sorghum bicolor)		NO
AT1G20440	0.351413	8.38395	0.00430061	0.0238121	UP	cold-regulated 47	cold-regulated 47 (COR47); CONTAINS InterPro DOMAIN/s: Dehydrin (InterPro:IPR000167); BEST Arabidopsis thaliana protein match is: Dehydrin family protein (TAIR:AT1G20450.1)	Dehydrin	NO
AT1G20470	-1.61387	1.64732	5.20905e-17	4.59283e-15	DOWN	SAUR-like auxin-responsive protein family	SAUR-like auxin-responsive protein family ; CONTAINS InterPro DOMAIN/s: Auxin responsive SAUR protein (InterPro:IPR003676); BEST Arabidopsis thaliana protein match is: SAUR-like auxin-responsive protein family (TAIR:AT1G76190.1)	Auxin-induced protein, ARG7	NO
AT1G20575	0.333455	4.07738	0.0061889	0.0320493	UP	Nucleotide-diphospho-sugar transferases superfamily protein	Nucleotide-diphospho-sugar transferases superfamily protein; CONTAINS InterPro DOMAIN/s: Glycosyl transferase, family 2 (InterPro:IPR001173); BEST Arabidopsis thaliana protein match is: Nucleotide-diphospho-sugar transferases superfamily protein (TAIR:AT2G39630.1)	Glycosyltransferase 2-like | Nucleotide-diphospho-sugar transferases	NO
AT1G20580	0.296545	5.18907	0.00308121	0.0180767	UP	Small nuclear ribonucleoprotein family protein	Small nuclear ribonucleoprotein family protein; FUNCTIONS IN: molecular_function unknown; LOCATED IN: nucleolus, nucleus, small nucleolar ribonucleoprotein complex; EXPRESSED IN: 22 plant structures; EXPRESSED DURING: 13 growth stages; CONTAINS InterPro DOMAIN/s: Like-Sm ribonucleoprotein (LSM) domain (InterPro:IPR001163), Like-Sm ribonucleoprotein (LSM) domain, eukaryotic/archaea-type (InterPro:…	Like-Sm (LSM) domain | Ribonucleoprotein LSM domain | Ribonucleoprotein LSM domain, eukaryotic/archaea-type | U6 snRNA-associated Sm-like protein LSm4/Small nuclear ribonucleoprotein Sm D1/D3	NO
AT1G20630	0.718724	6.16672	4.16821e-05	0.000464558	UP	catalase 1	catalase 1 (CAT1); FUNCTIONS IN: catalase activity, cobalt ion binding; INVOLVED IN: in 7 processes; LOCATED IN: mitochondrion, cytosolic ribosome, cell wall, peroxisome, chloroplast envelope; EXPRESSED IN: 26 plant structures; EXPRESSED DURING: 16 growth stages; CONTAINS InterPro DOMAIN/s: Catalase related subgroup (InterPro:IPR018028), Catalase (InterPro:IPR002226), Catalase-like domain, haem-d…	Catalase active site | Catalase core domain | Catalase haem-binding site | Catalase immune-responsive domain | Catalase, mono-functional, haem-containing | Catalase, mono-functional, haem-containing, clades 1 and 3 | Catalase-like domain	NO
AT1G20670	0.315307	4.59275	0.00276134	0.016496	UP	DNA-binding bromodomain-containing protein	DNA-binding bromodomain-containing protein; CONTAINS InterPro DOMAIN/s: Bromodomain, conserved site (InterPro:IPR018359), Bromodomain (InterPro:IPR001487); BEST Arabidopsis thaliana protein match is: DNA-binding bromodomain-containing protein (TAIR:AT1G76380.2)	Bromodomain | Bromodomain, conserved site	NO
AT1G20693	-0.430733	7.71732	0.000735567	0.00543265	DOWN	high mobility group B2	high mobility group B2 (HMGB2); FUNCTIONS IN: chromatin binding, structural constituent of chromatin, DNA binding, sequence-specific DNA binding transcription factor activity; INVOLVED IN: chromatin assembly or disassembly; LOCATED IN: chromatin; EXPRESSED IN: 23 plant structures; EXPRESSED DURING: 13 growth stages; CONTAINS InterPro DOMAIN/s: High mobility group, superfamily (InterPro:IPR009071)…	High mobility group box domain	NO
AT1G20760	0.466865	5.83167	3.27956e-07	6.04923e-06	UP	Calcium-binding EF hand family protein	Calcium-binding EF hand family protein; FUNCTIONS IN: calcium ion binding; LOCATED IN: plasma membrane; EXPRESSED IN: 24 plant structures; EXPRESSED DURING: 15 growth stages; CONTAINS InterPro DOMAIN/s: EF-HAND 2 (InterPro:IPR018249), EPS15 homology (EH) (InterPro:IPR000261), EF-hand-like domain (InterPro:IPR011992), Calcium-binding EF-hand (InterPro:IPR002048); BEST Arabidopsis thaliana protein …	EF-hand domain | EF-hand domain pair | EPS15 homology (EH)	NO
AT1G20780	0.836963	4.17444	2.23926e-06	3.43133e-05	UP	senescence-associated E3 ubiquitin ligase 1	senescence-associated E3 ubiquitin ligase 1 (SAUL1); FUNCTIONS IN: ubiquitin-protein ligase activity; INVOLVED IN: regulation of chlorophyll catabolic process, regulation of chlorophyll biosynthetic process, leaf senescence, regulation of abscisic acid biosynthetic process; LOCATED IN: plasma membrane; EXPRESSED IN: 9 plant structures; EXPRESSED DURING: 7 growth stages; CONTAINS InterPro DOMAIN/s…	Armadillo | Armadillo-like helical | Armadillo-type fold | U box domain | Zinc finger, RING/FYVE/PHD-type	NO
AT1G20810	-0.455019	5.47712	1.42977e-06	2.30743e-05	DOWN	FKBP-like peptidyl-prolyl cis-trans isomerase family protein	FKBP-like peptidyl-prolyl cis-trans isomerase family protein; FUNCTIONS IN: FK506 binding, peptidyl-prolyl cis-trans isomerase activity; INVOLVED IN: protein folding; LOCATED IN: thylakoid lumen, chloroplast thylakoid lumen, chloroplast; EXPRESSED IN: 21 plant structures; EXPRESSED DURING: 13 growth stages; CONTAINS InterPro DOMAIN/s: Peptidyl-prolyl cis-trans isomerase, FKBP-type (InterPro:IPR00…	Peptidyl-prolyl cis-trans isomerase, FKBP-type | Peptidyl-prolyl cis-trans isomerase, FKBP-type, domain	NO
AT1G20823	-0.672703	1.90435	0.00331552	0.0191972	DOWN	RING/U-box superfamily protein	RING/U-box superfamily protein; FUNCTIONS IN: zinc ion binding; INVOLVED IN: response to chitin; EXPRESSED IN: 22 plant structures; EXPRESSED DURING: 13 growth stages; CONTAINS InterPro DOMAIN/s: Zinc finger, RING-type (InterPro:IPR001841), Zinc finger, C3HC4 RING-type (InterPro:IPR018957); BEST Arabidopsis thaliana protein match is: RING/U-box superfamily protein (TAIR:AT1G76410.1)	Zinc finger, RING-type | Zinc finger, RING/FYVE/PHD-type	NO
AT1G20830	-0.439129	4.05394	0.000196359	0.00175706	DOWN	multiple chloroplast division site 1	MULTIPLE CHLOROPLAST DIVISION SITE 1 (MCD1); FUNCTIONS IN: molecular_function unknown; INVOLVED IN: chloroplast fission; LOCATED IN: chloroplast inner membrane, chloroplast envelope; EXPRESSED IN: 22 plant structures; EXPRESSED DURING: 13 growth stages		NO
AT1G20840	0.719585	4.42645	5.93316e-10	1.84861e-08	UP	tonoplast monosaccharide transporter1	tonoplast monosaccharide transporter1 (TMT1); FUNCTIONS IN: carbohydrate transmembrane transporter activity, sugar:hydrogen symporter activity, nucleoside transmembrane transporter activity; INVOLVED IN: in 6 processes; LOCATED IN: plant-type vacuole membrane, plasma membrane, vacuole, membrane; EXPRESSED IN: 30 plant structures; EXPRESSED DURING: 15 growth stages; CONTAINS InterPro DOMAIN/s: Sug…	General substrate transporter | Major facilitator superfamily domain | Major facilitator superfamily domain, general substrate transporter | Sugar transporter, conserved site | Sugar/inositol transporter	NO
AT1G20870	-0.923087	1.03235	0.000433011	0.00346692	DOWN	HSP20-like chaperones superfamily protein	HSP20-like chaperones superfamily protein; CONTAINS InterPro DOMAIN/s: HSP20-like chaperone (InterPro:IPR008978); BEST Arabidopsis thaliana protein match is: HSP20-like chaperones superfamily protein (TAIR:AT1G54850.1)		NO
AT1G20900	0.619889	2.75621	0.000600206	0.00456848	UP	Predicted AT-hook DNA-binding family protein	ESCAROLA (ESC); CONTAINS InterPro DOMAIN/s: Protein of unknown function DUF296 (InterPro:IPR005175), Predicted AT-hook DNA-binding (InterPro:IPR014476); BEST Arabidopsis thaliana protein match is: Predicted AT-hook DNA-binding family protein (TAIR:AT1G76500.1)	AT hook, DNA-binding motif | Domain of unknown function DUF296 | Predicted AT-hook DNA-binding	NO
AT1G20910	0.482479	3.92859	0.000233048	0.00203613	UP	ARID/BRIGHT DNA-binding domain-containing protein	ARID/BRIGHT DNA-binding domain-containing protein; FUNCTIONS IN: sequence-specific DNA binding transcription factor activity; INVOLVED IN: regulation of transcription; LOCATED IN: intracellular; EXPRESSED IN: 19 plant structures; EXPRESSED DURING: 7 growth stages; CONTAINS InterPro DOMAIN/s: Heat shock protein Hsp20 (InterPro:IPR002068), HSP20-like chaperone (InterPro:IPR008978), ARID/BRIGHT DNA-…	ARID/BRIGHT DNA-binding domain | Alpha crystallin/Hsp20 domain | HSP20-like chaperone	NO
AT1G20950	-0.272158	5.09531	0.00847942	0.0415645	DOWN	Phosphofructokinase family protein	Phosphofructokinase family protein; FUNCTIONS IN: diphosphate-fructose-6-phosphate 1-phosphotransferase activity; INVOLVED IN: response to fructose stimulus, response to sucrose stimulus, photosynthesis, response to glucose stimulus; LOCATED IN: pyrophosphate-dependent phosphofructokinase complex, alpha-subunit complex; EXPRESSED IN: 23 plant structures; EXPRESSED DURING: 13 growth stages; CONTAI…	Phosphofructokinase domain | Pyrophosphate-dependent phosphofructokinase PfpB | Pyrophosphate-dependent phosphofructokinase, alpha-helical domain	NO
AT1G20970	0.577253	6.09817	2.55421e-07	4.82221e-06	UP		FUNCTIONS IN: molecular_function unknown; INVOLVED IN: biological_process unknown; LOCATED IN: plasma membrane, vacuole; EXPRESSED IN: guard cell, cultured cell; BEST Arabidopsis thaliana protein match is: proton pump interactor 1 (TAIR:AT4G27500.1)		NO
AT1G21010	-0.439917	4.14809	0.00798252	0.0395265	DOWN		unknown protein; FUNCTIONS IN: molecular_function unknown; INVOLVED IN: N-terminal protein myristoylation; LOCATED IN: cellular_component unknown; EXPRESSED IN: 24 plant structures; EXPRESSED DURING: 14 growth stages; BEST Arabidopsis thaliana protein match is: unknown protein (TAIR:AT1G76600.1)	Protein of unknown function DUF4228, plant	NO
AT1G21050	-0.774156	4.09343	1.60988e-08	3.90932e-07	DOWN	Protein of unknown function, DUF617	Protein of unknown function, DUF617; CONTAINS InterPro DOMAIN/s: Protein of unknown function DUF617, plant (InterPro:IPR006460); BEST Arabidopsis thaliana protein match is: Protein of unknown function, DUF617 (TAIR:AT1G76610.1)		NO
AT1G21110	-0.744899	1.637	0.00733427	0.0367981	DOWN	O-methyltransferase family protein	O-methyltransferase family protein; FUNCTIONS IN: methyltransferase activity, O-methyltransferase activity, protein dimerization activity; LOCATED IN: cytosol; CONTAINS InterPro DOMAIN/s: Winged helix-turn-helix transcription repressor DNA-binding (InterPro:IPR011991), Plant methyltransferase dimerisation (InterPro:IPR012967), O-methyltransferase, family 2 (InterPro:IPR001077), O-methyltransferas…	Caffeate O-methyltransferase (COMT) family | O-methyltransferase, family 2 | Plant methyltransferase dimerisation | S-adenosyl-L-methionine-dependent methyltransferase-like | Winged helix-turn-helix DNA-binding domain	NO
AT1G21120	-1.87145	-0.654327	1.16769e-05	0.000151439	DOWN	O-methyltransferase family protein	O-methyltransferase family protein; FUNCTIONS IN: methyltransferase activity, O-methyltransferase activity, protein dimerization activity; LOCATED IN: cytosol; EXPRESSED IN: 9 plant structures; EXPRESSED DURING: LP.04 four leaves visible, LP.10 ten leaves visible, LP.08 eight leaves visible; CONTAINS InterPro DOMAIN/s: Winged helix-turn-helix transcription repressor DNA-binding (InterPro:IPR01199…		NO
AT1G21130	0.635373	8.01539	5.91593e-07	1.03294e-05	UP	O-methyltransferase family protein	O-methyltransferase family protein; FUNCTIONS IN: methyltransferase activity, protein dimerization activity, O-methyltransferase activity; LOCATED IN: cytosol; EXPRESSED IN: 15 plant structures; EXPRESSED DURING: 9 growth stages; CONTAINS InterPro DOMAIN/s: Winged helix-turn-helix transcription repressor DNA-binding (InterPro:IPR011991), Plant methyltransferase dimerisation (InterPro:IPR012967), …	Caffeate O-methyltransferase (COMT) family | O-methyltransferase, family 2 | Plant methyltransferase dimerisation | S-adenosyl-L-methionine-dependent methyltransferase-like | Winged helix-turn-helix DNA-binding domain	NO
AT1G21150	-0.894151	1.54948	0.000588954	0.00450319	DOWN	Mitochondrial transcription termination factor family protein	Mitochondrial transcription termination factor family protein; CONTAINS InterPro DOMAIN/s: Mitochodrial transcription termination factor-related (InterPro:IPR003690); BEST Arabidopsis thaliana protein match is: Mitochondrial transcription termination factor family protein (TAIR:AT5G07900.1)		NO
AT1G21350	-0.938188	5.37074	8.31975e-22	1.38038e-19	DOWN	Thioredoxin superfamily protein	Thioredoxin superfamily protein; FUNCTIONS IN: oxidoreductase activity, antioxidant activity; INVOLVED IN: cell redox homeostasis; LOCATED IN: chloroplast; EXPRESSED IN: 22 plant structures; CONTAINS InterPro DOMAIN/s: Thioredoxin fold (InterPro:IPR012335), Alkyl hydroperoxide reductase/ Thiol specific antioxidant/ Mal allergen (InterPro:IPR000866), Thioredoxin-like fold (InterPro:IPR012336); EXP…	Alkyl hydroperoxide reductase subunit C/ Thiol specific antioxidant | Thioredoxin-like fold	NO
AT1G21360	0.880443	2.41794	0.00104001	0.00729095	UP	glycolipid transfer protein 2	glycolipid transfer protein 2 (GLTP2); FUNCTIONS IN: glycolipid transporter activity, glycolipid binding; INVOLVED IN: glycolipid transport; LOCATED IN: cytoplasm; CONTAINS InterPro DOMAIN/s: Glycolipid transfer protein, GLTP (InterPro:IPR014830); BEST Arabidopsis thaliana protein match is: Glycolipid transfer protein (GLTP) family protein (TAIR:AT3G21260.3)	Glycolipid transfer protein domain	NO
AT1G21400	0.446409	8.13459	0.00075866	0.00557913	UP	Thiamin diphosphate-binding fold (THDP-binding) superfamily protein	Thiamin diphosphate-binding fold (THDP-binding) superfamily protein; FUNCTIONS IN: oxidoreductase activity, acting on the aldehyde or oxo group of donors, disulfide as acceptor, 3-methyl-2-oxobutanoate dehydrogenase (2-methylpropanoyl-transferring) activity; INVOLVED IN: metabolic process; EXPRESSED IN: guard cell; CONTAINS InterPro DOMAIN/s: Dehydrogenase, E1 component (InterPro:IPR001017); BEST…		NO
AT1G21500	-0.386832	7.76267	2.19072e-05	0.000263802	DOWN		unknown protein		NO
AT1G21550	1.49233	1.79531	0.00202406	0.0127401	UP	Calcium-binding EF-hand family protein	Calcium-binding EF-hand family protein; FUNCTIONS IN: calcium ion binding; INVOLVED IN: biological_process unknown; LOCATED IN: cellular_component unknown; EXPRESSED IN: 14 plant structures; EXPRESSED DURING: 8 growth stages; CONTAINS InterPro DOMAIN/s: EF-Hand 1, calcium-binding site (InterPro:IPR018247), EF-HAND 2 (InterPro:IPR018249), EF-hand-like domain (InterPro:IPR011992), Calcium-binding E…	EF-Hand 1, calcium-binding site | EF-hand domain | EF-hand domain pair	NO
AT1G21560	-0.39267	4.24966	0.0017629	0.01134	DOWN		unknown protein; FUNCTIONS IN: molecular_function unknown; INVOLVED IN: biological_process unknown; LOCATED IN: cellular_component unknown; EXPRESSED IN: 22 plant structures; EXPRESSED DURING: 13 growth stages; BEST Arabidopsis thaliana protein match is: unknown protein (TAIR:AT4G01170.1)		NO
AT1G21590	-0.835442	6.74285	1.95298e-08	4.63228e-07	DOWN	Protein kinase protein with adenine nucleotide alpha hydrolases-like domain	Protein kinase protein with adenine nucleotide alpha hydrolases-like domain; FUNCTIONS IN: protein serine/threonine kinase activity, protein kinase activity, kinase activity, ATP binding; INVOLVED IN: protein amino acid phosphorylation, response to stress; LOCATED IN: cellular_component unknown; EXPRESSED IN: 22 plant structures; EXPRESSED DURING: 13 growth stages; CONTAINS InterPro DOMAIN/s: Usp…	Concanavalin A-like lectin/glucanase, subgroup | Protein kinase domain | Protein kinase, ATP binding site | Protein kinase-like domain | Rossmann-like alpha/beta/alpha sandwich fold | Serine/threonine-protein kinase, active site | UspA	NO
AT1G21600	0.253038	6.37173	0.0104245	0.0493822	UP	plastid transcriptionally active 6	plastid transcriptionally active 6 (PTAC6); FUNCTIONS IN: molecular_function unknown; INVOLVED IN: positive regulation of transcription, DNA-dependent, transcription from plastid promoter; LOCATED IN: plastid chromosome, chloroplast, nucleoid; LOCATED IN: plastid chromosome, nucleoid; EXPRESSED IN: 22 plant structures; EXPRESSED DURING: 13 growth stages		NO
AT1G21610	0.458265	5.31421	3.32514e-06	4.93056e-05	UP	wound-responsive family protein	wound-responsive family protein; FUNCTIONS IN: molecular_function unknown; INVOLVED IN: response to wounding; LOCATED IN: cellular_component unknown; EXPRESSED IN: 24 plant structures; EXPRESSED DURING: 14 growth stages; BEST Arabidopsis thaliana protein match is: unknown protein (TAIR:AT1G77310.1)	Hpc2-related domain | Ubinuclein/Yemanuclein	NO
AT1G21630	0.24914	6.60591	0.00934367	0.0450221	UP	Calcium-binding EF hand family protein	Calcium-binding EF hand family protein; FUNCTIONS IN: calcium ion binding; LOCATED IN: cytosol; LOCATED IN: cytosol, plasma membrane; EXPRESSED IN: 24 plant structures; EXPRESSED IN: 25 plant structures; EXPRESSED DURING: 15 growth stages; CONTAINS InterPro DOMAIN/s: EF-HAND 2 (InterPro:IPR018249), EPS15 homology (EH) (InterPro:IPR000261), Calcium-binding EF-hand (InterPro:IPR002048), EF-hand-lik…	EF-hand domain | EF-hand domain pair | EPS15 homology (EH)	NO
AT1G21651	0.477053	3.78943	0.000199257	0.00177968	UP	zinc ion binding	zinc ion binding; FUNCTIONS IN: zinc ion binding; INVOLVED IN: biological_process unknown; LOCATED IN: cellular_component unknown; CONTAINS InterPro DOMAIN/s: WD40 repeat 2 (InterPro:IPR019782), Zinc finger, RING-type (InterPro:IPR001841), WD40 repeat (InterPro:IPR001680), G-protein beta WD-40 repeat, region (InterPro:IPR020472), WD40 repeat-like-containing domain (InterPro:IPR011046), WD40-repea…	G-protein beta WD-40 repeat | Protein kinase-like domain | WD40 repeat | WD40-repeat-containing domain | WD40/YVTN repeat-like-containing domain | Zinc finger, RING-type | Zinc finger, RING/FYVE/PHD-type	NO
AT1G21670	0.853456	5.74499	5.91133e-13	2.94091e-11	UP		LOCATED IN: cell wall, plant-type cell wall; EXPRESSED IN: 23 plant structures; EXPRESSED DURING: 14 growth stages; CONTAINS InterPro DOMAIN/s: WD40-like Beta Propeller (InterPro:IPR011659), Six-bladed beta-propeller, TolB-like (InterPro:IPR011042); BEST Arabidopsis thaliana protein match is: DPP6 N-terminal domain-like protein (TAIR:AT1G21680.1)	WD40-like Beta Propeller | WD40/YVTN repeat-like-containing domain	NO
AT1G21680	0.503826	7.56665	9.0447e-05	0.000908272	UP	DPP6 N-terminal domain-like protein	DPP6 N-terminal domain-like protein; FUNCTIONS IN: molecular_function unknown; INVOLVED IN: biological_process unknown; LOCATED IN: plasma membrane, vacuole, plant-type cell wall; EXPRESSED IN: 25 plant structures; EXPRESSED DURING: 13 growth stages; CONTAINS InterPro DOMAIN/s: WD40-like Beta Propeller (InterPro:IPR011659), Six-bladed beta-propeller, TolB-like (InterPro:IPR011042); BEST Arabidops…	WD40-like Beta Propeller | WD40/YVTN repeat-like-containing domain	NO
AT1G21710	0.459032	3.81084	0.000304429	0.00256209	UP	8-oxoguanine-DNA glycosylase 1	8-oxoguanine-DNA glycosylase 1 (OGG1); FUNCTIONS IN: oxidized purine base lesion DNA N-glycosylase activity; INVOLVED IN: DNA repair, base-excision repair; LOCATED IN: chloroplast; EXPRESSED IN: 22 plant structures; EXPRESSED DURING: 14 growth stages; CONTAINS InterPro DOMAIN/s: DNA glycosylase (InterPro:IPR011257), Helix-hairpin-helix DNA-binding motif, class 1 (InterPro:IPR003583), Transcriptio…	8-oxoguanine DNA glycosylase, N-terminal | DNA glycosylase | Helix-hairpin-helix DNA-binding motif, class 1 | Helix-turn-helix, base-excision DNA repair, C-terminal | HhH-GPD domain	NO
AT1G21770	0.393071	5.90037	2.52196e-05	0.000298987	UP	Acyl-CoA N-acyltransferases (NAT) superfamily protein	Acyl-CoA N-acyltransferases (NAT) superfamily protein; FUNCTIONS IN: molecular_function unknown; INVOLVED IN: biological_process unknown; LOCATED IN: peroxisome; EXPRESSED IN: 22 plant structures; EXPRESSED DURING: 13 growth stages; CONTAINS InterPro DOMAIN/s: Acyl-CoA N-acyltransferase (InterPro:IPR016181); BEST Arabidopsis thaliana protein match is: Acyl-CoA N-acyltransferases (NAT) superfamily…	Acyl-CoA N-acyltransferase	NO
AT1G21910	3.284	5.40995	1.92207e-09	5.49087e-08	UP	Integrase-type DNA-binding superfamily protein	Integrase-type DNA-binding superfamily protein; FUNCTIONS IN: DNA binding, sequence-specific DNA binding transcription factor activity; INVOLVED IN: regulation of transcription, DNA-dependent; LOCATED IN: nucleus, chloroplast; EXPRESSED IN: 22 plant structures; EXPRESSED DURING: 13 growth stages; CONTAINS InterPro DOMAIN/s: DNA-binding, integrase-type (InterPro:IPR016177), Pathogenesis-related tr…	AP2/ERF domain | DNA-binding domain	NO
AT1G22020	0.364294	5.07435	0.000203284	0.0018111	UP	serine hydroxymethyltransferase 6	serine hydroxymethyltransferase 6 (SHM6); FUNCTIONS IN: pyridoxal phosphate binding, glycine hydroxymethyltransferase activity, catalytic activity; INVOLVED IN: glycine metabolic process, L-serine metabolic process; LOCATED IN: cellular_component unknown; EXPRESSED IN: 23 plant structures; EXPRESSED DURING: 15 growth stages; CONTAINS InterPro DOMAIN/s: Pyridoxal phosphate-dependent transferase, m…	Pyridoxal phosphate-dependent transferase | Pyridoxal phosphate-dependent transferase, major region, subdomain 1 | Pyridoxal phosphate-dependent transferase, major region, subdomain 2 | Serine hydroxymethyltransferase | Serine hydroxymethyltransferase, pyridoxal phosphate binding site	NO
AT1G22040	0.318152	4.58862	0.00273867	0.0163752	UP	Galactose oxidase/kelch repeat superfamily protein	Galactose oxidase/kelch repeat superfamily protein; FUNCTIONS IN: molecular_function unknown; INVOLVED IN: N-terminal protein myristoylation; LOCATED IN: chloroplast; EXPRESSED IN: 23 plant structures; EXPRESSED DURING: 13 growth stages; CONTAINS InterPro DOMAIN/s: F-box domain, cyclin-like (InterPro:IPR001810), Galactose oxidase/kelch, beta-propeller (InterPro:IPR011043), Kelch repeat type 1 (In…	F-box domain | Galactose oxidase, beta-propeller | Kelch repeat type 1	NO
AT1G22065	0.720004	2.18461	0.000185493	0.00167182	UP		unknown protein; FUNCTIONS IN: molecular_function unknown; INVOLVED IN: biological_process unknown; LOCATED IN: cellular_component unknown; BEST Arabidopsis thaliana protein match is: unknown protein (TAIR:AT1G77885.1)		NO
AT1G22140	-0.44286	4.40597	9.60044e-05	0.000956859	DOWN		unknown protein		NO
AT1G22160	-0.43112	4.51391	0.00741283	0.0371093	DOWN	Protein of unknown function (DUF581)	Protein of unknown function (DUF581); CONTAINS InterPro DOMAIN/s: Protein of unknown function DUF581 (InterPro:IPR007650); BEST Arabidopsis thaliana protein match is: Protein of unknown function (DUF581) (TAIR:AT1G78020.1)	zf-FLZ domain	NO
AT1G22180	0.54998	3.5097	1.62018e-05	0.000201512	UP	Sec14p-like phosphatidylinositol transfer family protein	Sec14p-like phosphatidylinositol transfer family protein; CONTAINS InterPro DOMAIN/s: Cellular retinaldehyde-binding/triple function, C-terminal (InterPro:IPR001251); CONTAINS InterPro DOMAIN/s: Cellular retinaldehyde-binding/triple function, C-terminal (InterPro:IPR001251), Cellular retinaldehyde-binding/triple function, N-terminal (InterPro:IPR008273), Phosphatidylinositol transfer protein-like…	CRAL-TRIO domain | CRAL/TRIO, N-terminal domain	NO
AT1G22190	0.995942	6.22282	1.83512e-07	3.56238e-06	UP	Integrase-type DNA-binding superfamily protein	Integrase-type DNA-binding superfamily protein; FUNCTIONS IN: DNA binding, sequence-specific DNA binding transcription factor activity; INVOLVED IN: regulation of transcription, DNA-dependent; LOCATED IN: nucleus; EXPRESSED IN: 22 plant structures; EXPRESSED DURING: 13 growth stages; CONTAINS InterPro DOMAIN/s: DNA-binding, integrase-type (InterPro:IPR016177), Pathogenesis-related transcriptional…	AP2/ERF domain | DNA-binding domain	NO
AT1G22230	0.708203	0.402393	0.010149	0.0483159	UP		unknown protein; LOCATED IN: chloroplast; BEST Arabidopsis thaliana protein match is: unknown protein (TAIR:AT1G78110.1)		NO
AT1G22260	-0.912999	-0.281726	0.00488475	0.0264677	DOWN	Myosin heavy chain-related protein	ZYP1a; BEST Arabidopsis thaliana protein match is: Myosin heavy chain-related protein (TAIR:AT1G22275.1)		NO
AT1G22270	0.414411	3.89785	0.00101648	0.00715039	UP	Trm112p-like protein	Trm112p-like protein; CONTAINS InterPro DOMAIN/s: Protein of unknown function DUF343 (InterPro:IPR005651); BEST Arabidopsis thaliana protein match is: Trm112p-like protein (TAIR:AT1G78190.1)	Uncharacterised protein family UPF0434/Trm112	NO
AT1G22280	0.304544	4.93225	0.00918606	0.0443892	UP	phytochrome-associated protein phosphatase type 2C	phytochrome-associated protein phosphatase type 2C; phytochrome-associated protein phosphatase type 2C (PAPP2C); CONTAINS InterPro DOMAIN/s: Protein phosphatase 2C-related (InterPro:IPR001932), Protein phosphatase 2C (InterPro:IPR015655), Protein phosphatase 2C, N-terminal (InterPro:IPR014045); FUNCTIONS IN: protein serine/threonine phosphatase activity, phosphoprotein phosphatase activity; BEST …	Protein phosphatase 2C | Protein phosphatase 2C (PP2C)-like domain	NO
AT1G22310	-0.380193	3.93924	0.00119575	0.00817746	DOWN	methyl-CPG-binding domain 8	methyl-CPG-binding domain 8 (MBD8); FUNCTIONS IN: methyl-CpG binding; INVOLVED IN: biological_process unknown; LOCATED IN: nucleus; EXPRESSED IN: 23 plant structures; EXPRESSED DURING: 13 growth stages; CONTAINS InterPro DOMAIN/s: A.T hook-like (InterPro:IPR020478), AT hook, DNA-binding motif (InterPro:IPR017956), DNA-binding, integrase-type (InterPro:IPR016177), Methyl-CpG DNA binding (InterPro:…	AT hook, DNA-binding motif | DNA-binding domain | Methyl-CpG DNA binding	YES	1:7883361:G-A;protein_coding;missense;CCT>CTT;P>L
AT1G22330	1.80801	3.69117	6.72686e-13	3.33678e-11	UP	RNA-binding (RRM/RBD/RNP motifs) family protein	RNA-binding (RRM/RBD/RNP motifs) family protein; FUNCTIONS IN: RNA binding, nucleotide binding, nucleic acid binding; INVOLVED IN: biological_process unknown; LOCATED IN: cellular_component unknown; EXPRESSED IN: 20 plant structures; EXPRESSED DURING: 13 growth stages; CONTAINS InterPro DOMAIN/s: RNA recognition motif, RNP-1 (InterPro:IPR000504), Nucleotide-binding, alpha-beta plait (InterPro:IPR…	Nucleotide-binding, alpha-beta plait | RNA recognition motif domain	NO
AT1G22360	1.34039	5.62822	1.18419e-09	3.52962e-08	UP	UDP-glucosyl transferase 85A2	UDP-glucosyl transferase 85A2 (UGT85A2); FUNCTIONS IN: UDP-glycosyltransferase activity, transferase activity, transferring glycosyl groups, glucuronosyltransferase activity; INVOLVED IN: metabolic process; LOCATED IN: cellular_component unknown; EXPRESSED IN: 21 plant structures; EXPRESSED DURING: 11 growth stages; CONTAINS InterPro DOMAIN/s: UDP-glucuronosyl/UDP-glucosyltransferase (InterPro:IP…	UDP-glucuronosyl/UDP-glucosyltransferase	NO
AT1G22370	1.11458	5.43933	5.22614e-25	1.19743e-22	UP	UDP-glucosyl transferase 85A5	UDP-glucosyl transferase 85A5 (UGT85A5); FUNCTIONS IN: transferase activity, transferring glycosyl groups, glucuronosyltransferase activity; INVOLVED IN: metabolic process; EXPRESSED IN: 15 plant structures; EXPRESSED DURING: 9 growth stages; CONTAINS InterPro DOMAIN/s: UDP-glucuronosyl/UDP-glucosyltransferase (InterPro:IPR002213); BEST Arabidopsis thaliana protein match is: UDP-glucosyl transfer…	UDP-glucuronosyl/UDP-glucosyltransferase	NO
AT1G22380	2.21385	0.381564	3.82222e-16	2.99386e-14	UP	UDP-glucosyl transferase 85A3	UDP-glucosyl transferase 85A3 (UGT85A3); FUNCTIONS IN: transferase activity, transferring glycosyl groups, glucuronosyltransferase activity; INVOLVED IN: metabolic process; LOCATED IN: cellular_component unknown; EXPRESSED IN: 19 plant structures; EXPRESSED DURING: 9 growth stages; CONTAINS InterPro DOMAIN/s: UDP-glucuronosyl/UDP-glucosyltransferase (InterPro:IPR002213); BEST Arabidopsis thaliana…	UDP-glucuronosyl/UDP-glucosyltransferase	NO
AT1G22400	0.951044	3.4884	0.00115583	0.00795256	UP	UDP-Glycosyltransferase superfamily protein	UGT85A1; FUNCTIONS IN: in 6 functions; INVOLVED IN: metabolic process; LOCATED IN: cellular_component unknown; EXPRESSED IN: 22 plant structures; EXPRESSED DURING: 10 growth stages; CONTAINS InterPro DOMAIN/s: UDP-glucuronosyl/UDP-glucosyltransferase (InterPro:IPR002213); BEST Arabidopsis thaliana protein match is: UDP-glucosyl transferase 85A3 (TAIR:AT1G22380.1)	UDP-glucuronosyl/UDP-glucosyltransferase	NO
AT1G22430	-0.345647	6.75946	0.000737378	0.00544164	DOWN	GroES-like zinc-binding dehydrogenase family protein	GroES-like zinc-binding dehydrogenase family protein; FUNCTIONS IN: oxidoreductase activity, zinc ion binding; INVOLVED IN: oxidation reduction; LOCATED IN: cellular_component unknown; EXPRESSED IN: 21 plant structures; EXPRESSED DURING: 13 growth stages; CONTAINS InterPro DOMAIN/s: GroES-like (InterPro:IPR011032), Alcohol dehydrogenase GroES-like (InterPro:IPR013154), Alcohol dehydrogenase, zinc…	Alcohol dehydrogenase GroES-like | Alcohol dehydrogenase superfamily, zinc-type | Alcohol dehydrogenase, C-terminal | Alcohol dehydrogenase, zinc-type, conserved site | GroES (chaperonin 10)-like | NAD(P)-binding domain	NO
AT1G22450	0.356829	5.74306	0.000184328	0.0016631	UP	cytochrome C oxidase 6B	cytochrome C oxidase 6B (COX6B); FUNCTIONS IN: cytochrome-c oxidase activity, copper ion binding; INVOLVED IN: oxidation reduction, response to salt stress; LOCATED IN: thylakoid, mitochondrion, chloroplast thylakoid membrane, chloroplast; EXPRESSED IN: 24 plant structures; EXPRESSED DURING: 17 growth stages; CONTAINS InterPro DOMAIN/s: Cytochrome c oxidase, subunit VIb (InterPro:IPR003213); BEST…	Cytochrome c oxidase, subunit VIb	NO
AT1G22460	1.53544	-2.24834	0.00820081	0.0404232	UP	O-fucosyltransferase family protein	O-fucosyltransferase family protein; CONTAINS InterPro DOMAIN/s: GDP-fucose protein O-fucosyltransferase (InterPro:IPR019378); BEST Arabidopsis thaliana protein match is: O-fucosyltransferase family protein (TAIR:AT5G64600.1)	GDP-fucose protein O-fucosyltransferase | O-fucosyltransferase, plant	NO
AT1G22470	2.11354	0.560374	0.0013072	0.00883738	UP		unknown protein; BEST Arabidopsis thaliana protein match is: unknown protein (TAIR:AT1G72240.1)		NO
AT1G22490	1.9925	1.22493	4.0303e-15	2.74786e-13	UP	basic helix-loop-helix (bHLH) DNA-binding superfamily protein	basic helix-loop-helix (bHLH) DNA-binding superfamily protein; FUNCTIONS IN: DNA binding, sequence-specific DNA binding transcription factor activity; INVOLVED IN: regulation of transcription; LOCATED IN: nucleus; EXPRESSED IN: 17 plant structures; EXPRESSED DURING: 8 growth stages; CONTAINS InterPro DOMAIN/s: Helix-loop-helix DNA-binding domain (InterPro:IPR001092), Helix-loop-helix DNA-binding …	Myc-type, basic helix-loop-helix (bHLH) domain	NO
AT1G22510	0.591194	2.63861	0.000168241	0.00153772	UP	RING/U-box protein with domain of unknown function (DUF 1232)	RING/U-box protein with domain of unknown function (DUF 1232); FUNCTIONS IN: zinc ion binding; LOCATED IN: plasma membrane; EXPRESSED IN: 19 plant structures; EXPRESSED IN: 20 plant structures; EXPRESSED DURING: 13 growth stages; CONTAINS InterPro DOMAIN/s: Protein of unknown function DUF1232 (InterPro:IPR010652); CONTAINS InterPro DOMAIN/s: Protein of unknown function DUF1232 (InterPro:IPR010652…	Protein of unknown function DUF1232 | Zinc finger, RING-type | Zinc finger, RING-type, conserved site | Zinc finger, RING/FYVE/PHD-type	NO
AT1G22530	2.50547	6.53921	1.33968e-18	1.53475e-16	UP	PATELLIN 2	PATELLIN 2 (PATL2); FUNCTIONS IN: transporter activity; INVOLVED IN: transport; LOCATED IN: plasma membrane, chloroplast; EXPRESSED IN: 25 plant structures; EXPRESSED DURING: 14 growth stages; CONTAINS InterPro DOMAIN/s: Cellular retinaldehyde-binding/triple function, C-terminal (InterPro:IPR001251), Cellular retinaldehyde-binding/triple function, N-terminal (InterPro:IPR008273), Cellular retinal…	CRAL-TRIO domain | CRAL/TRIO, N-terminal domain | Cellular retinaldehyde binding/alpha-tocopherol transport | GOLD	NO
AT1G22550	0.559123	3.70248	5.53223e-05	0.0005936	UP	Major facilitator superfamily protein	Major facilitator superfamily protein; FUNCTIONS IN: transporter activity; INVOLVED IN: oligopeptide transport; LOCATED IN: membrane; EXPRESSED IN: 19 plant structures; EXPRESSED DURING: 9 growth stages; CONTAINS InterPro DOMAIN/s: PTR2 family proton/oligopeptide symporter, conserved site (InterPro:IPR018456), Oligopeptide transporter (InterPro:IPR000109), Major facilitator superfamily, general s…	Major facilitator superfamily domain, general substrate transporter | PTR2 family proton/oligopeptide symporter, conserved site | Proton-dependent oligopeptide transporter family	NO
AT1G22570	1.88595	4.2734	3.26178e-10	1.05736e-08	UP	Major facilitator superfamily protein	Major facilitator superfamily protein; FUNCTIONS IN: transporter activity; INVOLVED IN: oligopeptide transport; LOCATED IN: membrane; EXPRESSED IN: 17 plant structures; EXPRESSED DURING: 10 growth stages; CONTAINS InterPro DOMAIN/s: PTR2 family proton/oligopeptide symporter, conserved site (InterPro:IPR018456), Oligopeptide transporter (InterPro:IPR000109), Major facilitator superfamily, general …	Major facilitator superfamily domain, general substrate transporter | PTR2 family proton/oligopeptide symporter, conserved site | Proton-dependent oligopeptide transporter family	NO
AT1G22590	-0.62305	4.03515	2.75762e-07	5.17611e-06	DOWN	AGAMOUS-like 87	AGAMOUS-like 87 (AGL87); FUNCTIONS IN: sequence-specific DNA binding transcription factor activity; INVOLVED IN: regulation of transcription; LOCATED IN: nucleus; EXPRESSED IN: 19 plant structures; EXPRESSED DURING: 13 growth stages; CONTAINS InterPro DOMAIN/s: Transcription factor, MADS-box (InterPro:IPR002100); BEST Arabidopsis thaliana protein match is: MADS-box transcription factor family pro…	Transcription factor, MADS-box	NO
AT1G22610	0.300307	5.48301	0.00839134	0.0411935	UP	C2 calcium/lipid-binding plant phosphoribosyltransferase family protein	C2 calcium/lipid-binding plant phosphoribosyltransferase family protein; FUNCTIONS IN: molecular_function unknown; INVOLVED IN: biological_process unknown; LOCATED IN: chloroplast; EXPRESSED IN: 22 plant structures; EXPRESSED DURING: 13 growth stages; CONTAINS InterPro DOMAIN/s: C2 membrane targeting protein (InterPro:IPR018029), C2 calcium/lipid-binding domain, CaLB (InterPro:IPR008973), Phospho…	C2 domain | Phosphoribosyltransferase C-terminal	NO
AT1G22640	-0.429827	6.81765	0.00986964	0.047165	DOWN	myb domain protein 3	myb domain protein 3 (MYB3); CONTAINS InterPro DOMAIN/s: SANT, DNA-binding (InterPro:IPR001005), Homeodomain-like (InterPro:IPR009057), Myb, DNA-binding (InterPro:IPR014778), HTH transcriptional regulator, Myb-type, DNA-binding (InterPro:IPR017930), Homeodomain-related (InterPro:IPR012287), Myb transcription factor (InterPro:IPR015495); BEST Arabidopsis thaliana protein match is: myb domain prote…	Homeodomain-like | Myb domain | SANT/Myb domain	NO
AT1G22690	-0.728423	6.41654	7.28809e-06	9.96226e-05	DOWN	Gibberellin-regulated family protein	Gibberellin-regulated family protein; FUNCTIONS IN: molecular_function unknown; INVOLVED IN: response to gibberellin stimulus; LOCATED IN: endomembrane system; EXPRESSED IN: 18 plant structures; EXPRESSED DURING: 10 growth stages; CONTAINS InterPro DOMAIN/s: Gibberellin regulated protein (InterPro:IPR003854); BEST Arabidopsis thaliana protein match is: Gibberellin-regulated family protein (TAIR:A…	Gibberellin regulated protein	NO
AT1G22710	0.423983	7.45121	0.000893686	0.00641249	UP	sucrose-proton symporter 2	sucrose-proton symporter 2 (SUC2); CONTAINS InterPro DOMAIN/s: Sucrose/H+ symporter, plant (InterPro:IPR005989), Major facilitator superfamily MFS-1 (InterPro:IPR011701), Major facilitator superfamily, general substrate transporter (InterPro:IPR016196); BEST Arabidopsis thaliana protein match is: sucrose-proton symporter 1 (TAIR:AT1G71880.1)	General substrate transporter | Major facilitator superfamily domain, general substrate transporter | Sucrose/H+ symporter, plant	NO
AT1G22730	0.520679	5.13028	4.96368e-07	8.78982e-06	UP	MA3 domain-containing protein	MA3 domain-containing protein; CONTAINS InterPro DOMAIN/s: Initiation factor eIF-4 gamma, MA3 (InterPro:IPR003891); BEST Arabidopsis thaliana protein match is: MA3 domain-containing protein (TAIR:AT5G63190.2)	Armadillo-type fold | Initiation factor eIF-4 gamma, MA3 | MIF4-like, type 1/2/3	NO
AT1G22740	1.21021	3.82394	7.01381e-12	2.9529e-10	UP	RAB GTPase homolog G3B	RAB GTPase homolog G3B (RABG3B); FUNCTIONS IN: GTP binding; INVOLVED IN: intracellular protein transport, signal transduction, nucleocytoplasmic transport, protein transport, small GTPase mediated signal transduction; LOCATED IN: vacuole; EXPRESSED IN: 21 plant structures; EXPRESSED DURING: 12 growth stages; CONTAINS InterPro DOMAIN/s: Ran GTPase (InterPro:IPR002041), Ras (InterPro:IPR013753), Ra…	P-loop containing nucleoside triphosphate hydrolase | Small GTP-binding protein domain | Small GTPase superfamily | Small GTPase superfamily, Rab type	NO
AT1G22750	-0.466291	6.06102	7.21774e-06	9.88616e-05	DOWN		unknown protein; CONTAINS InterPro DOMAIN/s: Protein of unknown function DUF1475 (InterPro:IPR009943); FUNCTIONS IN: molecular_function unknown; INVOLVED IN: biological_process unknown; LOCATED IN: vacuole; EXPRESSED IN: 23 plant structures; EXPRESSED DURING: 15 growth stages	Protein of unknown function DUF1475	NO
AT1G22850	-0.323782	7.65458	0.000859179	0.0061926	DOWN	SNARE associated Golgi protein family	SNARE associated Golgi protein family; INVOLVED IN: biological_process unknown; LOCATED IN: chloroplast; EXPRESSED IN: 22 plant structures; EXPRESSED DURING: 15 growth stages; CONTAINS InterPro DOMAIN/s: SNARE associated Golgi protein (InterPro:IPR015414); BEST Arabidopsis thaliana protein match is: SNARE associated Golgi protein family (TAIR:AT1G03260.1)	SNARE associated Golgi protein	NO
AT1G22880	1.63265	-0.889533	0.000921533	0.00656892	UP	cellulase 5	cellulase 5 (CEL5); FUNCTIONS IN: hydrolase activity, hydrolyzing O-glycosyl compounds, catalytic activity; INVOLVED IN: carbohydrate metabolic process; LOCATED IN: cell wall, plasma membrane, plant-type cell wall; EXPRESSED IN: root; CONTAINS InterPro DOMAIN/s: Six-hairpin glycosidase (InterPro:IPR012341), Glycoside hydrolase, family 9, active site (InterPro:IPR018221), Six-hairpin glycosidase-l…	Glycoside hydrolase, family 9 | Glycoside hydrolase, family 9, active site | Six-hairpin glycosidase | Six-hairpin glycosidase-like	NO
AT1G22882	1.86909	4.88193	8.62916e-12	3.59257e-10	UP	Galactose-binding protein	Galactose-binding protein; FUNCTIONS IN: molecular_function unknown; INVOLVED IN: biological_process unknown; LOCATED IN: mitochondrion; CONTAINS InterPro DOMAIN/s: Sad1/UNC-like, C-terminal (InterPro:IPR012919), Galactose-binding domain-like (InterPro:IPR008979); BEST Arabidopsis thaliana protein match is: Galactose-binding protein (TAIR:AT1G71360.1)	Galactose-binding domain-like | Sad1/UNC-like, C-terminal	NO
AT1G22910	0.730328	4.73956	1.06271e-09	3.19297e-08	UP	RNA-binding (RRM/RBD/RNP motifs) family protein	RNA-binding (RRM/RBD/RNP motifs) family protein; FUNCTIONS IN: RNA binding, nucleotide binding, nucleic acid binding; INVOLVED IN: biological_process unknown; LOCATED IN: cellular_component unknown; EXPRESSED IN: 22 plant structures; EXPRESSED DURING: 13 growth stages; CONTAINS InterPro DOMAIN/s: RNA recognition motif, RNP-1 (InterPro:IPR000504), Nucleotide-binding, alpha-beta plait (InterPro:IPR…	Nucleotide-binding, alpha-beta plait | RNA recognition motif domain	NO
AT1G22920	0.398552	4.62279	0.000182709	0.00165026	UP	COP9 signalosome 5A	COP9 signalosome 5A (CSN5A); CONTAINS InterPro DOMAIN/s: Mov34/MPN/PAD-1 (InterPro:IPR000555); BEST Arabidopsis thaliana protein match is: COP9-signalosome 5B (TAIR:AT1G71230.1)	JAB1/MPN/MOV34 metalloenzyme domain	NO
AT1G22930	-0.331615	7.82296	0.00227039	0.0140104	DOWN	T-complex protein 11	T-complex protein 11; INVOLVED IN: biological_process unknown; BEST Arabidopsis thaliana protein match is: T-complex protein 11 (TAIR:AT4G09150.1); EXPRESSED IN: 24 plant structures; EXPRESSED DURING: 13 growth stages; CONTAINS InterPro DOMAIN/s: T-complex 11 (InterPro:IPR008862); BEST Arabidopsis thaliana protein match is: T-complex protein 11 (TAIR:AT4G09150.2)	T-complex 11	NO
AT1G22950	-0.468379	3.46865	0.00139081	0.00927416	DOWN	2-oxoglutarate (2OG) and Fe(II)-dependent oxygenase superfamily protein	2-oxoglutarate (2OG) and Fe(II)-dependent oxygenase superfamily protein; FUNCTIONS IN: oxidoreductase activity, oxidoreductase activity, acting on paired donors, with incorporation or reduction of molecular oxygen, iron ion binding, L-ascorbic acid binding; INVOLVED IN: oxidation reduction; LOCATED IN: cellular_component unknown; CONTAINS InterPro DOMAIN/s: Prolyl 4-hydroxylase, alpha subunit (In…	Oxoglutarate/iron-dependent dioxygenase | Prolyl 4-hydroxylase, alpha subunit	NO
AT1G22990	0.96738	4.16108	3.46004e-07	6.34391e-06	UP	Heavy metal transport/detoxification superfamily protein	Heavy metal transport/detoxification superfamily protein ; FUNCTIONS IN: metal ion binding; INVOLVED IN: metal ion transport; LOCATED IN: cellular_component unknown; EXPRESSED IN: 9 plant structures; EXPRESSED DURING: LP.04 four leaves visible, 4 anthesis, C globular stage; CONTAINS InterPro DOMAIN/s: Heavy metal transport/detoxification protein (InterPro:IPR006121); BEST Arabidopsis thaliana pro…	Heavy metal-associated domain, HMA	NO
AT1G23030	2.18803	5.36118	1.62672e-09	4.75192e-08	UP	ARM repeat superfamily protein	ARM repeat superfamily protein; FUNCTIONS IN: ubiquitin-protein ligase activity, binding; INVOLVED IN: response to chitin; LOCATED IN: ubiquitin ligase complex; EXPRESSED IN: 23 plant structures; EXPRESSED DURING: 15 growth stages; CONTAINS InterPro DOMAIN/s: U box domain (InterPro:IPR003613), Armadillo-like helical (InterPro:IPR011989), Armadillo (InterPro:IPR000225), Armadillo-type fold (InterP…	Armadillo | Armadillo-like helical | Armadillo-type fold | U box domain | Zinc finger, RING/FYVE/PHD-type	NO
AT1G23052	1.11845	5.38465	1.40307e-19	1.84597e-17	UP				NO
AT1G23190	-0.439065	6.37145	4.27924e-05	0.000475491	DOWN	Phosphoglucomutase/phosphomannomutase family protein	Phosphoglucomutase/phosphomannomutase family protein; FUNCTIONS IN: intramolecular transferase activity, phosphotransferases, magnesium ion binding, phosphoglucomutase activity; INVOLVED IN: response to cadmium ion, carbohydrate metabolic process; LOCATED IN: cytosol, nucleus, plasma membrane, chloroplast, cytoplasm; EXPRESSED IN: 25 plant structures; EXPRESSED DURING: 15 growth stages; CONTAINS …	Alpha-D-phosphohexomutase superfamily | Alpha-D-phosphohexomutase, C-terminal | Alpha-D-phosphohexomutase, alpha/beta/alpha I/II/III | Alpha-D-phosphohexomutase, alpha/beta/alpha domain I | Alpha-D-phosphohexomutase, alpha/beta/alpha domain II | Alpha-D-phosphohexomutase, alpha/beta/alpha domain III | Alpha-D-phosphohexomutase, conserved site	NO
AT1G23205	-1.34251	2.3207	1.95549e-07	3.76575e-06	DOWN	Plant invertase/pectin methylesterase inhibitor superfamily protein	Plant invertase/pectin methylesterase inhibitor superfamily protein; FUNCTIONS IN: enzyme inhibitor activity, pectinesterase inhibitor activity, pectinesterase activity; INVOLVED IN: biological_process unknown; LOCATED IN: endomembrane system; EXPRESSED IN: 18 plant structures; EXPRESSED DURING: 13 growth stages; CONTAINS InterPro DOMAIN/s: Pectinesterase inhibitor (InterPro:IPR006501); BEST Arab…	Pectinesterase inhibitor domain	NO
AT1G23220	-0.346085	3.88452	0.0038514	0.0217759	DOWN	Dynein light chain type 1 family protein	Dynein light chain type 1 family protein; FUNCTIONS IN: microtubule motor activity; INVOLVED IN: microtubule-based process; LOCATED IN: microtubule associated complex; EXPRESSED IN: 23 plant structures; EXPRESSED DURING: 13 growth stages; CONTAINS InterPro DOMAIN/s: Dynein light chain, type 1/2 (InterPro:IPR001372); BEST Arabidopsis thaliana protein match is: Dynein light chain type 1 family prot…	Dynein light chain, type 1/2	NO
AT1G23280	0.386325	4.13243	0.00631059	0.0325294	UP	MAK16 protein-related	MAK16 protein-related; CONTAINS InterPro DOMAIN/s: Mak16 protein (InterPro:IPR006958)	Mak16 protein | Ribosomal L28e/Mak16	NO
AT1G23290	0.263905	6.86338	0.00500593	0.0269595	UP	Ribosomal protein L18e/L15 superfamily protein	RPL27AB; FUNCTIONS IN: structural constituent of ribosome; INVOLVED IN: translation; LOCATED IN: cytosolic ribosome, ribosome, cytosolic large ribosomal subunit, nucleolus, large ribosomal subunit; EXPRESSED IN: 23 plant structures; EXPRESSED DURING: 13 growth stages; CONTAINS InterPro DOMAIN/s: Ribosomal protein L18e/L15 (InterPro:IPR021131), Ribosomal protein L15, conserved site (InterPro:IPR00…	Ribosomal protein L15, conserved site | Ribosomal protein L18e/L15P	NO
AT1G23310	-0.353685	11.6264	7.0959e-05	0.000735722	DOWN	glutamate:glyoxylate aminotransferase	glutamate:glyoxylate aminotransferase (GGT1); FUNCTIONS IN: glycine:2-oxoglutarate aminotransferase activity, L-alanine:2-oxoglutarate aminotransferase activity, alanine-glyoxylate transaminase activity; INVOLVED IN: photorespiration; LOCATED IN: apoplast, chloroplast, peroxisome, vacuole, membrane; LOCATED IN: apoplast, peroxisome, chloroplast, vacuole, membrane; EXPRESSED IN: 23 plant structure…	Aminotransferase, class I/classII | Pyridoxal phosphate-dependent transferase | Pyridoxal phosphate-dependent transferase, major region, subdomain 1 | Pyridoxal phosphate-dependent transferase, major region, subdomain 2	NO
AT1G23410	0.798121	1.88862	0.000206317	0.00183253	UP	Ribosomal protein S27a / Ubiquitin family protein	Ribosomal protein S27a / Ubiquitin family protein; FUNCTIONS IN: structural constituent of ribosome; INVOLVED IN: protein ubiquitination involved in ubiquitin-dependent protein catabolic process, translation; LOCATED IN: cytosolic small ribosomal subunit, plasma membrane; EXPRESSED IN: 21 plant structures; EXPRESSED DURING: 11 growth stages; CONTAINS InterPro DOMAIN/s: Ubiquitin subgroup (InterPr…	Ribosomal protein S27a | Ubiquitin | Ubiquitin conserved site | Ubiquitin-like | Ubiquitin-related domain | Zinc-binding ribosomal protein	NO
AT1G23450	0.933858	0.630156	0.000332468	0.00276695	UP	Tetratricopeptide repeat (TPR)-like superfamily protein	Tetratricopeptide repeat (TPR)-like superfamily protein; LOCATED IN: mitochondrion; EXPRESSED IN: root, pedicel; EXPRESSED DURING: 4 anthesis; CONTAINS InterPro DOMAIN/s: Pentatricopeptide repeat (InterPro:IPR002885); BEST Arabidopsis thaliana protein match is: pentatricopeptide (PPR) repeat-containing protein (TAIR:AT1G74600.1)		YES	1:8325808:G-GT;exonic_variant&protein_coding,1:8324739:G-A;protein_coding;sense;ACG>ACA;T>T,1:8325810:C-T;protein_coding;sense;GCC>GCT;A>A
AT1G23480	1.88638	4.51744	2.06322e-13	1.11722e-11	UP	cellulose synthase-like A3	cellulose synthase-like A3 (CSLA03); FUNCTIONS IN: cellulose synthase activity, transferase activity, transferring glycosyl groups; INVOLVED IN: biological_process unknown; LOCATED IN: endomembrane system; EXPRESSED IN: 19 plant structures; EXPRESSED DURING: 10 growth stages; CONTAINS InterPro DOMAIN/s: Glycosyl transferase, family 2 (InterPro:IPR001173); BEST Arabidopsis thaliana protein match i…	Nucleotide-diphospho-sugar transferases	NO
AT1G23510	-1.81825	-1.8522	0.00182782	0.0116951	DOWN		unknown protein; BEST Arabidopsis thaliana protein match is: Domain of unknown function (DUF220) (TAIR:AT1G23520.1)		NO
AT1G23530	0.722771	1.27948	0.00369172	0.0209964	UP		unknown protein; BEST Arabidopsis thaliana protein match is: unknown protein (TAIR:AT1G70470.1)		NO
AT1G23710	-0.547428	4.49689	0.00276396	0.0165059	DOWN	Protein of unknown function (DUF1645)	Protein of unknown function (DUF1645); CONTAINS InterPro DOMAIN/s: Protein of unknown function DUF1645 (InterPro:IPR012442); BEST Arabidopsis thaliana protein match is: Protein of unknown function (DUF1645) (TAIR:AT1G70420.1)	Protein of unknown function DUF1645, plant	NO
AT1G23720	0.890309	4.09958	0.000290338	0.00246754	UP	Proline-rich extensin-like family protein	Proline-rich extensin-like family protein; FUNCTIONS IN: structural constituent of cell wall; INVOLVED IN: plant-type cell wall organization; EXPRESSED IN: hypocotyl, root, carpel; EXPRESSED DURING: petal differentiation and expansion stage; CONTAINS InterPro DOMAIN/s: Extensin-like repeat (InterPro:IPR006706); BEST Arabidopsis thaliana protein match is: Proline-rich extensin-like family protein …	Extensin domain	NO
AT1G23740	-0.857148	8.25379	9.14736e-19	1.08867e-16	DOWN	Oxidoreductase, zinc-binding dehydrogenase family protein	Oxidoreductase, zinc-binding dehydrogenase family protein; FUNCTIONS IN: oxidoreductase activity, zinc ion binding; INVOLVED IN: response to cold; LOCATED IN: in 6 components; EXPRESSED IN: 22 plant structures; EXPRESSED DURING: 14 growth stages; CONTAINS InterPro DOMAIN/s: GroES-like (InterPro:IPR011032), Alcohol dehydrogenase GroES-like (InterPro:IPR013154), Quinone oxidoreductase/zeta-crystall…	Alcohol dehydrogenase GroES-like | Alcohol dehydrogenase superfamily, zinc-type | GroES (chaperonin 10)-like | NAD(P)-binding domain | Quinone oxidoreductase/zeta-crystallin, conserved site	NO
AT1G23750	-0.466891	2.76069	0.00231473	0.0142189	DOWN	Nucleic acid-binding, OB-fold-like protein	Nucleic acid-binding, OB-fold-like protein; CONTAINS InterPro DOMAIN/s: Nucleic acid-binding, OB-fold-like (InterPro:IPR016027), Nucleic acid-binding, OB-fold (InterPro:IPR012340); BEST Arabidopsis thaliana protein match is: Nucleic acid-binding, OB-fold-like protein (TAIR:AT1G10590.2)	Nucleic acid-binding, OB-fold	NO
AT1G23820	0.306045	6.16427	0.00197885	0.0125046	UP	spermidine synthase 1	spermidine synthase 1 (SPDS1); FUNCTIONS IN: spermidine synthase activity; INVOLVED IN: spermidine biosynthetic process; LOCATED IN: cellular_component unknown; EXPRESSED IN: 25 plant structures; EXPRESSED DURING: 15 growth stages; CONTAINS InterPro DOMAIN/s: Spermine synthase (InterPro:IPR001045); BEST Arabidopsis thaliana protein match is: spermidine synthase 2 (TAIR:AT1G70310.1)	S-adenosyl-L-methionine-dependent methyltransferase-like | Spermidine/spermine synthases family	NO
AT1G23860	0.368369	5.24232	0.000483534	0.00380868	UP	RS-containing zinc finger protein 21	RS-containing zinc finger protein 21 (RSZP21); SRZ-21; CONTAINS InterPro DOMAIN/s: RNA recognition motif, RNP-1 (InterPro:IPR000504), Nucleotide-binding, alpha-beta plait (InterPro:IPR012677), Zinc finger, CCHC-type (InterPro:IPR001878); FUNCTIONS IN: protein binding; BEST Arabidopsis thaliana protein match is: serine/arginine-rich 22 (TAIR:AT4G31580.2); INVOLVED IN: nuclear mRNA splicing, via sp…	Nucleotide-binding, alpha-beta plait | RNA recognition motif domain | Zinc finger, CCHC-type	NO
AT1G23870	0.98607	6.63568	1.4654e-19	1.92048e-17	UP	trehalose-phosphatase/synthase 9	trehalose-phosphatase/synthase 9 (TPS9); FUNCTIONS IN: transferase activity, transferring glycosyl groups, trehalose-phosphatase activity; INVOLVED IN: trehalose biosynthetic process, metabolic process; EXPRESSED IN: 27 plant structures; EXPRESSED DURING: 15 growth stages; CONTAINS InterPro DOMAIN/s: HAD-superfamily hydrolase, subfamily IIB (InterPro:IPR006379), Glycosyl transferase, family 20 (I…	Glycosyl transferase, family 20 | HAD-like domain | HAD-superfamily hydrolase, subfamily IIB | Trehalose-phosphatase	NO
AT1G23960	-0.635816	5.54564	8.60548e-10	2.62537e-08	DOWN	Protein of unknown function (DUF626)	Protein of unknown function (DUF626); CONTAINS InterPro DOMAIN/s: Protein of unknown function DUF626, Arabidopsis thaliana (InterPro:IPR006462); BEST Arabidopsis thaliana protein match is: Protein of unknown function (DUF626) (TAIR:AT1G23970.1)	Protein of unknown function DUF626, Arabidopsis thaliana	NO
AT1G24040	-0.270613	4.58137	0.00972208	0.0466054	DOWN	Acyl-CoA N-acyltransferases (NAT) superfamily protein	Acyl-CoA N-acyltransferases (NAT) superfamily protein; FUNCTIONS IN: N-acetyltransferase activity; INVOLVED IN: metabolic process; LOCATED IN: chloroplast; EXPRESSED IN: 22 plant structures; EXPRESSED DURING: 13 growth stages; CONTAINS InterPro DOMAIN/s: GCN5-related N-acetyltransferase, C-terminal (InterPro:IPR022610), Acyl-CoA N-acyltransferase (InterPro:IPR016181)	Acyl-CoA N-acyltransferase | GNAT domain	NO
AT1G24050	0.258602	5.76414	0.0098086	0.0469266	UP	RNA-processing, Lsm domain	RNA-processing, Lsm domain; CONTAINS InterPro DOMAIN/s: RNA-processing, Lsm domain (InterPro:IPR019181); BEST Arabidopsis thaliana protein match is: RNA-processing, Lsm domain (TAIR:AT1G70220.1)	Anticodon-binding domain	NO
AT1G24090	1.10873	0.500423	0.000301958	0.00254638	UP	RNase H family protein	RNase H family protein; FUNCTIONS IN: ribonuclease H activity, nucleic acid binding; INVOLVED IN: biological_process unknown; EXPRESSED IN: 11 plant structures; EXPRESSED DURING: 6 growth stages; CONTAINS InterPro DOMAIN/s: Ribosomal protein L9/RNase H1, N-terminal (InterPro:IPR009027), Polynucleotidyl transferase, ribonuclease H fold (InterPro:IPR012337), Ribonuclease H (InterPro:IPR002156); BES…	Ribonuclease H domain | Ribonuclease H-like domain | Ribonuclease H1, N-terminal | Ribosomal protein L9/RNase H1, N-terminal	NO
AT1G24147	-1.45108	2.07142	4.494e-06	6.45744e-05	DOWN		unknown protein; FUNCTIONS IN: molecular_function unknown; INVOLVED IN: biological_process unknown; LOCATED IN: endomembrane system; BEST Arabidopsis thaliana protein match is: unknown protein (TAIR:AT1G24148.1)		NO
AT1G24148	-0.992372	5.08889	1.79726e-20	2.53279e-18	DOWN		unknown protein; FUNCTIONS IN: molecular_function unknown; INVOLVED IN: biological_process unknown; LOCATED IN: cellular_component unknown; BEST Arabidopsis thaliana protein match is: unknown protein (TAIR:AT1G24147.1)		NO
AT1G24160	0.491739	6.90426	1.09043e-07	2.22317e-06	UP		unknown protein; FUNCTIONS IN: molecular_function unknown; INVOLVED IN: biological_process unknown; LOCATED IN: cellular_component unknown; EXPRESSED IN: guard cell; BEST Arabidopsis thaliana protein match is: unknown protein (TAIR:AT1G70100.3)		NO
AT1G24170	1.88661	5.04313	1.13556e-10	4.00072e-09	UP	Nucleotide-diphospho-sugar transferases superfamily protein	LGT9; FUNCTIONS IN: transferase activity, transferring hexosyl groups, polygalacturonate 4-alpha-galacturonosyltransferase activity, transferase activity, transferring glycosyl groups; INVOLVED IN: carbohydrate biosynthetic process; LOCATED IN: endomembrane system; EXPRESSED IN: 23 plant structures; EXPRESSED DURING: 13 growth stages; CONTAINS InterPro DOMAIN/s: Glycosyl transferase, family 8 (In…	Glycosyl transferase, family 8 | Nucleotide-diphospho-sugar transferases	NO
AT1G24180	0.341433	5.48587	0.0005146	0.00401302	UP	Thiamin diphosphate-binding fold (THDP-binding) superfamily protein	IAA-CONJUGATE-RESISTANT 4 (IAR4); FUNCTIONS IN: cobalt ion binding, pyruvate dehydrogenase (acetyl-transferring) activity, zinc ion binding; INVOLVED IN: response to salt stress, metabolic process; LOCATED IN: cytosol, mitochondrion, nucleus; EXPRESSED IN: 26 plant structures; EXPRESSED DURING: 15 growth stages; CONTAINS InterPro DOMAIN/s: Dehydrogenase, E1 component (InterPro:IPR001017), Pyruvat…	Dehydrogenase, E1 component | Pyruvate dehydrogenase (acetyl-transferring) E1 component, alpha subunit, subgroup y | Thiamin diphosphate-binding fold	NO
AT1G24320	0.901646	-0.878142	0.0101017	0.0481113	UP	Six-hairpin glycosidases superfamily protein	Six-hairpin glycosidases superfamily protein; FUNCTIONS IN: mannosyl-oligosaccharide glucosidase activity, alpha-glucosidase activity, catalytic activity; INVOLVED IN: oligosaccharide metabolic process; LOCATED IN: cellular_component unknown; EXPRESSED IN: 6 plant structures; EXPRESSED DURING: F mature embryo stage, petal differentiation and expansion stage, D bilateral stage; CONTAINS InterPro D…	Glycoside hydrolase, family 63 | Six-hairpin glycosidase-like	NO
AT1G24340	0.265696	5.2254	0.00608409	0.0315988	UP	FAD/NAD(P)-binding oxidoreductase family protein	EMBRYO DEFECTIVE 2421 (EMB2421); FUNCTIONS IN: monooxygenase activity; INVOLVED IN: embryo development ending in seed dormancy; EXPRESSED IN: 23 plant structures; EXPRESSED DURING: 14 growth stages; CONTAINS InterPro DOMAIN/s: Monooxygenase, FAD-binding (InterPro:IPR002938)		NO
AT1G24510	0.300714	6.74522	0.000896686	0.00642717	UP	TCP-1/cpn60 chaperonin family protein	TCP-1/cpn60 chaperonin family protein; FUNCTIONS IN: protein binding; INVOLVED IN: protein folding, cellular protein metabolic process; LOCATED IN: plasma membrane; EXPRESSED IN: 23 plant structures; EXPRESSED DURING: 14 growth stages; CONTAINS InterPro DOMAIN/s: Chaperone, tailless complex polypeptide 1 (InterPro:IPR017998), Chaperonin Cpn60/TCP-1 (InterPro:IPR002423), T-complex protein 1, epsil…	Chaperone tailless complex polypeptide 1 (TCP-1) | Chaperonin Cpn60/TCP-1 | Chaperonin TCP-1, conserved site | GroEL-like apical domain | GroEL-like equatorial domain | T-complex protein 1, epsilon subunit | TCP-1-like chaperonin intermediate domain	NO
AT1G24530	1.75872	4.31293	1.48539e-08	3.64e-07	UP	Transducin/WD40 repeat-like superfamily protein	Transducin/WD40 repeat-like superfamily protein; FUNCTIONS IN: nucleotide binding; INVOLVED IN: biological_process unknown; LOCATED IN: plasma membrane, heterotrimeric G-protein complex; EXPRESSED IN: 24 plant structures; EXPRESSED DURING: 14 growth stages; CONTAINS InterPro DOMAIN/s: WD40 repeat 2 (InterPro:IPR019782), WD40 repeat-like-containing domain (InterPro:IPR011046), WD40-repeat-containi…	G-protein beta WD-40 repeat | WD40 repeat | WD40-repeat-containing domain | WD40/YVTN repeat-like-containing domain	NO
AT1G24560	0.257551	5.46042	0.00689203	0.0349699	UP		unknown protein; BEST Arabidopsis thaliana protein match is: unknown protein (TAIR:AT3G49055.1)		NO
AT1G24570	-3.21264	-3.03125	0.0053015	0.0282934	DOWN	Protein of unknown function (DUF707)	Protein of unknown function (DUF707); CONTAINS InterPro DOMAIN/s: Protein of unknown function DUF707 (InterPro:IPR007877); BEST Arabidopsis thaliana protein match is: Protein of unknown function (DUF707) (TAIR:AT1G67850.2)	Protein of unknown function DUF707	NO
AT1G24577	-0.718452	1.35622	0.000651	0.00489734	DOWN		unknown protein; BEST Arabidopsis thaliana protein match is: unknown protein (TAIR:AT1G67910.2)		NO
AT1G24580	-2.54072	2.08932	7.36786e-09	1.91775e-07	DOWN	RING/U-box superfamily protein	RING/U-box superfamily protein; FUNCTIONS IN: zinc ion binding; LOCATED IN: endomembrane system; CONTAINS InterPro DOMAIN/s: Zinc finger, RING-type (InterPro:IPR001841), Zinc finger, C3HC4 RING-type (InterPro:IPR018957); BEST Arabidopsis thaliana protein match is: RING/U-box superfamily protein (TAIR:AT1G67856.1)	Zinc finger, RING-type | Zinc finger, RING/FYVE/PHD-type	NO
AT1G24706	0.405695	6.18295	1.69151e-05	0.000209302	UP	THO2	THO2; FUNCTIONS IN: molecular_function unknown; INVOLVED IN: biological_process unknown; LOCATED IN: cellular_component unknown; EXPRESSED IN: 23 plant structures; EXPRESSED IN: 24 plant structures; EXPRESSED DURING: 13 growth stages; CONTAINS InterPro DOMAIN/s: THO complex, subunitTHOC2, C-region (InterPro:IPR021418), THO complex, subunitTHOC2, N-region (InterPro:IPR021726)	Signal transduction histidine kinase EnvZ-like, dimerisation/phosphoacceptor domain | THO complex, subunitTHOC2, C-terminal | THO complex, subunitTHOC2, N-terminal	NO
AT1G24793	-0.371859	4.49903	0.00814366	0.0402239	DOWN	UDP-3-O-acyl N-acetylglycosamine deacetylase family protein	UDP-3-O-acyl N-acetylglycosamine deacetylase family protein; FUNCTIONS IN: UDP-3-O-[3-hydroxymyristoyl] N-acetylglucosamine deacetylase activity; INVOLVED IN: lipid A biosynthetic process; EXPRESSED IN: male gametophyte, pollen tube; EXPRESSED DURING: L mature pollen stage, M germinated pollen stage; CONTAINS InterPro DOMAIN/s: UDP-3-O-acyl N-acetylglucosamine deacetylase, N-terminal (InterPro:IP…	Ribosomal protein S5 domain 2-type fold | UDP-3-O-acyl N-acetylglucosamine deacetylase | UDP-3-O-acyl N-acetylglucosamine deacetylase, C-terminal | UDP-3-O-acyl N-acetylglucosamine deacetylase, N-terminal	NO
AT1G24880	-0.66534	2.22502	0.00100434	0.00707563	DOWN	UDP-3-O-acyl N-acetylglycosamine deacetylase family protein	UDP-3-O-acyl N-acetylglycosamine deacetylase family protein; BEST Arabidopsis thaliana protein match is: UDP-3-O-acyl N-acetylglycosamine deacetylase family protein (TAIR:AT1G25054.1); FUNCTIONS IN: UDP-3-O-[3-hydroxymyristoyl] N-acetylglucosamine deacetylase activity; INVOLVED IN: lipid A biosynthetic process; CONTAINS InterPro DOMAIN/s: UDP-3-O-acyl N-acetylglucosamine deacetylase, N-terminal (…		NO
AT1G24881	1.8881	4.9992	1.16407e-06	1.91909e-05	UP	F-box family protein	F-box family protein; CONTAINS InterPro DOMAIN/s: F-box domain, cyclin-like (InterPro:IPR001810), F-box domain, Skp2-like (InterPro:IPR022364), F-box associated domain, type 1 (InterPro:IPR006527), F-box associated interaction domain (InterPro:IPR017451); BEST Arabidopsis thaliana protein match is: F-box family protein (TAIR:AT1G25150.1)	F-box associated domain, type 1 | F-box associated interaction domain | F-box domain | Galactose oxidase/kelch, beta-propeller	NO
AT1G25098	-0.438401	8.15844	0.00249239	0.0151228	DOWN	other RNA			NO
AT1G25175	-0.822077	6.3034	1.38902e-07	2.76171e-06	DOWN	other RNA			NO
AT1G25209	-1.16939	-0.120335	0.00374414	0.0212515	DOWN			F-box associated domain, type 1 | F-box associated interaction domain	NO
AT1G25211	0.303165	4.17252	0.00683017	0.0347083	UP	F-box family protein	F-box family protein; CONTAINS InterPro DOMAIN/s: F-box domain, cyclin-like (InterPro:IPR001810), F-box domain, Skp2-like (InterPro:IPR022364), F-box associated domain, type 1 (InterPro:IPR006527), F-box associated interaction domain (InterPro:IPR017451); BEST Arabidopsis thaliana protein match is: F-box family protein (TAIR:AT1G25150.1)	F-box associated domain, type 1 | F-box associated interaction domain | F-box domain | Galactose oxidase/kelch, beta-propeller	NO
AT1G25230	1.67537	6.52034	6.89598e-49	8.00909e-46	UP	Calcineurin-like metallo-phosphoesterase superfamily protein	Calcineurin-like metallo-phosphoesterase superfamily protein; FUNCTIONS IN: hydrolase activity, protein serine/threonine phosphatase activity; INVOLVED IN: biological_process unknown; LOCATED IN: endomembrane system; EXPRESSED IN: 22 plant structures; EXPRESSED DURING: 13 growth stages; CONTAINS InterPro DOMAIN/s: Metallophosphoesterase (InterPro:IPR004843); BEST Arabidopsis thaliana protein matc…	Acid phosphatase, type 5 | Calcineurin-like phosphoesterase domain, apaH type | Metallo-dependent phosphatase-like	NO
AT1G25260	0.32829	5.27164	0.00120261	0.00822103	UP	Ribosomal protein L10 family protein	Ribosomal protein L10 family protein; FUNCTIONS IN: structural constituent of ribosome; INVOLVED IN: translation, ribosome biogenesis; LOCATED IN: cytosolic ribosome, ribosome; EXPRESSED IN: 23 plant structures; EXPRESSED DURING: 13 growth stages; CONTAINS InterPro DOMAIN/s: Ribosomal protein L10 (InterPro:IPR001790); BEST Arabidopsis thaliana protein match is: Ribosomal protein L10 family protei…	Ribosomal protein L10/acidic P0	NO
AT1G25277	-0.837023	1.23182	9.66738e-05	0.000962159	DOWN				NO
AT1G25320	0.730403	2.74694	2.19826e-05	0.000264616	UP	Leucine-rich repeat protein kinase family protein	Leucine-rich repeat protein kinase family protein; FUNCTIONS IN: protein serine/threonine kinase activity, kinase activity, ATP binding; INVOLVED IN: transmembrane receptor protein tyrosine kinase signaling pathway, protein amino acid phosphorylation; LOCATED IN: plasma membrane; EXPRESSED IN: 20 plant structures; EXPRESSED DURING: 11 growth stages; CONTAINS InterPro DOMAIN/s: Protein kinase, cat…	Leucine-rich repeat | Leucine-rich repeat-containing N-terminal, type 2 | Protein kinase domain | Protein kinase-like domain	NO
AT1G25360	0.838918	0.640463	0.000226216	0.0019852	UP	Pentatricopeptide repeat (PPR) superfamily protein	Pentatricopeptide repeat (PPR) superfamily protein; FUNCTIONS IN: molecular_function unknown; INVOLVED IN: biological_process unknown; LOCATED IN: cellular_component unknown; EXPRESSED IN: 16 plant structures; EXPRESSED DURING: 9 growth stages; CONTAINS InterPro DOMAIN/s: Pentatricopeptide repeat (InterPro:IPR002885); BEST Arabidopsis thaliana protein match is: pentatricopeptide (PPR) repeat-cont…	Pentatricopeptide repeat | Tetratricopeptide-like helical domain	NO
AT1G25400	1.68978	2.89839	0.00501004	0.026973	UP		unknown protein; FUNCTIONS IN: molecular_function unknown; INVOLVED IN: biological_process unknown; LOCATED IN: cellular_component unknown; EXPRESSED IN: 20 plant structures; EXPRESSED DURING: 10 growth stages; BEST Arabidopsis thaliana protein match is: unknown protein (TAIR:AT1G68440.1)		NO
AT1G25440	-0.829866	7.41088	1.82394e-12	8.46173e-11	DOWN	B-box type zinc finger protein with CCT domain	B-box type zinc finger protein with CCT domain; FUNCTIONS IN: sequence-specific DNA binding transcription factor activity, zinc ion binding; INVOLVED IN: regulation of transcription; LOCATED IN: membrane; EXPRESSED IN: leaf; CONTAINS InterPro DOMAIN/s: CCT domain (InterPro:IPR010402), Zinc finger, B-box (InterPro:IPR000315); BEST Arabidopsis thaliana protein match is: B-box type zinc finger prote…	CCT domain | Zinc finger, B-box	NO
AT1G25472	0.663804	2.61129	0.00457339	0.0250914	UP	conserved peptide upstream open reading frame 54	conserved peptide upstream open reading frame 54 (CPuORF54); LOCATED IN: endomembrane system; BEST Arabidopsis thaliana protein match is: conserved peptide upstream open reading frame 53 (TAIR:AT1G68552.1)	AP2/ERF domain | DNA-binding domain | Pathogenesis-related genes transcriptional activator PTI6	NO
AT1G25480	0.446511	3.94702	0.00457689	0.0250984	UP	Aluminium activated malate transporter family protein	Aluminium activated malate transporter family protein; FUNCTIONS IN: molecular_function unknown; INVOLVED IN: response to aluminum ion; LOCATED IN: cellular_component unknown; CONTAINS InterPro DOMAIN/s: Malate transporter, aliminium toerance (InterPro:IPR020966); BEST Arabidopsis thaliana protein match is: Aluminium activated malate transporter family protein (TAIR:AT1G68600.1)	Aluminum-activated malate transporter	NO
AT1G25510	1.08751	1.66548	1.85026e-06	2.89584e-05	UP	Eukaryotic aspartyl protease family protein	Eukaryotic aspartyl protease family protein; FUNCTIONS IN: aspartic-type endopeptidase activity; INVOLVED IN: proteolysis; LOCATED IN: endomembrane system; EXPRESSED IN: 13 plant structures; EXPRESSED DURING: 6 growth stages; CONTAINS InterPro DOMAIN/s: Peptidase aspartic (InterPro:IPR021109), Peptidase aspartic, catalytic (InterPro:IPR009007), Peptidase A1 (InterPro:IPR001461); BEST Arabidopsis …	Aspartic peptidase | Aspartic peptidase domain	NO
AT1G25520	0.506527	4.90479	0.000555219	0.00428907	UP	Uncharacterized protein family (UPF0016)	Uncharacterized protein family (UPF0016); INVOLVED IN: response to karrikin; LOCATED IN: membrane; EXPRESSED IN: 22 plant structures; EXPRESSED DURING: 13 growth stages; CONTAINS InterPro DOMAIN/s: Uncharacterised protein family UPF0016 (InterPro:IPR001727); BEST Arabidopsis thaliana protein match is: Uncharacterized protein family (UPF0016) (TAIR:AT1G68650.1)	Uncharacterised protein family UPF0016	NO
AT1G25540	0.458174	5.22805	3.77449e-06	5.53455e-05	UP	phytochrome and flowering time regulatory protein (PFT1)	PHYTOCHROME AND FLOWERING TIME 1 (PFT1); CONTAINS InterPro DOMAIN/s: Mediator complex subunit Med25, von Willebrand factor type A (InterPro:IPR021419), von Willebrand factor, type A (InterPro:IPR002035); FUNCTIONS IN: transcription coactivator activity; INVOLVED IN: in 8 processes; LOCATED IN: mediator complex, nucleus; EXPRESSED IN: 23 plant structures; EXPRESSED DURING: 15 growth stages; CONTAI…	Mediator complex, subunit Med25, von Willebrand factor type A | von Willebrand factor, type A	NO
AT1G25550	1.08238	7.31034	1.42862e-10	4.96566e-09	UP	myb-like transcription factor family protein	myb-like transcription factor family protein; CONTAINS InterPro DOMAIN/s: Homeodomain-like (InterPro:IPR009057), Myb, DNA-binding (InterPro:IPR014778), Myb-like DNA-binding domain, SHAQKYF class (InterPro:IPR006447), HTH transcriptional regulator, Myb-type, DNA-binding (InterPro:IPR017930), Homeodomain-related (InterPro:IPR012287); BEST Arabidopsis thaliana protein match is: myb-like transcriptio…	Homeodomain-like | Myb domain | Myb domain, plants | SANT/Myb domain	NO
AT1G25560	0.699761	7.69548	0.00087198	0.00627278	UP	AP2/B3 transcription factor family protein	TEMPRANILLO 1 (TEM1); FUNCTIONS IN: DNA binding, sequence-specific DNA binding transcription factor activity; INVOLVED IN: photoperiodism, flowering, ethylene mediated signaling pathway; LOCATED IN: chloroplast; EXPRESSED IN: 22 plant structures; EXPRESSED DURING: 13 growth stages; CONTAINS InterPro DOMAIN/s: DNA-binding, integrase-type (InterPro:IPR016177), Transcriptional factor B3 (InterPro:IP…	AP2/ERF domain | B3 DNA binding domain | DNA-binding domain | DNA-binding pseudobarrel domain	NO
AT1G25682	0.333901	4.70281	0.00102373	0.00719089	UP	Family of unknown function (DUF572)	Family of unknown function (DUF572) ; FUNCTIONS IN: molecular_function unknown; INVOLVED IN: biological_process unknown; LOCATED IN: cellular_component unknown; EXPRESSED IN: cotyledon; CONTAINS InterPro DOMAIN/s: Protein of unknown function DUF572 (InterPro:IPR007590); BEST Arabidopsis thaliana protein match is: Family of unknown function (DUF572) (TAIR:AT1G25988.1)	CWC16 protein	NO
AT1G26220	-0.807895	4.45413	2.87491e-12	1.28422e-10	DOWN	Acyl-CoA N-acyltransferases (NAT) superfamily protein	Acyl-CoA N-acyltransferases (NAT) superfamily protein; FUNCTIONS IN: N-acetyltransferase activity; INVOLVED IN: metabolic process; LOCATED IN: chloroplast; EXPRESSED IN: 18 plant structures; EXPRESSED DURING: 10 growth stages; CONTAINS InterPro DOMAIN/s: GCN5-related N-acetyltransferase, C-terminal (InterPro:IPR022610), GCN5-related N-acetyltransferase (InterPro:IPR000182), Acyl-CoA N-acyltransfe…	Acyl-CoA N-acyltransferase | GNAT domain	NO
AT1G26230	-1.03347	4.43161	1.69444e-19	2.19755e-17	DOWN	TCP-1/cpn60 chaperonin family protein	TCP-1/cpn60 chaperonin family protein; FUNCTIONS IN: ATP binding; INVOLVED IN: protein refolding, cellular protein metabolic process; EXPRESSED IN: 22 plant structures; LOCATED IN: chloroplast; EXPRESSED DURING: 13 growth stages; CONTAINS InterPro DOMAIN/s: Chaperonin Cpn60/TCP-1 (InterPro:IPR002423), Chaperonin Cpn60 (InterPro:IPR001844); BEST Arabidopsis thaliana protein match is: chaperonin 60…	Chaperonin Cpn60 | Chaperonin Cpn60/TCP-1 | GroEL-like apical domain | GroEL-like equatorial domain	NO
AT1G26260	-0.913955	2.20139	4.01638e-07	7.25727e-06	DOWN	cryptochrome-interacting basic-helix-loop-helix 5	cryptochrome-interacting basic-helix-loop-helix 5 (CIB5); FUNCTIONS IN: DNA binding, sequence-specific DNA binding transcription factor activity; INVOLVED IN: positive regulation of flower development, regulation of transcription; LOCATED IN: nucleus; EXPRESSED IN: 20 plant structures; EXPRESSED DURING: 13 growth stages; CONTAINS InterPro DOMAIN/s: Helix-loop-helix DNA-binding domain (InterPro:IP…	Myc-type, basic helix-loop-helix (bHLH) domain	NO
AT1G26270	0.3385	5.62046	0.00165873	0.0107864	UP	Phosphatidylinositol 3- and 4-kinase family protein	Phosphatidylinositol 3- and 4-kinase family protein; FUNCTIONS IN: inositol or phosphatidylinositol kinase activity, phosphotransferase activity, alcohol group as acceptor; LOCATED IN: cellular_component unknown; EXPRESSED IN: 23 plant structures; EXPRESSED DURING: 13 growth stages; CONTAINS InterPro DOMAIN/s: Phosphatidylinositol 3-/4-kinase, catalytic (InterPro:IPR000403); BEST Arabidopsis thal…	Phosphatidylinositol 3-/4-kinase, catalytic domain | Ubiquitin-related domain	NO
AT1G26340	0.496341	3.15406	0.000383578	0.00312816	UP	cytochrome B5 isoform A	cytochrome B5 isoform A (CB5-A); CONTAINS InterPro DOMAIN/s: Cytochrome b5, heme-binding site (InterPro:IPR018506), Cytochrome b5 (InterPro:IPR001199); BEST Arabidopsis thaliana protein match is: cytochrome B5 isoform B (TAIR:AT2G32720.1)	Cytochrome b5, heme-binding site | Cytochrome b5-like heme/steroid binding domain	NO
AT1G26560	-0.540542	5.39403	2.89296e-05	0.000338561	DOWN	beta glucosidase 40	beta glucosidase 40 (BGLU40); FUNCTIONS IN: cation binding, hydrolase activity, hydrolyzing O-glycosyl compounds, catalytic activity; INVOLVED IN: carbohydrate metabolic process; LOCATED IN: apoplast, chloroplast; EXPRESSED IN: 23 plant structures; EXPRESSED DURING: 13 growth stages; CONTAINS InterPro DOMAIN/s: Glycoside hydrolase, family 1 (InterPro:IPR001360), Glycoside hydrolase, family 1, act…	Glycoside hydrolase, catalytic domain | Glycoside hydrolase, family 1 | Glycoside hydrolase, family 1, active site | Glycoside hydrolase, superfamily	NO
AT1G26650	-0.611986	4.3497	1.91033e-07	3.6881e-06	DOWN		unknown protein; BEST Arabidopsis thaliana protein match is: unknown protein (TAIR:AT1G69430.1)		NO
AT1G26660	1.03759	3.00186	2.53652e-11	9.85382e-10	UP	Prefoldin chaperone subunit family protein	Prefoldin chaperone subunit family protein; FUNCTIONS IN: unfolded protein binding; INVOLVED IN: protein folding; LOCATED IN: prefoldin complex; EXPRESSED IN: 21 plant structures; EXPRESSED DURING: 9 growth stages; CONTAINS InterPro DOMAIN/s: Prefoldin alpha-like (InterPro:IPR004127), Prefoldin (InterPro:IPR009053)	Prefoldin | Prefoldin alpha-like	NO
AT1G26730	1.16881	0.351575	0.000319244	0.00267142	UP	EXS (ERD1/XPR1/SYG1) family protein	EXS (ERD1/XPR1/SYG1) family protein; LOCATED IN: integral to membrane, plasma membrane; EXPRESSED IN: 22 plant structures; EXPRESSED DURING: 13 growth stages; CONTAINS InterPro DOMAIN/s: EXS, C-terminal (InterPro:IPR004342), SPX, N-terminal (InterPro:IPR004331); BEST Arabidopsis thaliana protein match is: EXS (ERD1/XPR1/SYG1) family protein (TAIR:AT1G35350.1)	EXS, C-terminal | SPX, N-terminal	NO
AT1G26740	0.410263	3.24435	0.00507094	0.0272529	UP	Ribosomal L32p protein family	Ribosomal L32p protein family; FUNCTIONS IN: structural constituent of ribosome; INVOLVED IN: translation; LOCATED IN: large ribosomal subunit; EXPRESSED IN: 21 plant structures; EXPRESSED DURING: 13 growth stages; CONTAINS InterPro DOMAIN/s: Ribosomal protein L32p (InterPro:IPR002677); BEST Arabidopsis thaliana protein match is: Ribosomal L32p protein family (TAIR:AT1G69485.1)	Ribosomal protein L32p | Zinc-binding ribosomal protein	NO
AT1G26761	-0.335627	5.22453	0.00367395	0.0209299	DOWN	Arabinanase/levansucrase/invertase	Arabinanase/levansucrase/invertase; FUNCTIONS IN: molecular_function unknown; INVOLVED IN: biological_process unknown; LOCATED IN: chloroplast	Glycosyl hydrolase, five-bladed beta-propellor domain	NO
AT1G26770	-0.74418	5.1576	0.00221096	0.0137065	DOWN	expansin A10	expansin A10 (EXPA10); CONTAINS InterPro DOMAIN/s: Pollen allergen, N-terminal (InterPro:IPR014734), Rare lipoprotein A (InterPro:IPR005132), Pollen allergen/expansin, C-terminal (InterPro:IPR007117), Barwin-related endoglucanase (InterPro:IPR009009), Expansin (InterPro:IPR002963), Expansin/Lol pI (InterPro:IPR007118), Expansin 45, endoglucanase-like (InterPro:IPR007112); BEST Arabidopsis thalian…	Barwin-like endoglucanase | Expansin | Expansin, cellulose-binding-like domain | Expansin/Lol pI | Expansin/pollen allergen, DPBB domain | RlpA-like double-psi beta-barrel domain	NO
AT1G26790	-2.25496	-2.46186	0.00330052	0.0191169	DOWN	Dof-type zinc finger DNA-binding family protein	Dof-type zinc finger DNA-binding family protein; FUNCTIONS IN: DNA binding, sequence-specific DNA binding transcription factor activity; INVOLVED IN: regulation of transcription; LOCATED IN: endomembrane system; EXPRESSED IN: stem; CONTAINS InterPro DOMAIN/s: Zinc finger, Dof-type (InterPro:IPR003851); BEST Arabidopsis thaliana protein match is: Dof-type zinc finger DNA-binding family protein (TA…		NO
AT1G26870	5.13436	-3.36302	0.00318474	0.0185934	UP	NAC (No Apical Meristem) domain transcriptional regulator superfamily protein	FEZ (FEZ); CONTAINS InterPro DOMAIN/s: No apical meristem (NAM) protein (InterPro:IPR003441); BEST Arabidopsis thaliana protein match is: NAC domain containing protein 94 (TAIR:AT5G39820.1)		NO
AT1G26920	0.866912	6.54416	1.15594e-12	5.53028e-11	UP		unknown protein; BEST Arabidopsis thaliana protein match is: unknown protein (TAIR:AT1G69760.1)		NO
AT1G26940	-0.560914	2.93705	0.00152231	0.0100299	DOWN	Cyclophilin-like peptidyl-prolyl cis-trans isomerase family protein	Cyclophilin-like peptidyl-prolyl cis-trans isomerase family protein; FUNCTIONS IN: peptidyl-prolyl cis-trans isomerase activity; INVOLVED IN: protein folding; LOCATED IN: endomembrane system; EXPRESSED IN: 23 plant structures; EXPRESSED DURING: 13 growth stages; CONTAINS InterPro DOMAIN/s: Cyclophilin-like (InterPro:IPR015891), Peptidyl-prolyl cis-trans isomerase, cyclophilin-type (InterPro:IPR00…	Cyclophilin-like domain | Cyclophilin-type peptidyl-prolyl cis-trans isomerase domain	NO
AT1G26945	-1.01919	4.17373	2.49029e-10	8.2231e-09	DOWN	basic helix-loop-helix (bHLH) DNA-binding superfamily protein	KIDARI (KDR); FUNCTIONS IN: transcription regulator activity; INVOLVED IN: response to light stimulus; LOCATED IN: nucleus, chloroplast; CONTAINS InterPro DOMAIN/s: Helix-loop-helix DNA-binding domain (InterPro:IPR001092), Helix-loop-helix DNA-binding (InterPro:IPR011598); BEST Arabidopsis thaliana protein match is: basic helix-loop-helix (bHLH) DNA-binding family protein (TAIR:AT3G28857.1)	Myc-type, basic helix-loop-helix (bHLH) domain	NO
AT1G27000	0.266016	6.08749	0.00402375	0.0225385	UP	Protein of unknown function (DUF1664)	Protein of unknown function (DUF1664); CONTAINS InterPro DOMAIN/s: Protein of unknown function DUF1664 (InterPro:IPR012458); BEST Arabidopsis thaliana protein match is: Protein of unknown function (DUF1664) (TAIR:AT2G02730.2)	Protein of unknown function DUF1664	NO
AT1G27090	0.36255	7.39657	8.92079e-05	0.000897435	UP	glycine-rich protein	glycine-rich protein; BEST Arabidopsis thaliana protein match is: unknown protein (TAIR:AT3G24690.1)		NO
AT1G27100	0.805403	6.57163	3.82568e-08	8.54461e-07	UP	Actin cross-linking protein	Actin cross-linking protein; FUNCTIONS IN: molecular_function unknown; INVOLVED IN: biological_process unknown; LOCATED IN: vacuole; EXPRESSED IN: 23 plant structures; EXPRESSED DURING: 13 growth stages; CONTAINS InterPro DOMAIN/s: Protein of unknown function DUF569 (InterPro:IPR007679), Actin cross-linking (InterPro:IPR008999); BEST Arabidopsis thaliana protein match is: Protein of unknown funct…	Actin cross-linking | Protein of unknown function DUF569	NO
AT1G27120	-0.386136	4.14235	0.0094838	0.0455875	DOWN	Galactosyltransferase family protein	Galactosyltransferase family protein; FUNCTIONS IN: transferase activity, transferring hexosyl groups, transferase activity, transferring glycosyl groups; INVOLVED IN: protein amino acid glycosylation; LOCATED IN: endomembrane system, membrane; EXPRESSED IN: 23 plant structures; EXPRESSED DURING: 13 growth stages; CONTAINS InterPro DOMAIN/s: Galectin, carbohydrate recognition domain (InterPro:IPR…	Concanavalin A-like lectin/glucanase, subgroup | Concanavalin A-like lectin/glucanases superfamily | Galectin, carbohydrate recognition domain | Glycosyl transferase, family 31	NO
AT1G27170	0.752254	2.80135	1.66263e-05	0.000206282	UP	transmembrane receptors;ATP binding	transmembrane receptors;ATP binding; FUNCTIONS IN: transmembrane receptor activity, ATP binding; INVOLVED IN: signal transduction, apoptosis, defense response, innate immune response; INVOLVED IN: signal transduction, defense response, apoptosis, innate immune response; CONTAINS InterPro DOMAIN/s: Leucine-rich repeat, typical subtype (InterPro:IPR003591), NB-ARC (InterPro:IPR002182), Leucine-rich…	Leucine-rich repeat | NB-ARC | P-loop containing nucleoside triphosphate hydrolase | Toll/interleukin-1 receptor homology (TIR) domain	NO
AT1G27190	0.521202	5.66668	2.70414e-08	6.24678e-07	UP	Leucine-rich repeat protein kinase family protein	Leucine-rich repeat protein kinase family protein; FUNCTIONS IN: protein serine/threonine kinase activity, kinase activity, ATP binding; INVOLVED IN: transmembrane receptor protein tyrosine kinase signaling pathway, protein amino acid phosphorylation; LOCATED IN: nucleus, plasma membrane; EXPRESSED IN: 24 plant structures; EXPRESSED DURING: 13 growth stages; CONTAINS InterPro DOMAIN/s: Protein ki…	Leucine-rich repeat | Leucine-rich repeat-containing N-terminal, type 2 | Protein kinase domain | Protein kinase-like domain | Serine-threonine/tyrosine-protein kinase catalytic domain	NO
AT1G27285	1.3346	1.17571	2.44385e-08	5.70028e-07	UP	transposable element gene	copia-like retrotransposon family, has a 0. P-value blast match to GB:AAC02666 polyprotein (Ty1_Copia-element) (Arabidopsis thaliana)		NO
AT1G27290	0.522066	6.81684	8.41063e-06	0.000113085	UP		unknown protein; FUNCTIONS IN: molecular_function unknown; INVOLVED IN: biological_process unknown; EXPRESSED IN: 25 plant structures; EXPRESSED DURING: 15 growth stages		NO
AT1G27300	0.674635	4.91038	1.65909e-09	4.8297e-08	UP		unknown protein		NO
AT1G27310	0.469274	5.83236	7.73769e-06	0.000105128	UP	nuclear transport factor 2A	nuclear transport factor 2A (NTF2A); CONTAINS InterPro DOMAIN/s: Nuclear transport factor 2 (InterPro:IPR002075), Nuclear transport factor 2, Eukaryote (InterPro:IPR018222); BEST Arabidopsis thaliana protein match is: nuclear transport factor 2B (TAIR:AT1G27970.1)	Nuclear transport factor 2 | Nuclear transport factor 2, eukaryote	NO
AT1G27360	-0.635641	2.99864	7.01906e-05	0.000728762	DOWN	squamosa promoter-like 11	squamosa promoter-like 11 (SPL11); FUNCTIONS IN: DNA binding, sequence-specific DNA binding transcription factor activity; INVOLVED IN: regulation of transcription, regulation of timing of transition from vegetative to reproductive phase; LOCATED IN: nucleus; EXPRESSED IN: 21 plant structures; EXPRESSED DURING: 10 growth stages; CONTAINS InterPro DOMAIN/s: Transcription factor, SBP-box (InterPro:…	Transcription factor, SBP-box	NO
AT1G27370	-0.940095	4.24682	2.44662e-14	1.48745e-12	DOWN	squamosa promoter binding protein-like 10	squamosa promoter binding protein-like 10 (SPL10); FUNCTIONS IN: DNA binding, transcription activator activity, sequence-specific DNA binding transcription factor activity; INVOLVED IN: leaf shaping, regulation of transcription, regulation of timing of transition from vegetative to reproductive phase; LOCATED IN: nucleus; EXPRESSED IN: 24 plant structures; EXPRESSED DURING: 13 growth stages; CONT…	Transcription factor, SBP-box	NO
AT1G27400	0.301189	6.4708	0.00253236	0.0153238	UP	Ribosomal protein L22p/L17e family protein	Ribosomal protein L22p/L17e family protein; FUNCTIONS IN: structural constituent of ribosome; INVOLVED IN: translation; LOCATED IN: ribosome, cytosolic large ribosomal subunit, plasma membrane, chloroplast, vacuole; EXPRESSED IN: 23 plant structures; EXPRESSED DURING: 13 growth stages; CONTAINS InterPro DOMAIN/s: Ribosomal protein L22/L17 (InterPro:IPR001063), Ribosomal protein L22/L17, eukaryoti…	Ribosomal protein L22/L17 | Ribosomal protein L22/L17, conserved site | Ribosomal protein L22/L17, eukaryotic/archaeal	NO
AT1G27410	0.485406	3.05391	0.00328341	0.0190341	UP	DNA repair metallo-beta-lactamase family protein	DNA repair metallo-beta-lactamase family protein; CONTAINS InterPro DOMAIN/s: DNA repair metallo-beta-lactamase (InterPro:IPR011084); BEST Arabidopsis thaliana protein match is: sterile alpha motif (SAM) domain-containing protein (TAIR:AT2G45700.1)	Beta-lactamase-like | DNA repair metallo-beta-lactamase	NO
AT1G27420	0.641769	2.45771	0.00113801	0.00785277	UP	Galactose oxidase/kelch repeat superfamily protein	Galactose oxidase/kelch repeat superfamily protein; FUNCTIONS IN: molecular_function unknown; INVOLVED IN: biological_process unknown; LOCATED IN: chloroplast; CONTAINS InterPro DOMAIN/s: Kelch repeat type 1 (InterPro:IPR006652), Galactose oxidase/kelch, beta-propeller (InterPro:IPR011043), Kelch related (InterPro:IPR013089), Kelch-type beta propeller (InterPro:IPR015915); BEST Arabidopsis thalia…	F-box domain | Galactose oxidase, beta-propeller | Kelch repeat type 1	NO
AT1G27435	0.416762	4.01596	0.000824625	0.00598711	UP		unknown protein		NO
AT1G27460	1.13619	4.46386	1.05153e-09	3.16221e-08	UP	no pollen germination related 1	no pollen germination related 1 (NPGR1); FUNCTIONS IN: calmodulin binding; INVOLVED IN: biological_process unknown; LOCATED IN: plasma membrane; EXPRESSED IN: 23 plant structures; EXPRESSED DURING: 13 growth stages; CONTAINS InterPro DOMAIN/s: Tetratricopeptide-like helical (InterPro:IPR011990), Tetratricopeptide repeat-containing (InterPro:IPR013026), Tetratricopeptide repeat (InterPro:IPR019734…	Tetratricopeptide TPR1 | Tetratricopeptide repeat | Tetratricopeptide repeat-containing domain | Tetratricopeptide-like helical domain	NO
AT1G27470	0.508351	3.94445	0.000206881	0.00183706	UP	transducin family protein / WD-40 repeat family protein	transducin family protein / WD-40 repeat family protein; CONTAINS InterPro DOMAIN/s: WD40 repeat-like-containing domain (InterPro:IPR011046), WD40 repeat 2 (InterPro:IPR019782), Cytochrome cd1-nitrite reductase-like, C-terminal haem d1 (InterPro:IPR011048), WD40-repeat-containing domain (InterPro:IPR017986), WD40 repeat (InterPro:IPR001680), WD40/YVTN repeat-like-containing domain (InterPro:IPR01…	WD40 repeat | WD40-repeat-containing domain | WD40/YVTN repeat-like-containing domain	NO
AT1G27480	-0.94707	5.41027	8.07968e-21	1.18835e-18	DOWN	alpha/beta-Hydrolases superfamily protein	alpha/beta-Hydrolases superfamily protein; FUNCTIONS IN: phosphatidylcholine-sterol O-acyltransferase activity; INVOLVED IN: lipid metabolic process; LOCATED IN: plasma membrane, vacuole; EXPRESSED IN: 21 plant structures; EXPRESSED DURING: 13 growth stages; CONTAINS InterPro DOMAIN/s: Lecithin:cholesterol acyltransferase (InterPro:IPR003386)	Alpha/Beta hydrolase fold | Lecithin:cholesterol/phospholipid:diacylglycerol acyltransferase	NO
AT1G27500	0.427932	2.88633	0.00467179	0.0255099	UP	Tetratricopeptide repeat (TPR)-like superfamily protein	Tetratricopeptide repeat (TPR)-like superfamily protein; FUNCTIONS IN: binding; LOCATED IN: cellular_component unknown; EXPRESSED IN: cultured cell; CONTAINS InterPro DOMAIN/s: Tetratricopeptide-like helical (InterPro:IPR011990), Tetratricopeptide repeat-containing (InterPro:IPR013026), Tetratricopeptide repeat (InterPro:IPR019734); BEST Arabidopsis thaliana protein match is: Tetratricopeptide re…	Tetratricopeptide repeat | Tetratricopeptide repeat-containing domain | Tetratricopeptide-like helical domain	NO
AT1G27520	-0.457706	5.33953	1.09062e-05	0.000142431	DOWN	Glycosyl hydrolase family 47 protein	Glycosyl hydrolase family 47 protein; FUNCTIONS IN: mannosyl-oligosaccharide 1,2-alpha-mannosidase activity, alpha-mannosidase activity, calcium ion binding; INVOLVED IN: protein amino acid N-linked glycosylation; LOCATED IN: endomembrane system, membrane; EXPRESSED IN: 22 plant structures; EXPRESSED DURING: 13 growth stages; CONTAINS InterPro DOMAIN/s: Glycoside hydrolase, family 47 (InterPro:IP…	Glycoside hydrolase, family 47	NO
AT1G27530	0.297186	5.55448	0.00233434	0.0143185	UP		CONTAINS InterPro DOMAIN/s: Ubiquitin-conjugating enzyme/RWD-like (InterPro:IPR016135), Ubiquitin-fold modifier-conjugating enzyme 1 (InterPro:IPR014806)	Ubiquitin-conjugating enzyme/RWD-like | Ubiquitin-fold modifier-conjugating enzyme 1	NO
AT1G27590	-1.43114	2.56198	2.12843e-12	9.7667e-11	DOWN		CONTAINS InterPro DOMAIN/s: Protein of unknown function DUF3453 (InterPro:IPR021850); BEST Arabidopsis thaliana protein match is: phosphatidylinositol 3- and 4-kinase family protein (TAIR:AT1G27570.1)		NO
AT1G27595	0.481182	5.28288	2.23003e-06	3.4203e-05	UP		CONTAINS InterPro DOMAIN/s: Symplekin tight junction protein C-terminal (InterPro:IPR022075); BEST Arabidopsis thaliana protein match is: HEAT repeat-containing protein (TAIR:AT5G01400.1)	Armadillo-type fold | Symplekin C-terminal | Symplekin/Pta1	NO
AT1G27600	0.397493	4.86693	0.000100691	0.000995414	UP	Nucleotide-diphospho-sugar transferases superfamily protein	IRREGULAR XYLEM 9-LIKE (IRX9-L); CONTAINS InterPro DOMAIN/s: Glycosyl transferase, family 43 (InterPro:IPR005027); BEST Arabidopsis thaliana protein match is: Nucleotide-diphospho-sugar transferases superfamily protein (TAIR:AT2G37090.1)	Glycosyl transferase, family 43 | Nucleotide-diphospho-sugar transferases	NO
AT1G27650	0.402664	6.20348	0.000122837	0.0011814	UP	U2 snRNP auxiliary factor small subunit, putative	ATU2AF35A; FUNCTIONS IN: RNA binding, nucleotide binding, zinc ion binding, nucleic acid binding; FUNCTIONS IN: RNA binding, zinc ion binding, nucleotide binding, nucleic acid binding; INVOLVED IN: photoperiodism, flowering; LOCATED IN: nucleus; EXPRESSED IN: 26 plant structures; EXPRESSED DURING: 14 growth stages; CONTAINS InterPro DOMAIN/s: Zinc finger, CCCH-type (InterPro:IPR000571), RNA recog…	Nucleotide-binding, alpha-beta plait | RNA recognition motif domain | U2 auxiliary factor small subunit | Zinc finger, CCCH-type	NO
AT1G27670	1.21913	2.4996	0.000244865	0.00212943	UP		unknown protein; BEST Arabidopsis thaliana protein match is: unknown protein (TAIR:AT1G75360.1)		NO
AT1G27750	0.422273	4.80847	4.60502e-05	0.00050803	UP	nucleic acid binding	nucleic acid binding; FUNCTIONS IN: nucleic acid binding; INVOLVED IN: biological_process unknown; LOCATED IN: cellular_component unknown; EXPRESSED IN: cultured cell; CONTAINS InterPro DOMAIN/s: Spen paralogue and orthologue SPOC, C-terminal (InterPro:IPR012921), RNA recognition motif, RNP-1 (InterPro:IPR000504)	RNA recognition motif domain | Spen paralogue and orthologue SPOC, C-terminal	NO
AT1G27752	0.382599	5.54839	8.51633e-05	0.000862153	UP	Ubiquitin system component Cue protein	Ubiquitin system component Cue protein; FUNCTIONS IN: molecular_function unknown; INVOLVED IN: biological_process unknown; CONTAINS InterPro DOMAIN/s: Ubiquitin system component Cue (InterPro:IPR003892); LOCATED IN: chloroplast	UBA-like | Ubiquitin system component Cue	NO
AT1G27760	-0.565606	5.85967	1.10723e-07	2.25196e-06	DOWN	interferon-related developmental regulator family protein / IFRD protein family	SALT-TOLERANCE 32 (SAT32); FUNCTIONS IN: binding; INVOLVED IN: response to salt stress; LOCATED IN: nucleus, cytoplasm; EXPRESSED IN: 23 plant structures; EXPRESSED DURING: 14 growth stages; CONTAINS InterPro DOMAIN/s: Interferon-related developmental regulator, N-terminal (InterPro:IPR007701), Interferon-related developmental regulator, C-terminal (InterPro:IPR006921), Armadillo-type fold (Inter…	Armadillo-like helical | Armadillo-type fold | Interferon-related developmental regulator, C-terminal | Interferon-related developmental regulator, N-terminal	NO
AT1G27770	1.19078	5.33741	3.35061e-09	9.19738e-08	UP	autoinhibited Ca2+-ATPase 1	autoinhibited Ca2+-ATPase 1 (ACA1); FUNCTIONS IN: calcium channel activity, calcium-transporting ATPase activity, calmodulin binding; INVOLVED IN: cation transport, calcium ion transport, ATP biosynthetic process; INVOLVED IN: cation transport, calcium ion transport, metabolic process, ATP biosynthetic process; LOCATED IN: endoplasmic reticulum, plasma membrane, chloroplast inner membrane; EXPRES…	Calcium-transporting P-type ATPase, N-terminal autoinhibitory domain | Calcium-transporting P-type ATPase, subfamily IIB | Cation-transporting P-type ATPase | Cation-transporting P-type ATPase, C-terminal | Cation-transporting P-type ATPase, N-terminal | HAD-like domain | P-type ATPase, transmembrane domain | P-type ATPase, A domain | P-type ATPase, cytoplasmic domain N | P-type ATPase, phosphory…	NO
AT1G27840	0.949793	4.59868	1.08975e-18	1.28336e-16	UP	Transducin/WD40 repeat-like superfamily protein	ATCSA-1; CONTAINS InterPro DOMAIN/s: WD40 repeat 2 (InterPro:IPR019782), WD40 repeat, conserved site (InterPro:IPR019775), WD40 repeat (InterPro:IPR001680), G-protein beta WD-40 repeat, region (InterPro:IPR020472), WD40 repeat-like-containing domain (InterPro:IPR011046), WD40-repeat-containing domain (InterPro:IPR017986), WD40/YVTN repeat-like-containing domain (InterPro:IPR015943), WD40 repeat, …	G-protein beta WD-40 repeat | WD40 repeat | WD40 repeat, conserved site | WD40-repeat-containing domain | WD40/YVTN repeat-like-containing domain	NO
[truncated: 6,336 more rows]

## Sheet: ab_Koncz_Share
Gene ID	Category	Protein annotation
AT1G01350	NTC-associated	zinc finger CCCH domain-containing protein 1
AT1G02330	Abundant first in C complex	hypothetical protein
AT1G03140	Second step factors	atPrp18-1 atPrp18-1 splicing factor Prp18-like protein
AT1G03910	Abundant first in C complex	hypothetical protein
AT1G07170	17S U2 snRNP	atSF3b_14b-a PHF5-like protein
[truncated: 99 more rows]

## Sheet: GO_ab_up_C
Term Name	GOID	Term Type	Depth	cnt(reference)	cnt(ab_up)	fsh(ab_up)
[truncated: 99 more rows]

[truncated: 29 more sheets: GO_ab_up_F, GO_ab_up_P, GO_ab_down_C, GO_ab_down_F, GO_ab_down_P, share_a_ab, a_ab_Koncz_Share, GO_a_ab_up_C, GO_a_ab_up_F, GO_a_ab_up_P, GO_a_ab_down_C, GO_a_ab_down_F, GO_a_ab_down_P, share_b_ab, b_ab_Koncz_Share, GO_b_ab_up_C, GO_b_ab_up_F, GO_b_ab_up_P, GO_b_ab_down_C, GO_b_ab_down_F …]
